# Supplementary material for: Complete sequences of Schizosaccharomyces pombe subtelomeres reveal multiple patterns of genome variation
Source: PubMed Central journal article supplement (PMC7840980; doi:10.1038/s41467-020-20595-1), 2021-01-27
Supplement: 41467_2020_20595_MOESM1_ESM.pdf [file 41467_2020_20595_MOESM1_ESM.pdf]

**Supplementary information**  
**for**  
**Complete sequences of *Schizosaccharomyces pombe* subtelomeres**  
**reveal multiple patterns of genome variation**

Yusuke Oizumi<sup>1,2</sup>, Takuto Kaji<sup>2</sup>, Sanki Tashiro<sup>2,3</sup>, Yumiko Takeshita<sup>2</sup>,

Yuko Date<sup>1</sup>, and Junko Kanoh<sup>1,2,4\*</sup>

<sup>1</sup> Department of Life Sciences, Graduate School of Arts and Sciences, the University of Tokyo, 3-8-1 Komaba, Meguro-ku, Tokyo 153-8902, Japan

<sup>2</sup> Former address: Institute for Protein Research, Osaka University, 3-2 Yamadaoka, Suita, Osaka 565-0871, Japan

<sup>3</sup> Present address: Institute of Molecular Biology, University of Oregon, 1370 Franklin Blvd, Eugene, OR, USA

<sup>4</sup> Department of Biological Sciences, Graduate School of Science, the University of Tokyo, 7-3-1 Hongo, Bunkyo-ku, Tokyo 113-0033, Japan

\* Correspondence: [jkanoh@bio.c.u-tokyo.ac.jp](mailto:jkanoh@bio.c.u-tokyo.ac.jp)

Contents: Supplementary Figures 1-11

Supplementary Tables 1-4

Supplementary References

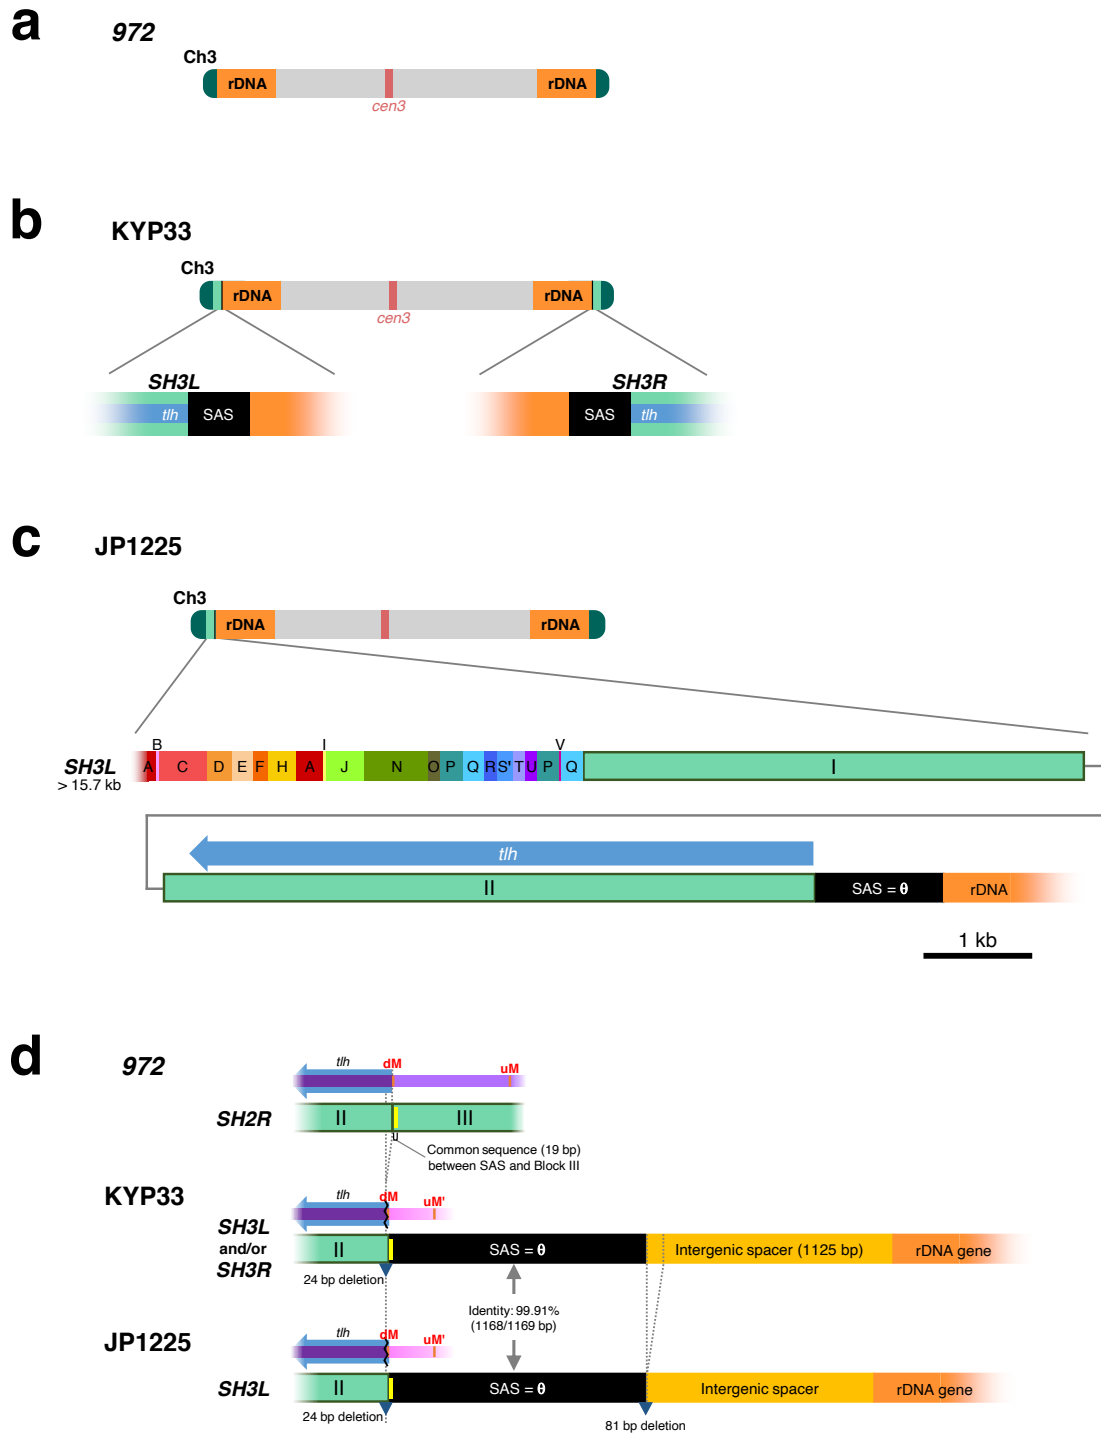

Supplementary Fig. 1 Structures of chromosome ends of Ch3 in descendent strains of 972.

- (a) Strain 972 has no subtelomere sequence in Ch3.
- (b) Strain KYP33 (*h<sup>-</sup> leu1-32 ura4-D18*) has subtelomeres including *SH* and SAS (subtelomere-associated sequence) sequences at both ends of Ch3<sup>1</sup>.
- (c) Strain JP1225 (*h<sup>-</sup> ade6-M216 leu1-32 ura4-D18 his7-366*) has a subtelomere including *SH-P* (homologous with pNSU71, see Fig. 3a), blocks I and II, and SAS at the left arm of Ch3<sup>2</sup>.
- (d) Detailed information for the Ch3 ends in the three strains. The sequence of SAS which has not been found in PomBase-972, is the same as that of box  $\theta$  (see Fig. 6). Yellow box, common sequence (19 bp) between SAS and block III; blue arrow with a purple line, homologous region with the *tlh2* ORF defined in PomBase; pale purple line, predicted extension of the coding region of the *tlh2* gene as described in Fig. 8b; pink line, predicted in-frame extension of the coding region in the same reading frame; blue arrowhead, nucleotide deletion; dM (downstream M), the original first methionine codon of the *tlh2* ORF in PomBase-972 or its corresponding first methionine codon in KYP33 and JP1225; uM (upstream M) and uM', putative first methionine codons upstream of dM (also see the main text and Fig. 8b). Note that the 24 bp-deletions just downstream of dM codon in KYP33 and JP1225 do not cause frame shifts or premature nonsense mutation.

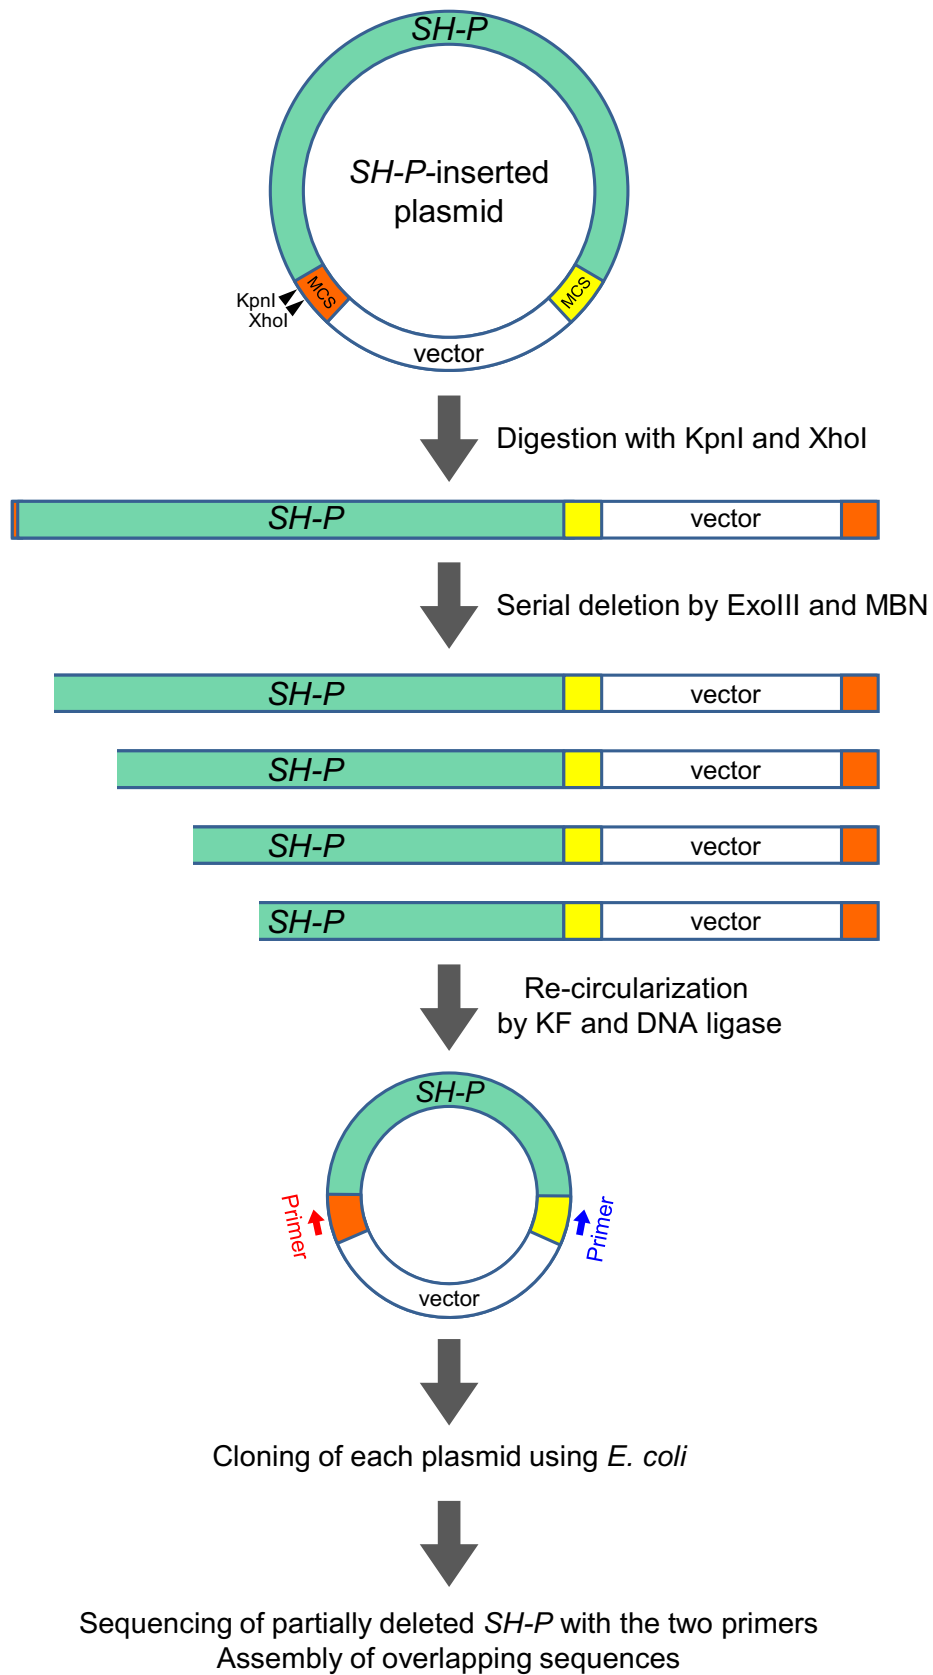

**Supplementary Fig. 2 Sequencing of *SH-P* regions by the serial deletion method.**

The *SH-P* region with various common segments (~5 kb) was amplified by PCR from a 972SD4 strain, and inserted into a vector. The resultant plasmid was digested with restriction enzymes, KpnI and XhoI, at the multi-cloning sites (MCSs) of the vector. The linearized plasmid was serially deleted from the 5'-overhang at XhoI site by treating with exonuclease III (ExoIII) and mung bean nuclease (MBN) for fixed times. After deletion of the *SH-P* DNA, both ends of the plasmid were blunted by klenow fragment (KF) and ligated by DNA ligase, and then re-circularized plasmids were cloned using *Escherichia coli* (*E. coli*). The partially deleted *SH-P* DNAs were sequenced using primers that anneal to MCSs of the vector. The sequence reads were assembled using overlapping sequences.

**a**

```

A1 1 GCAGCCTCGCCTTACGGCTCGGCTGACGGGTGGGGCCCAATAGTGGGGCATTGTATTGTGAAAAAAA 70
A2 1 GAATACCTCGCCGTACGGCTCGGCTGACGGGTGGGGCCCAATAGTGGGGCATTGTATTGTGAAAAAAA 70

71 CTTAAGTAAATTTATTTTTTATGAATACCGTATTTCAATTTCTATTTCTTTATTCAACTACCGCACTTC 140
71 CTTAAGTAAATTTATTTTTTATGAATACCGTATTTCAATTTCTATTTCTTTATTCAACTACCGCACTTC 140

141 CTAATTCCTTTATTTCTATATTGTTACTCCGTTACCCAATTAATTATGACTGAGTGAACTTCAAATTTT 210
141 CTAATTCCTTTATTTCTATATTGTTACTCCGTTACCCAATTAATTATGACTGAGTGAACTTCAAATTTT 210

211 TCATCCATTTTAATTATCATAATACACTGC 240 (bp)
211 TCATCCATTTTAATTATCATAATACACTGC 240 (bp)

```

A1 vs. A2  
98.33%  
(236/240 bp)

**b**

```

B 1 ACTACTGTATTACACTTAGTGAATTTCCACAT 32 (bp)

```

**c**

```

C1 1 ACTCAATTCCACACATTTCAATTTTTTCCCATCCTAAATACTATAGTACACTACCTCACCGTATTATACT 70
C2 1 ACTCAATTCCACACATTTCAATTTTTTCCCATCCTAAATACTATAGTACACTACCTCACCGTATTATACT 70
C3 1 ACTCAATTCCACACATTTCAATTTTTTCCCATCCTAAATACTATAGTACACTACCTCACCGTATTATACT 70
C' -----
71 TAATGAACTCTAACACACTCAATTCATAACAATTCAAATTTTTTCCCATCCTAAATACTATAGTACACTA 140
71 TAATGAACTCTAACACACTCAATTCATAACAATTCAAATTTTTTCCCATCCTAAATACTATAGTACACTA 140
71 TAATGAACTCTAACACACTCAATTCATAACAATTCAAATTTTTTCCCATCCTAAATACTATAGTACACTA 140
-----
141 CCTCACCGTATTATACTTAATGAACTCTAACACACTCAATTC-CACACATTTTCAATTTTTTACCCATCC 208
141 CCTCACCGTATTATACTTAATGAACTCTAACACACTCAATTCATACAACCTT-CAAATTTTTTACCTATCC 209
141 CCTCACCGTATTATACTTAATGAACTCTAACACACTCAATTCATACAACCTT-CAAATTTTTTACCTATCC 209
1 -----ACTCAATTC-CACACATTTTCAATTTTTTACCCATCC 35
-----
209 TAAATACTATAGTACACTACATCACCGTATTATACTTAATGAACTATAACACACTCAATTCATACAACCT 278
210 TAAATACTATAGTACACTACATCACCGTATTATACTTAATGAACTCTAACACACTCAATTCATACAACCT 279
210 TAAATACTATAGTACACTACATCACCGTATTATACTTAATGAACTCTAACACACTCAATTCATACAACCT 279
36 TAAATACTATAGTACACTACATCACCGTATTATACTTAATGAACTATAACACACTCAATTCATACAACCT 105
-----
279 CAAATTTTTTACCCATCCTAATTTATATAGTACACTACATCACTGTATTATACTTAACGTATTCCAGCAC 348
280 CAAATTTTTTAAACATCCTAATTTATATAGTACACTACCTCACCGTATTATACTTAACGTATTCCAGCAC 349
280 CAAATTTTTTAAACATCCTAATTTATATAGTACACTACCTCACCGTATTATACTTAACGTATTCCAGCAC 349
106 CAAATTTTTTACCCATCCTAATTTATATAGTACACTACATCACTGTATTATACTTAACGTATTCCAGCAC 175
-----
349 ACTCAATTCATACAACCTCAATTTTTTATCTATCCTAAATACTATAGTACATTACATCACCGTATTATA 418
350 ACTCAATTCATACAACCTCAATTTTTTATCTATCCTAAATACTATAGTACATTACATCACCGTATTATA 418
350 ACTCAATTCATACAACCTCAATTTTTTATCTATCCTAAATACTATAGTACATTACATCACCGTATTATA 419
176 ACTCAATTCATACAACCTCAATTTTTTATCTATCCTAAATACTATAGTACATTACATCACCGTATTATA 245
-----
419 CTTAATGAACTTTAACAC 436 (bp)
419 CTTAATGAACTTTAACAC 436 (bp)
420 CTTAATGAACTTTAACAC 437 (bp)
246 CTTAATGAACTTTAACAC 263 (bp)

```

| C1 vs. C2    | C1 vs. C3    | C2 vs. C3    |
|--------------|--------------|--------------|
| 95.21%       | 97.26%       | 97.94%       |
| (417/438 bp) | (426/438 bp) | (428/437 bp) |



**f**

```

F1  1 CTCTCTCTAAAAACGTTTAAACGAATACTCGCCTTACGGCTCGGCTGACGGGTGGGGG-CCAATAGTGGGG 69
F2  1 CTCTCTCTAAAAACGTTTAAACGAATACTCGCCTTACGGCTCGGCTGACGGGTGGGGG-CCAATAGTGGGG 69
F3  1 CTCTCTCTAAAAACGTTTAAACGAATACTCGCCTTACGGCTCGGCTGACGGGTGGGGGTCCAAGTAGTGGGG 70

70 GCATTTTATATATGTGAAAAAACTTAAGTAAATTTAAATTTTTATAAATAACGCACTTAATTATCTTT 139
70 GCA--TTGTATATGTGAAAAAACTTAAGTAAATTTAAATTTTTATAAATAACGCACTTAATTATCTTT 137
71 GCA--TTGTATATGTGAAAAAACTTAAGTAAATTTAAATTTTTATAAATAACGCACTTAATTATCTTT 138

140 CTTTATCT 147 (bp)
138 CTTTATCT 145 (bp)
139 CTTTATCT 146 (bp)

```

| F1 vs. F2    | F1 vs. F3    | F2 vs. F3    |
|--------------|--------------|--------------|
| 96.60%       | 95.95%       | 97.95%       |
| (142/147 bp) | (142/148 bp) | (143/146 bp) |

**g**

```

G  1 ATATTACCGTACGTTCTAATTGCTCCTTATTCTACATTGTTACTTTGTAACCCAATTAATTATGACTGAG 70
71 TGAACTTCAAATTTTTCATCCATTACCATTACCATATTACGCTGCCTACAGTATTACACTTAGTGAATT 140
141 TCAACAT 147 (bp)

```

**h**

```

H1  1 TCATTATCATACTACGCTGCACAACGTAATCTACTTAACTACTCCAATATAGTCCCTCTGCTTTTATCT 70
H2  1 TCATTATCATACTACGCTGCACAACATAATCTACTTAACTACTCCAATATAGTCCCTCTGCTTTTATCT 70

71 TCTTTCCTCTTACTTTACTTATTTCTTTTACTCTTACTTTATTTATTTACTCTCCTTACTCTGTTTCT 140
71 TCTTTCCTCTTACTTTACTTATTTCTTTTACTCTTACTTTATTTATTTACTCTCCTTACTCTGTTTCT 140

141 TCTATTCTATTCACTTACTTCTTCTCATTCTTCTCTCTCTCTCTCTATATCTTCTACTCTTTTATCATA 210
141 TCTATTCTATTCACTTACTTCTTCTCATTCTTCTCTCTCTCTCTCTATATCTTCTACTCTTTTATCATA 210

211 CTCTCTTACCTCCATCCATTATCCATTCTCTCTCCTCAAAATCGTTTAAAC 260 (bp)
211 CTCTCTTACCTCCATCCATTATCCATTCTCTCTCCTCAAAATCGTTTAAAC 260 (bp)

```

| H1 vs. H2    |
|--------------|
| 99.23%       |
| (258/260 bp) |

**i**

```

I  1 GCCCCTTTATTCTACTTACTGCACCCTAACGC 32 (bp)

```

**j**

```

J  1 ACTCAAGCCCACACATTTCAACTTTTTATTACCATATCTCATTATATCTCCTAATCATACATAATGAAT 70
71 CCTACCAGCTCAATTC AACCCAACCTTCATTTTCTTCATTCATTTTCATTACCATAGTACGCTCCACAAC 140
141 TGTAATCTACTTAAATGTACTCCAACATACTCAACTTCCACACATTTCAAATTTTTTTTACCATTTTAT 210
211 TTACCCCTATTATACTTACCGTACTCCAACACACTCAATACATACCAACTCAAATTTTTTTATGCATCTG 280
281 ACTTTCCAATATACACTATGTATCCATCCTTATTTACTTTACTTTCTAACTCTCTTACTT 342 (bp)

```

**k**

```

K  1 TAATTACTTCTTTATTTCATCTTATTCTATTTATTTATTTATTTTCCCTTACTCCCTACTCCCTACTCCCTAC 70
K' 1 TAATTACTTCTTTATTTCATCTTATTCTATTTATTTATTTATTTTCCCTTACTCCCTACTCCCTACTCCCTAC 63

71 TCCCTACTCTCTACTCTATTCGTATTCTATATTTCTATATTCTATATTTCTATATTCTATATTCTATATTC 140
64 TCCCTACTCTCTACTCTATTCTG-----TATTCTATATTTCTATATTCTATATTCTATATTTCTATATTC 119

141 TATATTTCTATATTCTATATTTTCTTTTACTCCTTTATCTTTTCGTTAACATGTTTAAACGAATACTCGCTT 210
120 TATATTTCTATATTCTATATTTTCTTTTACTCCTTTATCTTTTCGTTAACATGTTTAAACGAATACTCGCTT 189

211 TACAGCTCGTTACCCACCTCACACATCACTGACTCAACTTCAAATTTCTCAACCGTACTCATTACCATAG 280
190 TACAGCTCGTTACCCACCTCACACATCACTGACTCAACTTCAAATTTCTCAACCGTACTCATTACCATAG 259

281 TACGCTGCGCAACTGTAATCTACTTAAATGAACCCTAA 317 (bp)
260 TACGCTGCGCAACTGTAATCTACTTAAATGAACCCTAA 296 (bp)

```



**l** L1 1 CACACTCAATTCAAATCAACTTCAAATTTTTCATTCGTTTTATTACCCATG 52 (bp)  
 L2 1 CACACTCAATTCAAATCAACTTCAAATTTTTCATCCGTTTTATTACATG 52 (bp)

L1 vs. L2  
 96.15%  
 (50/52 bp)

**m** M 1 TACACTATACTACCTTATTACCTTAGTGAACCATAACACTCACTTCAACCCAACCTCAAATTTTCA 70  
 71 TCCGTTTATTCCACTCATGTACACTACACCACCTTATTCCTACACATTTTATTCACTTTCTCTTA 140  
 141 TTCTCCTACTCTTCTTATTCATATTTTCTCCTCTTCTTCTTCCATACTCTACTCTATCTGTTCTAC 210  
 211 CTATTCCTCCTTCTTCTCTCTTATTCTGCCCCTCATTTTCTCCTTCATTTCTCTTACTTTCTCT 280  
 281 AACTACG 287 (bp)

**n** N 1 TGATTACTTCTTCATTCTCCTACTTTATTTATTTTATTTCATTTTATTTTATTTTATTTTATTTATTCGTT 70  
 71 TTTAAATATTTAAATTTACTCTCCTTACTTTATTTTGGATTCTACTCTCTCTATATATCCTACTCTTT 140  
 141 ATATTCCTCCTTCATTTCCCTTATCCATATGTTACTTCGTTATCCAGCTCACCATGACTGAGTCAACT 210  
 211 TCAAATTTTTCATCCCTTCAATTACCAAAGTCCACTACAATTCCTATTTATATTCCTGCATCCCAACA 280  
 281 CATTATTTCAACCACTTGTCTATCAATAATTACTATAGTTCAATACCTCATCCCTATTCCTACTTAATGCAC 350  
 351 CCAATATAGTCCCCTGCTTTTATCTTCTTCTTACTTTAATTGCTTCTTATTCCTACCTTATTT 420  
 421 ATTTTATTTTATTTTATTTTATTTTATTTTATTTTATTTTATTTTATTTTACTCTCCTTACTCTATTTCTTCT 490  
 491 ATATATCTACTTATATATCCTGCTCCTTCATCCTACTCTCTCTCTATATTTTACTCTTAAATTTCTA 560  
 561 TCTGTTACATTTCTTGTCTTTTCGTTAACAACA 591 (bp)

**o** O1 1 TTTAACGATTACTCGCCTTACGGCTCGTTACTTGCTTCACACCTGACTAAGTGAACCTTTGAATTTTTTTT 70  
 O2 1 TTTAACGATTACTCGCCTTACGTTCTCGTTCTCCTTCACACCTGACTAAGTGAACCTTTGAATTTTTTTT 70  
 71 CTTTTATTTAAATGACCATCCTCAAATTTCCCATCCTC 109 (bp)  
 71 CTTTTATTTAAATGACCATCCTCAAATTTCCCATCCTC 109 (bp)

O1 vs. O2  
 97.25%  
 (106/109 bp)

**p** P1 1 CCCGACGACATATCACTCAACAAACGTTTTCAATAATTTTTTTTCTTTTATCAATCATTTTATAAATTTA 70  
 P2 1 CCCGACGACATATCACTCAACAAACCTTTTTCAATAATTTTTTTTCTTTTATTAATCATTTTATAAATTTA 70  
 P3 1 CCCGACGACATATCACTCAACAAACCTTTTTCAATAATTTTTTTTCTTTTATTAATCATTTTATAAATTTA 70  
 P4 1 CCCGACGACATATCACTCAACAAACGTTTTCAATAATTTTTTTTCTTTTATCAATCATTTTATGATTTA 70  
 71 TTTTCAATTTTCAACTGCCTGCTGTTTGTCTTCATTGGCAAATAAATATTTTTCATTATTTTCTATCAT 140  
 71 TTTTCAATTTTCAACTGCCTGCTGTTTGTCTTCATTGGCAAATAAATATTTTTCATTATTTTCTATCAT 140  
 71 TTTTCAATTTTCAACTGCCTGCTGTTTGTCTTCATTGGCAAATAAATATTTTTCATTATTTTCTATCAT 140  
 71 TTTTCAATTTTCAACTGCCTGCTGTTTGTCTTCATTGGCAAATAAATATTTTTCATTATTTTCTATCAT 140  
 141 TATTTAATATTGCTTTTATTTGTGTTCCAATATTTGTATTTATATTTTATTTTATTTTCAATTTTATTTT 206 (bp)  
 141 TATTTAATATTGCTTTTATTTGTGTTCCAATATTTGTATTTATATTTTATTTTCAATTTTATTTT 206 (bp)  
 141 TATTTAATATTGCTTTTATTTGTGTTCCAATATTTGTATTTATATTTTATTTTCAATTTTATTTT 206 (bp)  
 141 TATTTAATATTGCTTTTATTTGTGTTCCAATATTTGTATTTATATTTTATTTTCAATTTTATTTT 206 (bp)

|    | P2                |              | P3                |              | P4                |              |
|----|-------------------|--------------|-------------------|--------------|-------------------|--------------|
|    | Match /Total (bp) | Identity (%) | Match /Total (bp) | Identity (%) | Match /Total (bp) | Identity (%) |
| P1 | 203/206           | 98.54        | 204/206           | 99.03        | 204/206           | 99.03        |
| P2 |                   |              | 205/206           | 99.51        | 201/206           | 97.57        |
| P3 |                   |              |                   |              | 202/206           | 98.06        |

q

Q1 1 TTAATTTTATTTATTTCTGTATATTTATTCGTTTTTAAATATTTTATTTTATTTTATTTTATTTTCATTTTCATTTTC 70  
 Q2 1 TTAATTTTATTTATTTCTATATATTTATTCGTTTTTAAATATTTTATTTTATTTTATTTTATTTTCATTTTCATTTTC 70  
 Q3 1 TTAATTTTATTTATTTCTATATATTTATTCGTTTTTAAATATTTTATTTTATTTTATTTTATTTTATTTTCATTTTC 65  
 Q4 1 TTAATTTTATTTATTTCTGTATATTTATTCGTTTTTAAATATTTTATTTTATTTTATTTTATTTTATTTTCATTTTC 70  
 Q5 1 TTAATTTTATTTATTTCTATATATTTATTCGTTTTTAAATATTTTATTTTATTTTATTTTATTTTCATTTTCATTTTC 70

71 ATTTTATTTTATTTTATTTTATTTTACACAATCATATTTATTTGTTTAAACATGACTAACATAAGCTCAATTTTC 140  
 71 ATTTTATTTTATTTTATTTTATTTTACACAATCATATTTATTTGTTTAAACATGACTAACATAAGCTCAATTTTC 140  
 66 ATTTTATTTTATTTTATTTTATTTTACGCAATCATATTTATTTATTTAACAATCTAACATAAGCTCAATTTTC 135  
 71 ATTTTATTTTATTTTATTTTATTTTACACAATCATATTTATTTGTTTAAACATGACTAACATAAGCTCAATTTTC 140  
 71 ATTTTATTTTATTTTATTTTATTTTACGCAATCATATTTATTTAACAATCTAACATAAGCTCAATTTTC 140

141 AAACACTTCATTTATCAAAGTACACCGCATGTTCCCTATTATACTTACTGCACTCCAACATA 201 (bp)  
 141 AAACACTTCATTTATCAAAGTACACCGCATGTTCCCTATTATACTTACTGCACTCCAACATA 201 (bp)  
 136 AAACACTTCATTTATCAAAGTACACCGCATGTTCCCTATTATACTTACTGCACTCCAACATA 196 (bp)  
 141 AAACACTTCATTTATCAAAGTACACCGCATGTTCCCTATTATACTTACTGCACTCCAACATA 201 (bp)  
 141 AAACACTTCATTTATCAAAGTACACCGCATGTTCCCTATTATACTTACTGCACTCCAACATA 201 (bp)

|    | Q2                |              | Q3                |              | Q4                |              | Q5                |              |
|----|-------------------|--------------|-------------------|--------------|-------------------|--------------|-------------------|--------------|
|    | Match /Total (bp) | Identity (%) | Match /Total (bp) | Identity (%) | Match /Total (bp) | Identity (%) | Match /Total (bp) | Identity (%) |
| Q1 | 200/201           | 99.50        | 191/201           | 95.02        | 200/201           | 99.50        | 196/201           | 97.51        |
| Q2 |                   |              | 192/201           | 95.52        | 199/201           | 99.00        | 197/201           | 98.01        |
| Q3 |                   |              |                   |              | 191/201           | 95.02        | 196/201           | 97.51        |
| Q4 |                   |              |                   |              |                   |              | 195/201           | 97.01        |

r

R1 1 GTCCCCTTCATTGTATCTTCTTTTTCTTACTTTACTTACTTCTTTGTTCTCCATTTTATTTATTTATTT 70  
 R2 1 GTCCCCTTCATTGTATCTTCTTTTTCTTACTTTACTTACTTCTTTGTTCTCCATTTTATTTATTTATTT 70

71 TCTTATTTCCATTACTTTTCTTCTTCTTCTTCTTCCATATTTCTAC 114 (bp)  
 71 TCTTATTTCCATTACTTTTCTTCTTCTTCTTCTTCCATATCTTCTAC 114 (bp)

R1 vs. R2  
 99.12%  
 (113/114 bp)

s

S 1 TCTACCTATTTCTGCTTTACTTTATTTCTACCTATTTCTACCTATTTCTGCTTTACTTTATTTCTACCTATCCAATA 70  
 S' 1 TCTACCTATTTCTGCTTTACTTTATTTCTACCTAT-----CCAATA 38

71 TTTTACTTCTCTATGTTTTACTCTTTTATATTTTCGTTAACAATGTTTAAACGATTACTCGCTTTACTGCTC 140  
 39 TTTTACTTCTCTATGTTTTACTCTTTTATATTTTCGTTAACAATGTTTAAACGATTACTCGCTTTACTGCTC 108

141 GTTACCCACCTGAATCAAACCTGAGTCAACTTCATATTTTT 181 (bp)  
 109 GTTACCCACCTGAATCAAACCTGAGTCAACTTCATATTTTT 149 (bp)

t

T 1 CATCCATCTGATTATCATAATACACTGCGTATCTTTATTTCAACTTACTGCATTACAACACAGCCTTATT 70  
 71 CTATAAAGTTCAAGTTTTCAATTCATCTATCTCCTCATTGCCCATAT 114 (bp)

u

U1 1 TGCACATACATCCCCTTATTATACTTACTGCATCCCAACACACTCACTTCCACTCATTTCAGTGTGTTGTC 70  
 U2 1 CACACTACATCCCCTTATTATACTTACTGCATCCCAACACACTCACTTCCACTCATTTCAGTGTGTTGTC 70  
 U3 1 TGCACATACATCCCCTTATTATACTTACTGCATCCCAACACACTCACTTCCACTCATTTCAGTGTGTTTAC 70

71 CATCTTCACTACCACACTACACTACTCATTTCTT 103 (bp)  
 71 CATCTTCACTACCACACTACACTACTCATTTCTT 103 (bp)  
 71 CATCTTCACTACCACACTACACTACTCATTTCTT 103 (bp)

U1 vs. U2    U1 vs. U3    U2 vs. U3  
 98.06%    99.03%    97.09%  
 (101/103 bp)    (102/103 bp)    (100/103 bp)

**V** V 1 TTAATTTTATTCA 14 (bp)

**W** W 1 TCTACTTATTCTACCTATACCTATTCTAC 29 (bp)

**X** X 1 TAACCATCCTAATTATTATAGTACACTACTTGTCCCTATCACCTTTAACGTACTCCAG 58 (bp)

**Supplementary Fig. 3 Sequences of common segments in *SH-P* regions.**

(a–x) Sequence alignments of variants and subtypes of segments A–X in Fig. 3. Nucleotide changes among variants are shown in red. Percentages of sequence identities among variants are indicated. Positions of common sequence motifs in segments C, E, K, and S are indicated by boxes according to Fig. 3b. Panel c\* shows the sequence alignment of the common sequence motifs of segment C, c1–8. Nucleotide changes are indicated in red. The table below shows percentages of sequence identities between them.

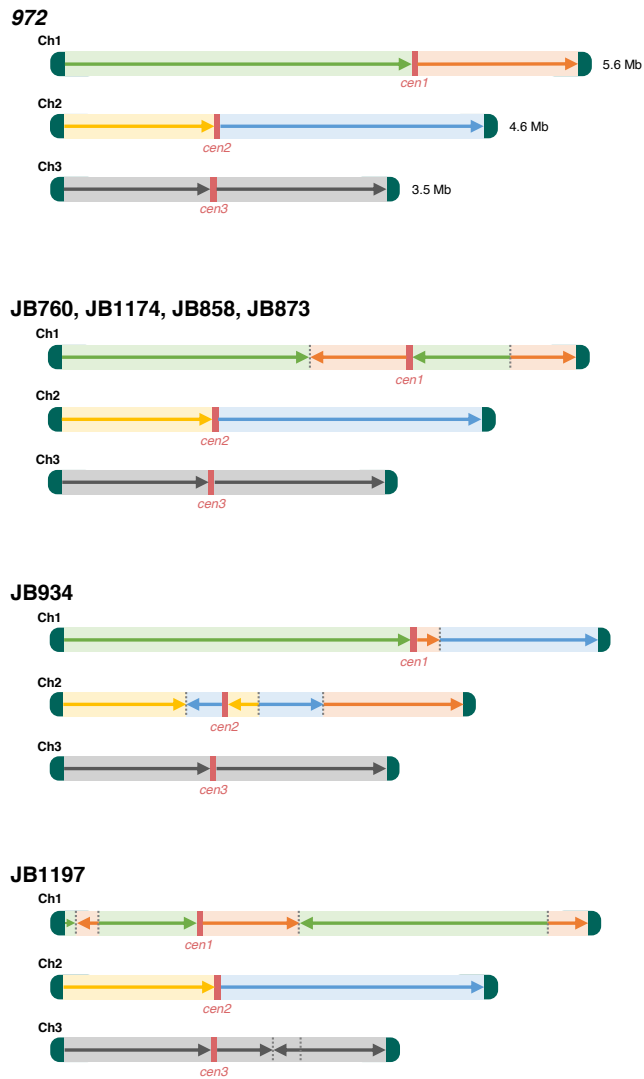

**Supplementary Fig. 4 Chromosome configurations of 972 and JB strains.**

Schematic illustrations of chromosome structures in comparison with 972. Arrows indicate sequence directions, left to right arms, in 972. Note that positions of *subtel1R* and *subtel2R* in JB934 are swapped compared with those in 972 (also see Fig. 4e).

$\alpha$

JB873-*SHIL* (216 bp)

TATTTACTCTCTTTATTCTATTTACTCTCTTTACTCTCTTCTCTGTATATCCTACTCTT  
ATATTCTATCTGTTGCCTTCTTGTCTTTTCGTTAACTACGTTTAGCGAATACTCGCCTT  
ACGTCTCGTTAACTGCCCAATTCACACATCGCCGACTCAACTTTGAATTTTTTCGCC  
ACCTTGTTTACCAAATTAACTATCCTCTACATTTTTTCATCCT

$\beta$

JB873-*SHIL* (574 bp)

TGTTAATTTTATCTTTTTTTTTCTATTTATCTTTCTATATTTATTCGTTTTTAATTCTTT  
TTTTTTTTTTTTTTTTATTTTATTCAACACTACCACATTATTTGTCCAACATGACTAAC  
TCAACTTCATTCAAATCTTTCATCCATTCCATTGATCATACACTATTTATCCTTATTA  
TACTTACTGACTTCTAACATAATAACAATAATTCAGCTTCAATCTTCAAATAATGAA  
TCTTATTGATCGCCTTATTGTTACTTTATGTATTCTAACACACTTTACCCTCTCAACT  
AATTATCTTCATTCAATTCCTCCTCCTTATTCTCTTCTTCATCTTACCTTCTACTTT  
TTCATCTTCATCTTATTTTCTTCTTTTTCTTTCTTTACTCTCTTCTCTCTTCTCTCTTCT  
CTTCTCTTCTATACCTACTCTACCTATATATTCTATATATTCTATCTCTCCTACCTCTT  
CTACTATCATATCTTCATTCCACTTTATTCCCTTATCCTTCCTTAACAGCACTTAACG  
AATACTTGCCCTACAGCTCGTTACTCTCTTCACACACGTCTCAGTC

$\gamma$

JB873-*SHIL* (242 bp)

TATTCTATTTTATTCTATTTATTTTATTCTATTTATTTTATTCTATTTATTTTATTCTAT  
TTATTTTATTTACTCTCCTTACTCTATTCCTCATCTTCTTTTTCTCTTTTACTTCAATATT  
CCTCTTCATCCTACTCTGTTACTTTCTTATTCTATTTATTTACTTTATTTTTTTTTATTT  
TTTTTACTTTATTATTTATTTCCGTACTCTTATTTTATTTACTCTATTCTATATTCT  
ATA

$\delta$

JB873-*SHIL* (68 bp)

CATTTTTTCGTCCACTTTATTCCTCGTGTACACTACATATCTTTATTCACATTACTG  
CGCTCCAACA

θ

JB760-contig 1 (1169 bp)

GGCAGTAGAAATGTGAAAACAACAAAATGAAGGGATAAATAATGTATCAACAAAT  
AAAAAAAAGTTTGCATTTATATAACGAATGTAAAACAGTAGCCAGCCCAGTCAGCC  
ATCGCTTATCAAACCCTGTTTGAACCAGCCTAAAAAGTGAAATAGACCAGCCATAC  
GAAATGACAGAAATGACAGCCATGTCAAAGAGCATCCAAGTATAAAAAGATTGAA  
ACTTTTTTTTCCAAGTTGACAAGTTTCGACTTGAACTTTTTTTATTCTCCTCCCTCTA  
CCCCTTTACATACTACCTTTGACCTAGTTTTCTCGATTTTGTAGAAAAGTGGTGCTAC  
TTTGTGAATTTTCATCCATATCGGTGCTTCTAGGGTAGGGTTTGACATTTGTGCAACG  
CAATACGCAGTACTACAGAAAAATCCACTTCCCACCAAAGGGTTTTGCCTCACCT  
TCCTATTACTTTGAATACCAAAAAGATAATCCATTTCTCTCTAAAATCTTTATGTATA  
GCGAATTTGATAAAAATTAATAATGATTTCTTTTCTTTTCTTTTCTTTTATTCAAC  
AAATTTTTTTAAAGGTTTCATGAAATAATAAGTTGTGTAACCAAACAATTCCATTTTA  
TTGCAATGAAAAAAAAAAAAAGAAAAGTAATACAATTGTTTTTTTTTCGAAATTTGTAA  
TTTTATATTTATTTAAACAATTTTCATTGAATAACAATTTTTTTATTCATTTTAATTTA  
TTTTTATTTTATTTTATTTTATTTTATTTTATTTTATTTTATTTTATTCATTTAATTTATT  
TATTTTTTTTTTATTTTATTTTTCCTTTTTCCCTACTCCTCCTTATTCATAAGTGAGA  
TACGACTCATTTTCATAACTGAGATGTCCTTTTTTCTTACTCTACGTTATTCGTAAGT  
GAGATGGCATTGACATGGCATGGCATTGCATTGAAACGATGACTCTGGTCTGTTCT  
CGTTCCATTTTCATTCCCTCTCGTTACTCATCGTTGATTCTCATCGAAATACGTTCTCT  
ATCCCTAACTCTCCCTATTCATAACTGAGATAGGACATGCCAAAACAACCGAGATA  
GACTCGTTCTCTCTCGTTAAATTCCAATTCTTACGTCATTTCCCCATCTCACAAACCA  
TCCAATCCTACCCATCTCCACCTCTA

ι

JB1174-*SHIL* (1840 bp)

AAAGTATCCCATCCATTCCTCTCTATTTCCCTTTTATTTCAATTCCTCACCGTATTT  
CTCTCCAATCTCCCTTCACCCATCACTCACTCACCAACTTATCCAATCTCTCTTACC  
TAATCGCCTACTCTTCACCCACTCCTTTCCATTCACTTGATTCACTTGTTTTACCATT  
CTTTTTTCACTTCCTCGTATTCAATTGATTTTCTTTAGCCATGTCGCTCCTTTTCATAA  
ACTGTATGGTTTTGACTTTATAATTCAAACATTCTTGTAATTAGTATGGTGTTCATTT  
GGTTAACGATTGAATGATAGTCATTTATACATTTCTTTCTTTTACAACAACAGCTAT

TATAATTTACTGTTTATTTCAACCAATTTATTTTTTTTTTAAAAATCTAACATATATG  
AAACAAATTCCTTATTGTATTCAACAACAAGCTTGCATTTTATTGCAAAATGTAAAGA  
AATATTTTTATTATTATTATTATTATTATTATTATTATTATTATTATTATTATTATTA  
TTTATTATTATTATTATCTTATTTTTATTTTATTTTTTTTTTTTTTTTATCGATCTTAGT  
GTACATGTCCCTTTATAAAAAAAAAAAAAATAAAATAAAATAAAATTCTCTTCAAAA  
AAAAAAAAATATCATCAAACCACAACATATTGTGCAATACACTTTTTATAATATATTT  
TCAATACTACGTGTAAAGTATTTTACCAACCATTTTTCGTTTTGTCTTAGTATTCAAT  
TTAGTTCGTAATGTGCGATTACCAAATCCATCTTCTTTTGCCGTATTTTGTAACCACA  
ATATATAACTCATCTTAGCATCGAACACTTCTTCAAGAACGAAATATGCAATGCTA  
ATAAACGGTGATACTTTCTATCAATTCCTTAATATGGAATATCATGCAAACAACATT  
TGAAAATGTTGCCACAAATAAACATCCTTCCATTAATTTACATCGTTAATTAGCAA  
TTGCTTGAAGGTATTTTTTTTTTTTTTGAACACTTTTGACAGCATTGGTCAGTTGGGAT  
GGATGGTAATTTGACAAGGCACATGTCTTATACGCAACGGAAAAACATTGCAAATG  
TTGCAATTGTCCCGTTAATCATCCACTGAGTGGGAAACCATTTTTTTCTTGTTTCTG  
CATGCATTCTTAGAAGATGCGCAGGAAACTTTTAATAATAATACGATGTCGGCTCA  
ATTACAATTATTAAGCGAAACGAATGACAAATACTACATATCATAACATCGTTTACC  
AATTGTAATCGTACTGTTTCGTGAATGCTGAGAACTTTATGTCTAGTGTACTAGCAC  
TTTTTTAACTTGCAACGCTAAGCATAACCAGACGCATAAATAACATTAAGCCAATGG  
CATGGCCATAATCACTTACTTTAAAGTCTTCATCCAAAGTTACGTACGATGAACATT  
TGAACATCGTACAACAAGCTGGTGAACGTGGTGGTGGTGGTGGTGGTGGTGGTGGTGGT  
GATACTGTTAGTCGCGCTGTGCTGGTGGTGGTGGTGGTGGTGGTGGTGGTGGTGGTGGT  
CCATTCAACTTGGCAAGTATAAGACTTATGTGTGTAAGCGGTAAAATTCAATGAGT  
AAACTCCACTAAAAAAATTTTCACAACCTCGATCGATTCTTTTGAGTTTACAAACAT  
GAACTTTCAAGTTACACCTTTCCATTAACATGTTTCGTTGATTGTGTGGGTGTCGAT  
CATAAGAATGTTGAACGAACTGTCTAATGGGGTAACAAAACAAATTAACAGTCTT  
TCTCATGAACTTGAAAACTTTGAACTTTTTTTAGTTGGTTCATAATTCTTGCACGCT  
GTAGTACC

K

JB1174-*SHIL* (1193 bp)

CTGAACATCTTGAGTTATGAGAGATTTCGATTAGTATTTCAAACGGCCGAACCATTG  
CATAATATAATATCTCAATGCCACAATAGAAAGAGAAACGGGTAAAATCGAGCAA  
TGGGCTTTTCAGCAAAAAAATTTGTTGCGCGTTTTATCGTAGTACTAAAAATCATC

AATCTTCCCAAGTAAACAAACAATTGCCTTACCGAGTCTTTAGAGTTTTGAAATGTC  
CAGTACGATTGTTCTTGAGACCTAGCTGGCTGTCCTGCCGATATTGTGATTAAGG  
TATAGTAACTCATTGAATTGGGACGCGAGTTGTCTGTATTGATTCAAAGCTGGCAC  
ACACCAGGGAAGCTGCTTTGGGACGAATTGCAACCTGTTTTGATTTCTTCCACTAC  
TTGCTGAATATTGGCTTGAGTCACTGTGGGAAGGTACTTTGTCCGTAGTTCGCCATT  
AATAAGAATAGTGCGAAAAATAGTCGAACCCACTTTTGAAGTTCAACACAGTGTT  
TGAAGATTGAATAATTATTTTTGTATTGTTAATGTCATCCTTGATAGAAGTTAAGAT  
AGATAAAGGGATTAGCTTTTCCACATCGATGGTAAATGTCAAGTCATGAAAGATGC  
TTTGTAATTTGGAAAACATTGATTGATATAGCCTTTTCAAATCATCAAGACTAACT  
TGTACAAACCATTACATGATCGCTAACATGTGGGTATGCAGAGTTCACTGGTTTG  
AATAAAATTTCTGTTTTTGATATCGCTGCATAGTCTTGAGCTCTTCCTTCTGTTTTGT  
TAATTCGATTGATGATTTTGTGGTGTACATAGTAAGTCGTAAACATTTTCGATTCC  
CACGACGAATATAGCAAAACAATTTGTGAAACAGTTCAGAACCCTCCGATTCCATA  
TCGGTCATTGTCGATAAATTTACTTTTCCTTCTTTTATCAAATTTTGAAATTCGTAAA  
TGCCACACAGTCTCAGTGAAAACAACAACGAGAAATTAACGGTAATAATTCATAA  
GCATATCGCGATCATCCATCTTCATAAATCGACGCACAAGCTAGAAATCTATTGCA  
AGGCATATCCACAAGTTCTTCATTGTAATCATATCGTTTGAAAAAGGCCAGTTAAG  
AACATTGTGAACTTTTTCCAGTACCTTGTATATTCTTTAAAGTAAGTTGCGTACA  
AACT

$\lambda$

JB1174-*SHIL* (1015 bp)

TCCTCTACATTCTCCCTTAGCACACTTCCTTCGTTTCCTTCCAAAGTGCGTAACAAA  
AAAGAAAATGTACTGACTTGTTTTAGTGCATAGTTTTCCACTGTTGCTCCTTGTTCT  
AAGGGTGGAAAGCCTCTTTCACGAATATTGTCACCTGCATCTTGGGTAAATAAACT  
TTTGGTAAAAAATATCCATATTTCTTAGGTAATCCTGTAGGTTTTTTTTTGTGTTATT  
ATCCGTCCTGAATACTTTTTGCGACGACAAATGTGTGGGTAAAGTGTAGGGTAGGG  
TTGATATTTCTCATTAAACGCACTACGCAGTAGCACACGTTTTCCACTGTATTTTCGT  
GTCTCTCCTTCCTGTTTGCTGTGATACTAAAGCGATGTAAGTCTTCAAATCGCTT  
GATAAAGAGAAGAAAAAAGATGCAGCAGACTTAAAAAATGATAAATAGTATGT  
TTAATGAATAAAATCGTTAGTATACTTGACTTTCATCAAGTACTCACACTTGTGCT  
TATTGTCATTTTATTGAACATGAAACATAATTTGAAAGCTACTCTAGTATTCATTTTT  
TGCGAAATCATATTTTTTTGTGAATTTTTTGCATGTTATAATTTATTTACTTATCTAA



TTTAATTTGAATTAGTTTTGTTCTATTTATTTTATTTATTTCTACTCTAAAATCACATT  
TTGTTTTAATTTATTTATTTATTTATATTTTATTGATCCTTTTTTTTTTTTTTTTTTTT  
AATTTTATCTTTTTAATAATAAATTCAATGCACAATGGTTTTCTTCGTACAACATTGTT  
TCATCAACGACTTGTTAAAAATAAAACAAGTAATAGCTCCTTGTTTACTTATTATTA  
TATGAAACCGAGATGGTAGATGGACTTCAAATTGAGTTCATTTGTGGTTCCAAAAA  
AACTCCATTTTACTACTTTACCCCCAGATTCCGCATCATATCTACAACATGATCGT  
AAAGCTTGAAATACCATTTACCTGTACTTTGGCAGTTATG

μ

JB1174-*SHIR* (551 bp)

CGTACGCACTTGTAATATGTAAAAAACGATCCTTTGCGTGCCATATCGAGTATGG  
CATGGTTCTTTCACATCTTCTACTTTGTGTTTTACACGAAAATAGTCAACTTGATCA  
AATCTCGCCTTTCATTACTTAGTTGCTTATACTAATGAACTCATGTTGATATTGTTTT  
GCTATGTTAAAAATATATATATATATATATATATATATATATATGTAAACCTAAATACAA  
TGTAACACTTGTTCAAGAACGAAATATGCAACGCTGATAAATGGTGATGCTTGCGG  
TTTGTCTTAGTCATGAATTCATAAAAGTTTTATCTTTTACATCCGAATCTAAAAATT  
TGTCGGCTATTGCTTGTTTGTAATCCGTTATATTCCATGCATGTAGTACGAATGGTA  
TCAAAGTCCC GCGTGACCAAGTAGTACATAGACGAGGAAACGCTCCGTACGCTCCA  
TTATGCTCCTCATGATTAAGACAACAAAACAAACAAATATCTTGGTATGTAATGTC  
ATGCGGGCAACACTTGTAAGAGTGTTGTTGAAAACAATAA

v

JB1174-*SHIR* (573 bp)

AAGTTTTTTGTTTTAACAAAGTCGACCGAGTTTTTAAATCATCTTTGAATTGCCTCTT  
TGATGGGATAAATGTATGTGGGCTTTTAGTGTTATTAGTGCTATTAGTGACAGCAGT  
ACTACTACTATCAGTAGTAGAAGTGGCAATACTAGTACAACACTAGTTGTATTTGTAA  
CAGACTTTGCCGCCATTTTGAACCACTGTTGGCGAAAAATCTACCAACGTACCACT  
ACTGTTACCTCCATTTCTTTGTCCGTATGAAAAGCTCCTTCCGCTGCCAGAACCTC  
CTCTGCCTCACCATCCTCGTTGTTCTATATGATTGAGTGGCGAACACGGTAACAAAG  
TCGATATTCAAAGTTGTAGAATTCAATTTCGATTCAAATTCACAAAGACTTGTGCAT  
GGTAAACATCTTGAGCACTTGAGTGCATTTGGTAAAAGATCACACGATACAAACGT  
ATTATTCATCCCTAATCCTATAAACGCTCGAGCACACTGTTCTTTGTCGTTTATAAA

TGATTGCATATCAGTATCAATATGCAGTTTTTTGCAAGTTTTGAAACTCCTTATACA  
ACAAC

ξ

JB934-*SH2L* (1457 bp)

ATTCATAACAGACTTTGTCCCATTTCGAACCACAATTGGCAAAGAATCTACCAACGT  
ATTACTACTGCTTCCTCCATTGTTTTATTTATATAACTGGCTTTGTCATTAATAAACG  
ACTGCAAAGCACCCGTTGTTTACCTTTTCTCCTACTAGACCTGTTTCCTGAGCGTA  
ATCCATCACGTATCCGGTGCTCCATAATGAACGCCCCGACTCGGCATCCAAAAAG  
TTGTCCAAGATTGCTTCACTTCCTTTTTCGTCCTACAACATATAATAGCTCGATTGT  
TTTCTCATCACAACGATAGCTTTTGTAAGCATGACAAAGTCTCATGCCTACTCTA  
CTACTCTATCTCCATTCCATAAATGATTTACGATCCAATGGTTGTAATATATATTGAA  
TGTTGTTTTTGTGGTCAAGATCGAACTGTTTATGAAATGGGTACAAAACATTTCT  
GTTAGTGTCTTTGCATGTGTGATGAAAACGTTGTTAAGATTGACTATGAACAACAC  
ACTTCAAGTATGATCGGTAAGCACAGTGTGAGCTTTAACAATCAATACTCTCGTCA  
ATCACTACTCTTGCCAAACGATTGTTTCTAAAAAAGCAGACAAGTTTCAGAAAAAG  
CAGAATCAAAGTCAAATCACGGTATTGGGAAACGAGACATAATTCTGGGTGTG  
AATTTTTAAAACATTTCCAATCATTACTGCAATTCAAACCAGCAGCATGATTTTGT  
GCATCATGCCCTATTTCAATGAAATGAGCAGAGACCACTTTTCTTTCCATATAAGC  
TGGCAAAGATATGTTAACAACCTTCCCGCACCCGTCGGTAACACTACCAGCATGT  
TTAGTCGACGCAACAAAGAATATACCACGGCCCTTCCTTGTTCCACCGACTTGAAC  
GTGCATTACTGTTTTCGTAAAACAATCTCAGACTTGCGATACAACCTTTTATAAATCC  
TTTTCGGTGGGCATATCACTGGTTGTGCTTTTGGCGTCCATGAATATTCACATGATA  
CATCTCGGGTGTGTTGGTTAGATGAAACGGTAGTAGACGAAACGAATTCTGAAAAT  
GGTTTTGACGACAATTTGGTTGAAAGATTCGTATTCAGACTAGTTGTTGTTTGCATG  
AGTGGGACAGACCGTTTCGATATCCAATAACTCCTGCCATAAAGAACTCGCTTTATA  
AAAATTAGTAAAAAAGTTTGTGGGTAAATAATTAATTCCTTCATCCAATCGCGCAT  
AAATATTCAAAGCTGTTGACCTCGTATGACCAGCCTGTAAATCAAATGTAGAGTTC  
CCTTCCTCCTGTTTTTCCAAATTGTATTCTTTAAAAAATGAGCAATGTGTCTATAGT  
TACGAAAACCTAAAGATTTCTTATAACAAACAATTGCCTTATCGAGTTTTTAGAGTT  
TGAAATGTTCAAGTATGATTGTTCTTGCGATGTTGCTGGCTG

O

JB1174-*SH2L* (4838 bp)

TCAATTTTCATTATCACATTTATTGAAATCAACTTATGAACAACCTTGCTTTATGACA  
CACAGATTCTTAGGTGTTGGTGTTTAGCTAGTTAATATTGACGAGAAGATTTCTTCA  
ATAAAAGTTTCACAAGATGAGTGTGCTTAAAATTAATGTGTACATGGTCAAATACG  
GAACACGTTAATTTTGCAATGCGTTGTGTTTTTTTATGAAATGCAATCAGGGCGGAA  
AGGATCAAATTTATTTAATTATAAATAGGTCATAAACTGAACCTCCTCTAAATATAA  
ATGGTTAATATCTCATGAGCTAGGATTCAAATCCCAGGTTATGTTTTATTTACGAAC  
ATTACTCGATTTGTTGGTTTTCCATATTTTCATAGAAGGAGTTACAAGTTTTATACA  
AAATATTAACGGACATTCATATCGTCCTTTCTCACGACGACGACGATTGTTTCAGACG  
AATAATAGTGGTTCTCAGATAAATGGTACCTCAGACTCTAAAGCTGTAAAATGTTG  
TTGATTTACAAGCGCTTGATGTCAGAAATGTTGCGTTTATTCAGCTTATGCTTTAGG  
AGATGCCGCGATTGGTTTTCTTTGTAAGCATCGATGATTCCCAATATGCTACTACCCA  
CGCAAACGAGGGCACTCACCAATGTAACCTATGATACACACAGTATCTACAGCTTAA  
ATGATAAACAAAAAAAAAATATATATATACATATATATATATATATATATCAATA  
ATGTTACACTTCAGAAGAAAAAAAAATATGATATCCAATACACGGATAGCGTTTTAC  
TAGTTTTTCATTGAAACATGAGTCCGACCTTTACTACCGATACAAATGATCTCCTTC  
ACTGCTGAACCATAAGTTTGAGAAGTTTTAGGAGAAATCTTATCAGTCAGCTTACC  
TGATCGAATATTTAATTCGCTTAGAATTTGGTTTAGACTACTATGCTTTATAAGCAA  
ATAAACATGTGTATATTCGCTCAATGAATATGTATATTAATTCAATTATTTTCGTA  
AACAAAAAAAAAGGATGACAGATTGAGGAAAATTAGTGAGTGACTCCTCAACAATA  
GGCAAGTCCATGATGAAATAAAAGCGCACATTGAATGTATACGAATGCAGCCCTCT  
GAAAGTATTGTAACACGGAAGAATGAAGCGTAATGCTTTGACTTAGAACTTAATC  
CTTTTATCAAGATGTCGTGCTACTTTAATAAAAATTGCTATTACCTTGCGCTGAAAAT  
ATCTCATATTTTGTTTACAATTAATAGCTTTGAAAGCTCATGTTTTTGTACCTCCTT  
CTCCCTATTAGATAATTTGATGTACAAGTCCTTCAAATTGCTTCGTCAAGCAAATAC  
GAAAGATAAAGCAGATTTAAAAAAAAAAAAAAAAATAACATATTTAATGAAAAAAGTAG  
AGGACTTGATATATTTGAATTCCACAATTATATACATTTTACTTTATAAACTCCTTA  
AATGATTAAAAACCTACATATGCAAGTTATTCCAATATTTTATTTTGTGACAAAAATA  
CTTTCTGTTATTTTCAACCTCAATCTTGTTATAGAAGCTGGTTTTGAGCGACTTTTTT  
TGATTATTGTTTCAATAACATCGGCTACTATTTTGGTATACAGCTCTATATTAATGG  
GGAAATTGATACGCTACCTACCCCAAGCAGGTCTTTGGCGACATGTGTAGAGGATG  
ATGTTCTATTTAAAGATCATGATGTTAGTAATATTTACCATAACAGAGCAGGGGAT

GACTTTCAGTACGTGATTATAAAAATGGGGTTAAGAACTGTTTCAGGTAATCCTGTG  
AATACGCGCAGTTTGGCATTGGAGCTTACGATAACAATCACAGAAATACTATAACCTC  
CATGTTTTTTTTAAAAGTATTCAGCATGTAATTACTTATTATGGCTTGTAGTCACGTTA  
CAACTGTCAGAAAGGCGGGAAGAGACAACCTAGTCTTACAACCTCACGCGTCAAAG  
TGTGTTGGAGGGGTGGATTCAACATCTATTCTGTAGTTGGGCCATACTTGATTAGTT  
GAAACCTATTAATGATTGAACGTATTGCAAAAATATTCTGAAACAATATATGAATTA  
CGAAAACAAAAGAAAAAATAATGACATGGATGATCCAACCGTATTTGTTTAAAAA  
AAGAGAAGAAAGTGGTAGGATAAGGATATAAACAAAGTTTTACCAATTTGACCCT  
GAAAACAATGCTAAGAGGATATTCTGTATGTCAAGTTGATGAAGAGGATTAATCA  
AAGAATGGAAATAATTGGAAAGTAGTATTATATCGAAGAAAAATGGGAAAGCAAA  
GAAAAGAAAAGAAACGTCTTTAAGGTTGAAAAAGCATTTCGATAATTTATACATTT  
TAGTAAAAGACGTTATGAAATGGTATCACAGGCTGAACTCTCAGAATTCAAGTGCT  
TAATACTCTGTCTTTTTTTTGACACTAGTGCTCAAGTAAATGCTATAACAAAAGAAAA  
TTTTTAAAGCCTGTAAATTATATACCAAACCCTAATCACAAAATGTAACGTATGGTG  
CTGAATTACCTCATTCAATAAACAACAGCCTTGATTTATAATATCGTGTCCAA  
AGTAGTGTTAAGTAGATACTTTGGCGAAGATCCAACCTAGTTTATGTGACGACTTTAT  
TGGTTATTTTACAATTTCCAACTAATTGAAAATATATATAATTCACCAATAAAAATA  
ATACAAATGATCCCAATGATAAAAAATGAGCGTAAACTTAATCTACAAGAACAGC  
AGTGGTCACCAAATAGACCCATAACAAAGGAAAAGTAAAACAAAGCGGTCAAGAAT  
GGAGCTACAAGTTTACGATGTTAGTAATACAAATTAACAATATCATAGAATAATAC  
TAAGATTAAGAATCTTTGACTTAACGCGAAAAAAAATTTTTTTTTTTTACCT  
TTTCTCTTCAGAATTTTCATTATCCAAAATAATTCCAGAATTCACTTTTGTTCGACCC  
GTTACATCCTCAAACAATGCAATCTTTATGTTAGTAACAATTAATTTATGGTAATT  
TTCATTCTGGTAATAACATAGTCAGTCGATTACCAAAGAACTAGGACCAAAGGTC  
CGTATATATATATATATATATATATATATAGTAAAACAGACTAACCGGGGATTGTG  
GTAGATAAGAAGGTTGGCTGCTTGAGTTTACGTCATAAAAAAAAAGTGTAATCAAC  
CAAAAGGTTTTTTGTAGCTTGAGTTAGTCTTCGCCCGCTTAATAAAACGTGTCTGA  
TTATATTATTTAACAAAAGATAAGTGGTAAGAAATATTCATTCTCGGATAAAAA  
AGTTATTTATATTAGCACAAAGTCAACTCACATTAATAATGAATACTGCACTTTTGATT  
ATCTAATTCTTTTGAACGCCCTTGAACGTTTTAAAAATCTTATGATAACTACCCGC  
TCAAGTGCCATAGTCAATCAGGATGAAAATATCTAGCTACTATATGATATATAATTT  
TCTTCGAAATTTTAAACATATTGAAGTATTCGTAAACAATGTTTAATTCAAAGCGGA  
TCACAATATTCTGATTTTTTTTACTGACCATAAGTAGCGTTGAAGCAATCAACCGTTC

CTTCACTGAGATGAATCTAAAAAAGAGTAGAAAATTTACGTGTAAC TAAGAAAATA  
ATTTTATAATGTTAGACTAATAAAAATTGCTCGATAAAAAGTTGTTTTTAAAAAAGTTA  
TACAATGTAACGTTTCTAAACACTTTAATCAATATAAAAACAACAAATGCAA ACTAT  
TCTAGTATTCATTTTGTGAAATCATATTTTTTTGTGAATTTTTTTTGCATGTTAATTCA  
T TACTTATCTAATTTAATCCTGTTTGGTTTTATTTTATTTATTTCTATTTTAAAATTAC  
ATTTTTTTTTTTGTTTTACTTATTTACTTTTATATTTTATATTTTATTGATCCTTTTTTTTT  
TTTTATCTTTTTTAATATGGGTTCAATGCACAATTGTTTTCTTCATAACAACATTGTTT  
CATCAACGACTTGTTAAAAACAAAACAATAATAGCTCCTTGTTACTTATTATATGA  
AACGGAAATGCCAATTGAGATGGTAGATGGACCTAAATGAAGAGTGAATGTCCAA  
CCCCACTTACGAACAGCATTTCGACTCCATTTGGGGTCAACAAGTACTAGGTACTTG  
ACAGCCCCTTGGTAAAGTCCTAGCGTGAATTCAGCTACCCCTCTTTCCAACAAAG  
AAGCAAACATATATTATACTAACTTTTTGGTTAATTTTTTTCAACACATGTTTGTAATA  
TAACTATGAGCTGCACAATTATCAGTCCTTAAAAGGATTCATAATCTATGTCATTAG  
TCCCATGCTTGCTCAGATCACCAAATCGTGTAATTTCTGCTTGACAATGTAATTGT  
AGGGTATTTCCATTAAGTAAATTGCTAGCAGGTAAAAATGTCACGGTTTATAAGTT  
AGGTCGAGATAAAGATCGAAA ACTAATATGGCCAGTATTATTTTTGTGTCGTTTAC  
AATCAACAAGTGCTAATTTAAAATATAAATATAAATATAAATATAAATATAAATAT  
AAATATACTAGCTACTAATTTAAAACCGACAAAATATATTGTATCAAAAAAGCAATA  
AGTGTA ACTATTACATTACTATAATGTTGTAATAACGTAGCAAAAATGTTAAAATTT  
AGAATTCGAAATATTTGAGCAAAATTATTTTGAACAAGACAAAAAAAATCATA C  
TAAACATAAGGCTTTTTTTACTGCCTATCTCTTTATACGGTTTCCACACATAATCG  
AATATTAATTTTAGGAATAAATTAATG

$\pi$

JB1174-*SH2L* (570 bp)

CGGTAGTTTTAACGTAGTGCAAGGTAAATGTGCATGTTGGACTTGATGTATTGGGG  
TAATCTCAATATATGTATGTACCAATTGTTTTTTAAATCGTATGAACGTTTTACAAC  
CGACTTTGGTTTGTGGAAGCATATAGAAAATAATTACTTTTTTTGATTCGTTAATCAT  
AATCGAAGCAAAGAACTTTGTGCTTTCCAAATATGGATTGACTTCTAGGAATGAT  
ATCAACTTTGAAGGATAACGTAGTTTCCACCCCTAAGGTTGAGTAACGATAACATT  
ACCACATTGGAGGGATACTTTTATCTCTTCTTTTCATTTTCTTTTCTTTTCTTTCTTCTGT  
TATGTTAAGCTGACTCTACTTTGTGTATCAATGAAATGTCACAGGTTAGAACATGAG  
TAAAACCCCTTATATTTTCGGCTAAATTCGAATAAACAGGAATTTTTGGATTATTGTG

AAAGAAGTAAAACTTAGATTTAAGACTGAGAAGATTAGCGAAGGTTTAACTATC  
ACTAATGAATCCACATGATAAAATAACTCTTCTTGA ACTATAATAAAAAGCAAATGC  
CGA

ρ

JB934-*SHIR'* (6406 bp)

TTCCGCAAATACGGTAGGCAGGAGTCCTAATCCAAGAGATTGGATACCTTGATCAT  
GAATGCTATTGACGAAAACGGGAGAAGAACCTAGAATAGAAAGGAGTTGTCCGGA  
ATGAGCAGTAACAGTATGCGCAAATCATCTCTTTCTAAGTTTGGTCGATGAATGTC  
TAAATACCCAGCATTGGATACTTTTTGACACAAAGATCCTCCAAAATAAACATTTAT  
TAGTTGGAATCCTCGGCATATGCCCAATATTGGGAGTTTACGTCTCATTGCTAAATC  
GACAATTGCCCACTCAAATTCATCTCGTTCAATATCCATTGAAATAGAAACATTTTG  
GTGAAATTTTTCTCCATATCTCCTTGGATGAACGGATTCACCTCCAGTTAATACAAC  
TGCATTGATTTGTGCTGGTATCTTGCTTATCGGAAAATTTGGATACACGACGATTGG  
TATTCCACCAGCCTTATTTATGGCCTTGATATATAAGGGTACTATATTGGAATAACC  
CACACTTAGAAGAACAACAGGTTTTGACATGAATCACTTGCCAATTTTTATGCAAA  
GAAATATGAGAAATGAGTAAATGAATAAATGAAGAAGCTGTTATGAAATAAAATT  
AAAAAGAAAGTTCTTCTATTTCCAGTTTTATAAAAAGAAAAACGCTAATTGTATAC  
TCAGTATACGTTACCCCTACCAAAGAAAAGATAAATTTTTTTTATTCACGTTACGCTG  
CTCATGAATATATAGAAAATCGGCTACCTTATTTGCAAGGTTTTTGCTAATTTACGA  
ATCCCAGCTCCGAAAAGATTTTGTCCATTTTTTCTACATAATTGTTCATACTTAGCA  
ATACCCGCGAGAGTTGTCGTGATTTGTATAAAATATGCTGAGCTATATTACGAAAA  
TACTGAAAAAAAAGATTAAAAATTATTAACGGTTAACTATTGATTA AAAAGTGAA  
AATATTTAATAACCGAAGAAAAAGAACTTAACAAACGAATGAATTTAATCGTTGT  
GCTAACGTTTACAAATGTTACCAAGTAGAATTGTAGGGATTTAATTTTACTACAAC  
TACGCAGATCGGTATTTGTTTTACGACACGTAAAACCTGCTGTGAGTTTATTTGTGAT  
CTAGTAAGTAGCGGTAACCAGGATGTAGGAGTTACGAAAGTTATAATTATTGTTAA  
AAAATGAAAAAGTCTTTAGTTATAACTCATGTTTAGCTCACAGCTTAATTAAGGAA  
CAAGATTTAGTGGGAGCATTATTGGCAGCAGGTCTGTCTCAATATCAAATTGACTA  
TGAGGCGATGTATCAATCGAGCATGCGATACATGGTGATAGGCAATGCAGTTTAGT  
ATTGCTAACATTTACGACTTTATTACATAGAGAACTACTAGTTAATTATTTAATAA  
AAAAAAAATATGTTATACCTTATCTACGCTATTGTTTTTTTTATCTCAAACAAGGAAA  
ATTATACTTTTGAAACCCACAATAATTTGATAAAAAGAATAATTCATGAATTTGCACT

GTGAAGCAAAGGTAAAACGTTTTGCTCATCTCAAAGGAATATAAGATTGGATTGCG  
TTGAAAAGGTGGTATCAATAAAGCTATAATCTATTTTATTTGTTTTACTAGTTATT  
TTCATTTTCAATACTTTAAACATTTAGCAAAAATATTTTATAATGGTTAAAGGAAACG  
TTTTCGCTAACTAGCAAAAAAAGCTGACGTATATTTTGAAAGAATTGATATACTAA  
TAAGAGCATTAAAAGTTGTTCACTTTTTGATTCCGTTTCGAATCAACTTAATTAAG  
GAATCCGGTTATACATACGAGATATAATCCTGATAATTGCTAGTTGAATAAATAGT  
TTGCTAGTAAATTTAAAACAATTTGGTCAATGGCTATACAGAATAAGCTACTGTTCT  
TTCAAATGGTATTTATAGAAATATCGGAAATAAAACAAATAGGAGCAAATTGACT  
TAAATATTCTTTATTTGAACTGACTCATTTGCATTTATATTTGTAACGTTTAAATTTT  
TATTTATATTACATTTTCGAGCGTAAAGTCTTATTTTGAATTTCAAAAACCTTGGAGC  
AGAGAGTAATTTATCTTTAATTTTTGGAGATATAAGTGTATGATGATATTTCTTATT  
TTTGTAGATTCTATTTGTTTGATTATTCCTTTTTAACGCTTATTATACTCGCATCATT  
TAGTCATCTTTACTATACCGATTTAATCTTTTCCATACTAAACTATTGTAAAGTAAT  
TAATACAACAGAGACATTAGACATTTGTCGAAATTCATTTAGGCTTTAATATTCTAA  
AAGTTCATTACCTCCGATTTATTA ACTATGAATGCGGTCACTTTGTATGTATCCGA  
ATACTTCATATTTCTATAAAAAGAAAATTGACGATTCATGTTTGAAATTTAGAACAAG  
AGAACTAAATGATTA AAAATATTACAAAAAATTTCTAATACACAAAATCAGATTAC  
TATTTGATGGCCATTTACGCTTTGCTTAGTATGTTGAACACATTATTCTTAATGTGAC  
GATATAAAGAGTATGGTTTCTTAAAATTTTTAAAAAAAAGGAAAGAATAAGCGA  
GTTGACATTTACTTTGTTACTCAAGACTCACGATGAAGTTTTTTAACGGCCTTCACT  
ATAATGCAATTTAAGTTGCGAATGATACATGTATTGGGAATGCACTTAATAAAAAG  
ATCGCTTCTACATTTACATTTTTTATGCTTTAAGTGTTCAATTTTCGACCAATGGTGG  
AAAGGGTTAAAATTGCCAATTCGAAAATTATAATTATCCTAGAATTTTCTGAACCC  
AGATAACTTTACACTCAGTTTAAGATTGTA AAAATTAATTGTCATGACATAAGTATAC  
GCTACGCGAATTTTTTTAATAAGTACTTGATAATCAAAGCGAGCAAATGTTTGGCA  
AAAATAAATTAGATACTATGCTTACGAATAGTATCGTATTTGACAGTGTTTTCGCCA  
TCCCCTTTTGACATACTAAGTTGACTAATTTTTTCATTGAAAGATATTA AATAGTGA  
AGCAAGTTTAAGCTACTACTTCCAGCATCGAACGTTACGATAATGATTTTGGGAAA  
TATTA AATCAAATAATATAGGTCCCCCGCTCAATGCTCCTTATTTGTTATACTAA  
TTTCGTGTTACTAGTGTATGTAAGTATGCAATTCCCGCTCTAATACTTTTTGGACTA  
GATTTTTTTTTTCATTCTTAACGCAGAATTTTCCACTTTACTATTGCTCTCAGAGCTAC  
ACAAATCTAAAGCTAAAATGAGTACACATAAAAACCCATAGTCCATTAAGTAAAATT  
TTGGACAAGACTTGTGAATTGTTTTGTATATCAGAATGCTATGAAATTTTATAGCAA

TCAACTTTGCTTATTATATACGTTTTATCAAATTAGCTTTCTATCATCAATACGTTTA  
ATATTTTGAAGGATCGGATTTTTGGAAATTTGGAATTTGCTTTACGTATTTGAAAAA  
AAGAAAAGAAATCAGCAGCCATATGCAACTAAAATGAAAGCAAATAAGTAAAACC  
TCACCAATAACTAAAATTGGCCAAATAAACTTTCAGCAATTAGTGGAAAGAAGGCT  
CCAAATAATAGTTAAAAATTTTTGACAGTTGCCAGTGCCTGTTGAATAAATTCAT  
ACGTATCAACTACACAAATGTTAAAGGGATTAGAATCATAATGCATCCTAACCTAA  
AATGGTTGGCCCAATCACAGGTACAAACCAACAATTTTTGTATTGGACAGTCCAGC  
CAAAAAGAAGAATACCAATTTTCAGAAAGTGTGATCCCAATGAAACCCATGGGAAG  
CTTAAATTTGGGTTTGCTTTCACCTTTCTTCGCTTTATAAGGTATAAGTAAAGTTTT  
TTGATTAAGGTAAAGCGGTGAAGACCGCTGCAAAAGGTTTCGAGGATAGTGGAT  
ACATACCTTAAACCACTAAGTCCAAAATTAATAATTGCAAAAACAATTTCCATACTTC  
GGAAAAAAGCTGTAAGTACCAAATTCACCATCACATATATAGAGCCAATCGTCAAG  
GCTATACAATTGATATAGGTTGCGATATTAGCATGTGAATTAGATTTTTTCATACTTA  
ATAAAGCTAAATACTTCTTTAGAAATTGCTCGCCAGCAAGACGAAATGCCACTGGT  
TCATTTTCTCCTATATGACCATACTTTTTTCATTTTTTTTTAAAATTATGAACAGATAAG  
TGAATTTTTTTGTAGTAAACTAAAACCCAACAAGCTTAAATTCTGATAAAATTTAA  
CGAAATTAAGCTCTCATTGCCAGCCAATTGAGCTTTGTCTGATGAATCATGAGATT  
ATTGTAGCAATTCCTGGGCCGCTGAGAGAAGCGCAAAAAAAAAAATTACCATGCCT  
TTCCCTTTATCCTTTTTTGCCCGAACAGGTTAGCTAGTGAACCAGATTCATTTGGTAG  
GCCAACAGATCCTAAAAGTCCGGAAAAAATCCGGGATACCAAAAAACATTGGCAA  
ATTTACGGACAAGGCAACATGAATTAGTAAAAGCGCGACATACTGTACCCCACTAA  
ATATATAGACTGTCTACAAAATTTTTCACTAAGGGGAGCAAAAACTAAGTTTCCAG  
TTAACGTCCCTAAGGTATAAAGAGTAGTTTCTAAAGTGACTAATATACAAGAAGCA  
TGGAAGTGCTTTGCAATATTAGGAACACTAGGTGCAAAATGCTATTACAACACTGG  
TTTGAAAATATATAGATCCGATGACAACCACATTCTTCACTTTTATATTAATTGGCC  
ATAATTCGGGATTGCATTTGTAAGTGTAAATCCACCTGTAAAAGATATGGATGGTGA  
GTCAATTATACAACGTAGTTCAATTTCTTTTTTGAGGCTTAACTTTTGTTCATAGAA  
AATAAATGATATACAATTTTGAAATATTTCAACAGTCATTTCTAGAAATTTTTATTG  
TTTGATTAATAAAACAAATGATTTGATTAATTACAAGGTGCATCCGGCATTACCCTG  
AGTTGTCATTTATTCAAAAAAAAAAATAAGTTCAAGATTA AAAAGAATTTTTTCAGTT  
TATCCGGCACTCCACTGGATACATTTGGAAACAAAACCTTATGTATTAATTAAGCA  
TAAATAATCCTTATTCACGGAAAACTCGAACTACGGAAAGGGTTCCGCGAAGCTCC  
GCGGTAATAAAACGGAGAATGTTGAGAAGTTAGGAATATTTGATGACATGAATGCT



CTTAGTTAAAAAAAAAAAAATGATTTTTTTTCACATTTGTTAAAGTTTTACCTGTCAA  
AAATCTTATATGGTTCGGAATATTTGCAACGAGTTGAAGTGCGAGAAAAACATCTA  
TTCTAAAATGAATATATTTAAAAAATGCCAATGTTAACGTAGTGAAATTGAAAATG  
ATAAAAGTTATTTTTGAATCCGAGGTTGGAATTTTTTTAAGAAAGTAGTAAAGCCAT  
GTGATAGGCTTGTTATCGAATGAAGGTTTGATGAGCTAAATTTCCGTTTTAAAAATT  
TCCTATTGTACTAATTATTATTCTCATATGATTATGCACTATAATAATAAGAATACT  
ATGAATTCCTTTGATTTTTTCATTCATTTAATCTTTGTGCGTTCAGTGGTTTACTGCT  
AACAGTATTTTTTTGTAAAGTGTTCATCTTTGCTATAGCTCATAAGTAAATAAAG  
TATTTTTTTATATATGAGATAATTATAAGAAGCTTTTCAAAAAAATTTAAAAACCATC  
ACGAATGTCGGACTGTGCAGTTGGAAATTCATTTTCAGAAGACTATCCATATGCTTT  
AATAGTTGGAGCAGGGCAAAGAGTTGCCTCATTTCAAAAAATTCAAATAAAGTTTG  
ACTACGTGTCTAACTATAGTACAATAATAAGATTATTTGAATTTAATAAGAAATCCC  
AAAATTTCTGAATTTAATCGAGAACGGTAGTTTTTCATTTTCTATTTCGTTATTTTTCA  
TAATCAGCTTAGCGTTCCATATTTGAATGCAAAGTGTGAGGGTACACAGAATTAGT  
TTTTTAATCTATAAATGTATAGAATCATGTCAGCAAAAAAATGTTCCAAATAACCGT  
ATCACCAACAAGTTATTGTAAGTATGATATATTAGGACGTTGTATTCTACGGCTTAT  
GCAAAAAAGCAAATATTAAGCGCAAATATTTAAAATTGCAATATTAATTGGAAA  
ATTACCCGGACATATTAAGATAGTTCGTAGATCAAAAAAGGTTGTCAGTTATTGT  
TAACACCAAAAAATATAGACACATTTAAGTCGGTAAATACACGTTGCCAAATGATT  
TTGTCACAAGTTCTTTAAAATTCAAATACAAGTTTACCTAACTTAGACCCAAGTGA  
CTTTTTAG

σ

JB858-*SH2L* (450 bp)

TGGGGGGAGCAGGTAGTTGTCGCTCATTAGAAGTATCGCAAGCCTCACTGTTTGCC  
TCAACAATGTTTGCTTTATCCTTTATCTCATCCTGAATGAACTTGTCTGTTTCATAGA  
CGACAAGATCATCGTCTTCATATCATCTGCTTAATTATTTTTCTTTATTATATAATTG  
ATGGTTGGAAGTGAGTATCGACATTCCTTGAAATGTTCAACGATTCTTTGTACGTTA  
ACAAAATGCTTACATACAAACAAGCAACTGACAGACACCCACTTTGTAAAAAATAT  
CCGTATTTCTTATGTACTCTAATCCCTTCCAATAAAATCGGGTGAAAGCAGCAACAA  
CGAGTGTAGAGTCGGCGGCTTGATGAATTTGAGCTCATACTGCACCGCTAGTTATT  
GCCATCGAAAGTATTCGTTACCAGACTTCGCCCATGCATACTATTCTTACG

$\tau$

JB858-*SH2R* (1280 bp)

GAATACATAAGCTTGAATGAAAGCAATACCAAAAAATACTAATAAAGAAATCGCT  
CGATTATCTTTACGCTTAAGTATTTCTATTTGAATTGGTGCTACTATTTTAGGATTAC  
AGCAACATAAAGCTAGGCGAATTGAGTTTCTACGTAATAATCTACTTGGATGTTGC  
TCGCACTCGTAAAAGCAAACCTATGAATTAAAAAAAAAAAAAAAAAATATATATATATAT  
ATATATAAAAGAAAAATAAAATAAGATTGGTTTTGTACATGCTAAATTTTCAGTCT  
TCAAATAAAATATGATGCGTGAACAACCATTTATTTGTGTTTTCTTTTTCTATAAT  
CAATCTTCCCACAATATTTCAATGTTAGCGGTATGCAACGTGGAGCACGGAACTC  
CAAAACGAAAGGTATAAAAAGCTAATCATTCTAATCTGCGTTTCCCTTGAGCAAG  
CATCATTTATCAACTTTTTAAAGATGCGTCTTCATGGAGCACTACTATTAATTTTAG  
GCAATCTTGCTTTCCACACTTTAGTTAGAGGTGAAGTAGACGTCAATTCAAGTTCTC  
TTACTACTGAAAATGAAAATCCTACTTATGAGGAACTAGGTTGGTTCGCCTGAAGGC  
ACCAGGAAGCTTACGCTTAAGTGCAGTTGGTTTACTGCGAAAAAATCGAAATTCAA  
GAGTTATGCTGAATTTTTTCGTGCATACCTTCGATGATGGAGAAGTTGCTTTATCTTT  
TTTCAAGGCAAATGAATGGCAGGATGTAATTGGTTGGAATGAACAAGTTGAGGAG  
ATGATCAATTTTGCAAAAGCAAGAGATACGGTGGTTGAAAAGTCTTTTTCTATGGA  
ATCTTTTTTCACAGGATCAAGCGGTGGGTCCGTTTGTATATCTTGGTGACTCGAAATC  
TGTATGGACGGGTGATAATAGCATTACAAAACCTCGTTTGGTAAATGAAACCGGTTT  
TTACTGTATAGCTGCTAGACCAATGTCAACAGATGGACCTGAATTTGCTTTGGGCG  
AAATGAGATATTTGGATTGGTACAATGACAGTGAAGTTTATCATCACCAAGTTAGT  
ATTTTCGATTATATTTCCCTTATTACAGATGGGAGGGGTATTCGCATTTTTTATATATT  
GGATATGGGCTTGCTTGCATTATGGCGGGATAATTCTTCCCTCCCAAAGATAATAT  
GCCTTTATATTTTTCTTTTTTGCATTAAACGAAAATTTATGGCATATGTTTTCGCTAC  
CATTAAACATTTCTCTCTATGAAATTAATAAATAATGC

**Supplementary Fig. 5 Homologous box sequences shared by the subtelomeres in JB strains (except for JB22) but not in 972.**

Representative sequences of black boxes ( $\alpha$ - $\delta$  and  $\theta$ - $\tau$ ) are shown.

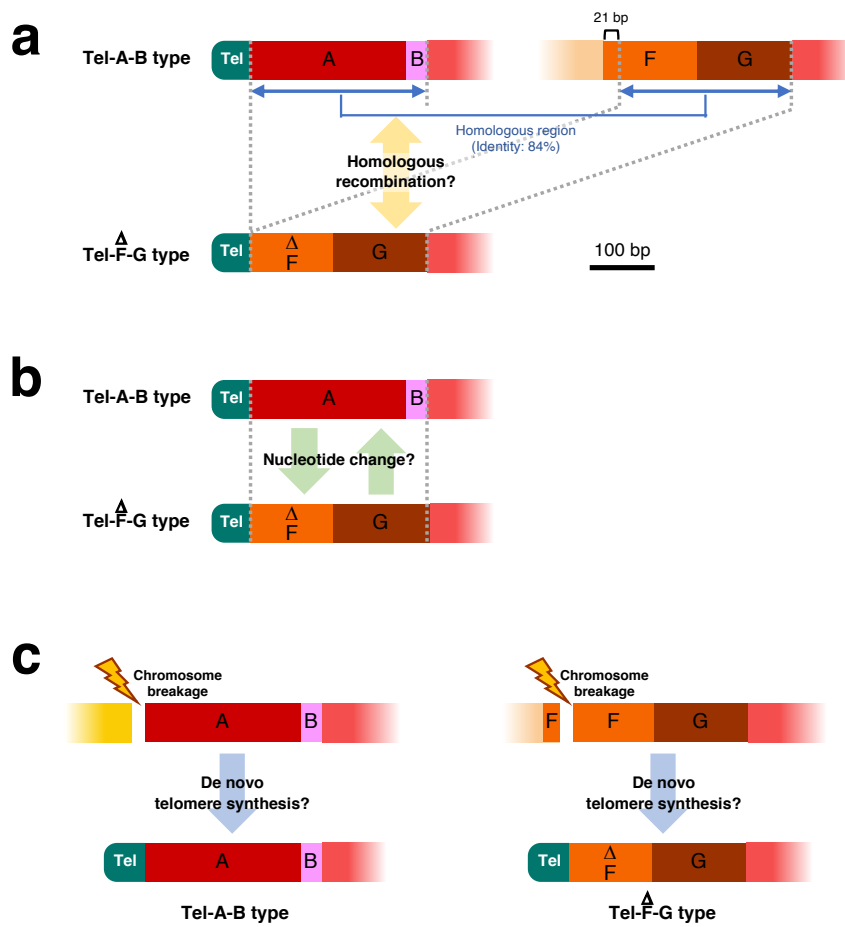

**Supplementary Fig. 6 Hypothetical models for the two types of chromosome ends.**

(a) Homologous recombination occurred between the homologous sequences, A-B and  $\Delta$ F-G, in the same or different subtelomeres, which resulted in formation of the two types of chromosome ends, Tel-A-B and Tel- $\Delta$ F-G.

(b) Mutations were introduced into either A-B or  $\Delta$ F-G sequences, which produced the two types of sequences at chromosome ends.

(c) G-rich sequences at the ends of segments A and  $\Delta$ F induced chromosome breakage and *de novo* telomere synthesis.

**a**

```

ψSH1L-L 1 ATTGATTGCTTTAATTTCAAACATGTCCCCTTTAATAGTTGGGACTTTAATAATTATCCTATTGTCAGGA 70
ψSH1L-R, ψSH1R 1 ATTGATTGCTTTAATTTCAAACATGTCCCCTTTAATAGTTGGGACTTTAATAATTATCCTATTGTCAGGA 70
ψSH2L, ψSH2R 1 ATTGATTGCTTTAATTTCAAACATGTCCCCTTTAATAGTTGGGACTTTAATAATTATCCTATTGTCAGGA 70

71 CTGCGAACTGCTTTTTATGTTACGTGGCAAGGCAGACTCATTGTGCTGGTGTAGGGCTCATACTTGAAC 140
71 CTGCGAACTGCTTTTTATGTTACGTGGCAAGGCAGACTCATTGTGCTGGTGTAGGGCTCATACTTGAAC 140
71 CTGCGAACTGCTTTTTATGTTACGTGGCAAGGCAGACTCATTGTGCTGGTGTAGGGCTCATACTTGAAC 140

141 AGGCTTATGAGGGTGGTCAGATGTTTAAACACATTGATGGCACATTGCTTTGAAACGTACAATGGTGTGA 210
141 AGGCTTATGAGGGTGGTCAGATGTTTAAACACATTGATGGCACATTGCTTTGAAACGTACAATGGTGTGA 210
141 AGGCTTATGAGGGTGGTCAGATGTTTAAACACATTGATGGCACATTGCTTTGAAACGTACAATGGTGTGA 210

211 GAAAAGTGGAAACGCAGTGTGTGGCCGATTGGCTTAAAGTAGGGCTTTTGGCTGTCACATTTGGGGCTGGA 280
211 GAAAAGTGGAAACGCAGTGTGTGGCCGATTGGCTTAAAGTAGGGCTTTTGGCTGTCACATTTGGGGCTGGA 280
211 GAAAAGTGGAAACGCAGTGTGTGGCCGATTGGCTTAAAGTAGGGCTTTTGGCTGTCACATTTGGGGCTGGA 280

281 GGACCTAGATTGGTTAACACATTAGGTGGTACTTTTCTCACTTCTCCTACTGCAAAAACGGAGCAATCTAT 350
281 GGACCTAGATTGGTTAACACATTAGGTGGT-----TCTTCGCCTACTACAAAACGG-GTAATCTAT 340
281 GGACCTAGATTGGTTAACACATTAGGTGGT-----TCTTCGCCTACTACAAAACGG-GTAATCTAT 340

351 ATTGTGATGATTTTACTGGTGTGATTACTTTAGCTGTGAACTTGAACATTAAGGCCTTACACATTGAT 420
341 ATTGTGATGATTTTACTGGTGTGATTACTTTAGCTGTGAACTTGAACATTAAGGCCTTACACATTGAT 410
341 ATTGTGATGATTTTACTGGTGTGATTACTTTAGCTGTGAACTTGAACATTAAGGCCTTACACATTGAT 410

421 GAGAAAGAGCCTGCCGTATGGTAATATACACGATGTATGGATTAACACAACCGACACTCATCAGATGATA 490
411 GAGAAAGAGCCTGCCGTATGGTAATATACACGATGTATGGATTAACACAACCGACACTCATCAGATGATA 480
411 GAGAAAGAGCCTGCCGTATGGTAATATACACGATGTATGGATTAACACAACCGACACTCATCAGATGATA 480

491 GGTGTACATATGACATTGAATGGAACAGATATGATTCATTATTATAATAAAAACCTTATGTAATTAATTATT 560 (bp)
481 GGTGTACATATGACATTGAATGGAACAGATATGATTCATTATTATAATAAAAACCTTATGTAATTAATTATT 550 (bp)
481 GGTGTACATATGACATTGAATGGAACAGATATGATTCATTATTATAATAAAAACCTTATGTAATTAATTATT 550 (bp)

```

**b**

|                       | <i>ψSH1L-R, ψSH1R</i> |              | <i>ψSH2L, ψSH2R</i> |              |
|-----------------------|-----------------------|--------------|---------------------|--------------|
|                       | Match /Total (bp)     | Identity (%) | Match /Total (bp)   | Identity (%) |
| <i>ψSH1L-L</i>        | 546/560               | 97.50        | 545/560             | 97.32        |
| <i>ψSH1L-R, ψSH1R</i> |                       |              | 549/550             | 99.82        |

C

*OSH1L-L* 1 GTTGTAAAGGATTACGAGATGCCAACATCATAATGCTTTTCCTAAATAAATGAGACACCTCAGAACGTAAA 70  
*OSH1L-R* 1 GTTGTAAAGGATTACGAGATGCCAACATCATAATGCTTTTCCTAAATAAATGAGACACCTCAGAACGTAAA 70  
*OSH1R* 1 GTTGTAAAGGATTACGAGATGCCAACATCATAATGCTTTTCCTAAATAAATGAGACACCTCAGAACGTAAA 70  
*OSH2L-L, OSH2R-L* 1 GTTGTAAAGGATTACGAGATGCCAACATCATAATGCTTTTCCTAAATAAATGAGACACCTCAGAACGTAAA 70  
*OSH2L-R, OSH2R-R* 1 GTTGTAAAGGATTACGAGATGCCAACATCATAATGCTTTTCCTAAATAAATGAGACACCTCAGAACGTAAA 70

71 ACATTCACCATTTTGG--TTTTTTTTTAATTTTCTCGTTTATGGCTTAAAAATTTTAGTATATTTTCT 138  
 71 ACATTCACCATTTTGG--TTTTTTTTTAATTTTCTCGTTTATGGCTTAAAAATTTTAGTATATTTTCT 138  
 71 ACATTCACCATTTTGG--TTTTTTTTTAATTTTCTCGTTTATGGCTTAAAAATTTTAGTATATTTTCT 138  
 71 AATTCACCATTTTGG--TTTTTTTTTAATTTTCTCGTTTATGGCTTAAAAATTTTAGTATATTTTCT 138  
 71 ACATTCACCATTTTGGTTTTTTTTTTAATTTTCTCGTTTATGGCTTAAAAATTTTAGTATATTTTCT 140

139 TTTTATTTTCCATAAACCACTCTTTTAAATTTTACTTTGGGGAAAAATAC TAGTGAATCAGAAGTCATC 208  
 139 TTTTATTTTCCATAAACCACTCTTTTAAATTTTACTTTGGGGAAAAATAC TAGTGAATCAGAAGTCATC 208  
 139 TTTTATTTTCCATAAACCACTCTTTTAAATTTTACTTTGGGGAAAAATAC TAGTGAATCAGAAGTCATC 208  
 139 TTTTATTTTCCATAAACCACTCTTTTAAATTTTACTTTGGGGAAAAATAC TAGTGAATCAGAAGTCATC 208  
 141 TTTTATTTTCCATAAACCACTCTTTTAAATTTTACTTTGGGGAAAAATAC TAGTGAATCAGAAGTCATC 210

209 AAATTACAGTGTCTGCTTCATTCCAATGTCAAATCCAGAAAGCTTGAAAAACAGGTTGAACCTCCTG 278  
 209 AAATTACAGTGTCTGCTTCATTCCAATGTCAAATCCAGAAAGCTTGAAAAACAGGTTGAACCTCCTG 278  
 209 AAATTACAGTGTCTGCTTCATTCCAATGTCAAATCCAGAAAGCTTGAAAAACAGGTTGAACCTCCTG 278  
 209 AAATTACAGTGTCTGCTTCATTCCAATGTCAAATCCAGAAAGCTTGAAAAACAGGTTGAACCTCCTG 278  
 211 AAATTACAGTGTCTGCTTCATTCCAATGTCAAATCCAGAAAGCTTGAAAAACAGGTTGAACCTCCTG 280

279 GTTACAATGAGTTATTTATGGTGAAGATGTTTGAATGTGGACCTAGAGCAGGGACTTGATTTGTGTAA 348  
 279 GTTACAATGAGTTATTTATGGTGAAGATGTTTGAATGTGGACCTAGAGCAGGGACTTGATTTGTGTAA 348  
 279 GTTACAATGAGTTATTTATGGTGAAGATGTTTGAATGTGGACCTAGAGCAGGGACTTGATTTGTGTAA 348  
 279 GTTACAATGAGTTATTTATGGTGAAGATGTTTGAATGTGGACCTAGAGCAGGGACTTGATTTGTGTAA 348  
 281 GTTACAATGAGTTATTTATGGTGAAGATGTTTGAATGTGGACCTAGAGCAGGGACTTGATTTGTGTAA 350

349 GCCTGAAAAGGTAAACAAACAATCTCAACGATCTCGACAATCCCGACAATCCCTCTTTACCAACACCATT 418  
 349 GCCTGAAAAGGTAAACAAACAATCTCAACGATCTCGACAATCCCGACAATCCCTCTTTACCAACACCATT 418  
 349 GCCTGAAAAGGTAAACAAACAATCTCAACGATCTCGACAATCCCGACAATCCCTCTTTACCAACACCATT 418  
 349 GCCTGAAAAGGTAAACAAACAATCTCAACGATCTCGACAATCCCGACAATCCCTCTTTACCAACACCATT 418  
 351 GCCTGAAAAGGTAAACAAACAATCTCAACGATCTCGACAATCCCGACAATCCCTCTTTACCAACACCATT 420

419 AAGCCTCAAAAAGACAAGATGAATATTTAAACAATAAAATAAAAGAGTTTTTAAATGACCTTTTTACTG 488  
 419 AAGCCTCAAAAAGACAAGATGAATATTTAAACAATAAAATAAAAGAGTTTTTAAATGACCTTTTTACTG 488  
 419 AAGCCTCAAAAAGACAAGATGAATATTTAAACAATAAAATAAAAGAGTTTTTAAATGACCTTTTTACTG 488  
 419 AAGCCTCAAAAAGACAAGATGAATATTTAAACAATAAAATAAAAGAGTTTTTAAATGACCTTTTTACTG 488  
 421 AAGCCTCAAAAAGACAAGATGAATATTTAAACAATAAAATAAAAGAGTTTTTAAATGACCTTTTTACTG 490

489 AATTTTCTAAATTCACAATAGCTATTATCCTGATGGAAGGATTTCTACTCAGGACAATCTCGATGGGT 558  
 489 AATTTTCTAAATTCACAATAGCTATTATCCTGATGGAAGGATTTCTACTCAGGACAATCTCGATGGGT 558  
 489 AATTTTCTAAATTCACAATAGCTATTATCCTGATGGAAGGATTTCTACTCAGGACAATCTCGATGGGT 558  
 489 AATTTTCTAAATTCACAATAGCTATTATCCTGATGGAAGGATTTCTACTCAGGACAATCTCGATGGGT 558  
 491 AATTTTCTAAATTCACAATAGCTATTATCCTGATGGAAGGATTTCTACTCAGGACAATCTCGATGGGT 560

559 CTTGCTTATTATTTGGTCTATTATCACTATTTTAAACAATAGACAAGAAATTTAAAAATAAAAGAGTCATAT 628  
 559 CTTGCTTATTATTTGGTCTATTATCACTATTTTAAACAATAGACAAGAAATTTAAAAATAAAAGAGTCATAT 628  
 559 CTTGCTTATTATTTGGTCTATTATCACTATTTTAAACAATAGACAAGAAATTTAAAAATAAAAGAGTCATAT 628  
 559 CTTGCTTATTATTTGGTCTATTATCACTATTTTAAACAATAGACAAGAAATTTAAAAATAAAAGAGTCATAT 628  
 561 CTTGCTTATTATTTGGTCTATTATCACTATTTTAAACAATAGACAAGAAATTTAAAAATAAAAGAGTCATAT 630

629 TTAGAATGGATAGGTGAAAAFCAGTCCCACAGTGAATTTGGGGCCTATTGTTATTTATGTTGGCTTAT 698  
 629 TCAATTTGGATAAATGAAAAFCGGTCTACAGTGAATTTGGGTGCCATTGCTATTTACGTTTGTGTTGC 698  
 629 TCAATTTGGATAAATGAAAAFCGGTCTACAGTGAATTTGGGTGCCATTGCTATTTACGTTTGTGTTGC 698  
 629 TCAATTTGGATAAATGAAAAFCGGTCTACAGTGAATTTGGGTGCCATTGCTATTTACGTTTGTGTTGC 698  
 631 TCAATTTGGATAAATGAAAAFCGGTCTACAGTGAATTTGGGTGCCATTGCTATTTACGTTTGTGTTGC 700

699 TCATACCTTATTGCTGCTTTTAACTGTACGTTTCCTTCCACTGAAGCTGTTTTT--TCTCTTACT 765  
 699 TTGTTTTAATGTTACTTAGTTTTAATTTGATGTTTCCTTTATAGTGAAGCTTTTTTCTTTTTTTTGGCT 768  
 699 TTGTTTTAATGTTACTTAGTTTTAATTTGATGTTTCCTTTATAGTGAAGCTTTTTTCTTTTTTTTGGCT 768  
 699 TTGTTTTAATGTTACTTAGTTTTAATTTGATGTTTCCTTTATAGTGAAGCTTTTTTCTTTTTTTTGGCT 768  
 701 TTGTTTTAATGTTACTTAGTTTTAATTTGATGTTTCCTTTATAGTGAAGCTTTTTTCTTTTTTTTGGCT 770

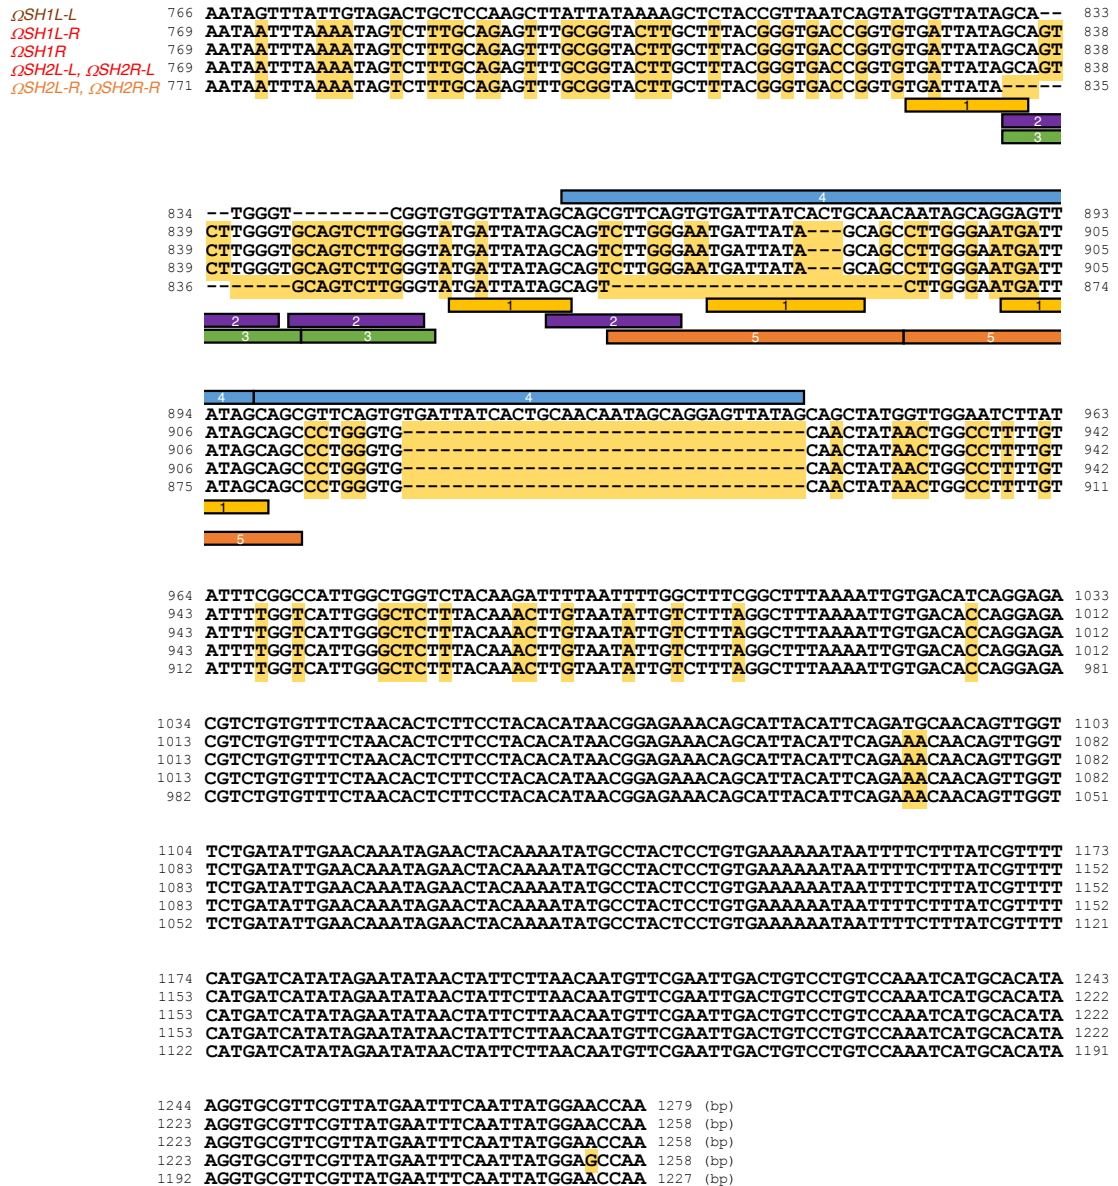

**d**

|                         | <i>ΩSH1L-R</i>    |              | <i>ΩSH1R</i>      |              | <i>ΩSH2L-L, ΩSH2R-L</i> |              | <i>ΩSH2L-R, ΩSH2R-R</i> |              |
|-------------------------|-------------------|--------------|-------------------|--------------|-------------------------|--------------|-------------------------|--------------|
|                         | Match /Total (bp) | Identity (%) | Match /Total (bp) | Identity (%) | Match /Total (bp)       | Identity (%) | Match /Total (bp)       | Identity (%) |
| <i>ΩSH1L-L</i>          | 1099/1294         | 84.93        | 1097/1294         | 84.78        | 1098/1294               | 84.85        | 1077/1292               | 83.36        |
| <i>ΩSH1L-R</i>          |                   |              | 1256/1258         | 99.84        | 1255/1258               | 99.76        | 1225/1260               | 97.22        |
| <i>ΩSH1R</i>            |                   |              |                   |              | 1253/1258               | 99.60        | 1223/1260               | 97.06        |
| <i>ΩSH2L-L, ΩSH2R-L</i> |                   |              |                   |              |                         |              | 1222/1260               | 96.98        |

Supplementary Fig. 7 Homologous sequences at the ends of changes in *SH-D* regions.

(a) Homologous  $\Psi$  sequences located at the ends of the 3.7 kb-change (purple and pink boxes in Fig. 5a–b).  $\Psi SHIL-L$  (purple) and  $\Psi SHIL-R$  (pink) are  $\Psi$  sequences on the left side and the right side of the 3.7 kb-insertion in  $SHIL$  in Fig. 5a–b, respectively;  $\Psi SH1R$ ,  $\Psi SH2L$ , and  $\Psi SH2R$  (pink) are  $\Psi$  sequences in  $SH1R$ ,  $SH2L$ , and  $SH2R$ , respectively. Differences in sequences between  $\Psi SHIL-L$  and the others are highlighted in yellow. Note that sequences of the pairs,  $\Psi SHIL-R$  and  $\Psi SH1R$ , and  $\Psi SH2L$  and  $\Psi SH2R$  are 100% identical.

(b) Sequence identities between  $\Psi$  sequences in (a).

(c) Homologous  $\Omega$  sequences at the ends of the 7.1 kb-change (brown, red, and orange boxes in Fig. 5a–b).  $\Omega SHIL-L$  (brown) and  $\Omega SHIL-R$  (red) are sequences on the left side and the right side of the 7.1 kb-insertion, respectively, in  $SHIL$  in Fig. 5a–b;  $\Omega SH1R$  (red), that in  $SH1R$ ;  $\Omega SH2L-L$  (red) and  $\Omega SH2L-R$  (orange) are on the left side and the right side of the insertion in  $SH2L$ , respectively;  $\Omega SH2R-L$  (red) and  $\Omega SH2R-R$  (orange) are on the left side and the right side of the insertion in  $SH2R$ , respectively. Note that the region containing multiple repeat units (boxes 1–5) shows high sequence variation. Differences in sequences between  $\Omega SHIL-L$  and the others are highlighted in yellow. Note that sequences of the pairs,  $\Omega SH2L-L$  and  $\Omega SH2R-L$ , and  $\Omega SH2L-R$  and  $\Omega SH2R-R$  are 100% identical.

(d) Sequence identities between  $\Omega$  sequences in (c).

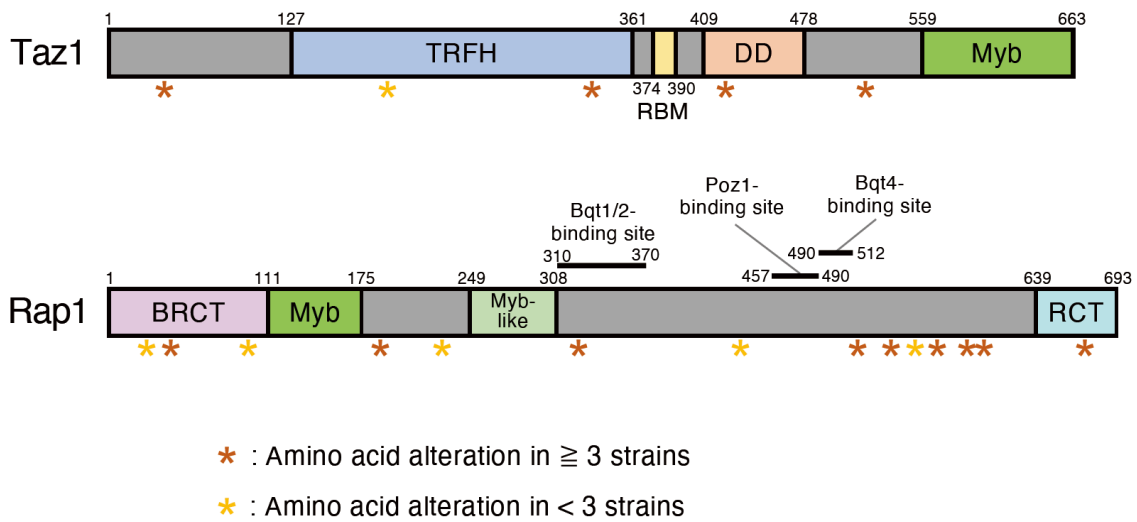

**Supplementary Fig. 8 Variation of amino acid sequences of Taz1 and Rap1 in JB strains.**

Amino acid alterations of Taz1 and Rap1 in JB strains compared with those in PomBase-972. Orange asterisk, amino acid alteration found in no less than three JB strains; yellow asterisk, that in less than three JB strains. TRFH, TRF-homology domain, RBM, Rap1-binding motif; DD, dimerization domain; Myb, Myb domain<sup>3,4</sup>. BRCT, BRCA1 C-terminal domain; Myb, Myb domain; Myb-like, Myb-like domain; RCT, Rap1 C-terminal domain; black bars, regions for interactions with Bqt1/2, Poz1 or Bqt4 proteins<sup>3,5-8</sup>.



4525719 PomBase-*tlh2* 4525788  
*tlh1* (972SD4[1L+]) TATTCGTGATGAGAATCAACGTTGCAATTTTGTGTTGTAGAAAATTGCCCTTCGAAAATTCGAAAATTTGG  
*tlh3* (972SD4[1R+]) TATTCGTGATGAGAATCAACGTTGCAATTTTGTGTTGTAGAAAATTGCCCTTCGAAAATTCGAAAATTTGG  
*tlh4* (972SD4[2L+]) TATTCGTGATGAGAATCAACGTTGCAATTTTGTGTTGTAGAAAATTGCCCTTCGAAAATTCGAAAATTTGG  
*tlh2* (972SD4[2R+]) TATTCGTGATGAGAATCAACGTTGCAATTTTGTGTTGTAGAAAATTGCCCTTCGAAAATTCGAAAATTTGG

4525789 4525858  
ATTTGATGCATTTTTTTTGTGATTTCACGTCGATCATTATTTACTTATTTCTATTTTTGTTTTGATT  
ATTTGATGCATTTTTTTTGTGATTTCACGTCGATCATTATTTACTTATTTCTATTTTTGTTTTGATT  
ATTTGATGCATTTTTTTTGTGATTTCACGTCGATCATTATTTACTTATTTCTATTTTTGTTTTGATT  
ATTTGATGCATTTTTTTTGTGATTTCACGTTGATCATTATTTACTTATTTCTATTTTTGTTTTGATT  
ATTTGATGCATTTTTTTTGTGATTTCACGTCGATCATTATTTACTTATTTCTATTTTTGTTTTGATT

4525859 4525928  
TTGTTTTTTTACTTGTGTTTACGAAAAAAGAGCCTATTGCTGCTGCACAAAGCTTTTTGTTTGATT  
TTGTTTTTTTACTTGTGTTTACGAAAAAAGAGCCTATTGCTGCTGCACAAAGCTTTTTGTTTGATT  
TTGTTTTTTTACTTGTGTTTACGAAAAAAGAGCCTATTGCTGCTGCACAAAGCTTTTTGTTTGATT  
TTGTTTTTTTACTTGTGTTTACGAAAAAAGAGCCTATTGCTGCTGCACAAAGCTTTTTGTTTGATT  
TTGTTTTTTTACTTGTGTTTACGAAAAAAGAGCCTATTGCTGCTGCACAAAGCTTTTTGTTTGATT

4525929 4525988  
TTTCATCCTACTTCTGTATTGGCAGTTTTCTCATTACAAAGACTAGCAACAGCCAGTCATTCATTTTCT  
TTTCATCCTACTTCTGTATTGGCAGTTTTCTCATTACAAAGACTAGCAACAGCCAGTCATTCATTTTCT  
TTTCATCCTACTTCTGTATTGGCAGTTTTCTCATTACAAAGACTAGCAACAGCCAGTCATTCATTTTCT  
TTTCATCCTACTTCTGTATTGGCAGTTTTCTCATTACAAAGACTAGCAACAGCCAGTCATTCATTTTCT  
TTTCATCCTACTTCTGTATTGGCAGTTTTCTCATTACAAAGACTAGCAACAGCCAGTCATTCATTTTCT

4525999 4526068  
ACACGCTCTATTATTTCTTTTTTCATCACAATAAACTAACATGTCCGATTAGACTCTCAGATCCATTGCT  
ACACGCTCTATTATTTCTTTTTTCATCACAATAAACTAACATGTCCGATTAGACTCTCAGATCCATTGCT  
ACACGCTCTATTATTTCTTTTTTCATCACAATAAACTAACATGTCCGATTAGACTCTCAGATCCATTGCT  
ACACGCTCTATTATTTCTTTTTTCATCACAATAAACTAACATGTCCGATTAGACTCTCAGATCCATTGCT  
ACACGCTCTATTATTTCTTTTTTCATCACAATAAACTAACATGTCCGATTAGACTCTCAGATCCATTGCT

4526069 4526138  
AGCAATTAATTGCACTCTCCATTTCCGCTTTTTCTTTTTGATATTTTTTCTCTTTATATTATATTAT  
AGCAATTAATTGCACTCTCCATTTCCGCTTTTTCTTTTTGATATTTTTTCTCTTTATATTATATTAT  
AGCAATTAATTGCACTCTCCATTTCCGCTTTTTCTTTTTGATATTTTTTCTCTTTATATTATATTAT  
AGCAATTAATTGCACTCTCCATTTCCGCTTTTTCTTTTTGATATTTTTTCTCTTTATATTATATTAT  
AGCAATTAATTGCACTCTCCATTTCCGCTTTTTCTTTTTGATATTTTTTCTCTTTATATTATATTAT

4526139 4526206  
ATTATATTCATTCTTCATTTTCTCTCTTGCCATTATTTTTTTTTTTTTTTT--AATACCTCTGTGCTC  
ATTATATTCATTCTTCATTTTCTCTCTTGCCATTATTTTTTTTTTTTTTTT--AATACCTCTGTGCTC  
ATTATATTCATTCTTCATTTTCTCTCTTGCCATTATTTTTTTTTTTTTTTT--AATACCTCTGTGCTC  
ATTATATTCATTCTTCATTTTCTCTCTTGCCATTATTTTTTTTTTTTTTTT--AATACCTCTGTGCTC  
ATTATATTCATTCTTCATTTTCTCTCTTGCCATTATTTTTTTTTTTTTTTT--AATACCTCTGTGCTC

4526207 4526275  
TCGATTCAACATGGGTGAACTCAA-GAAATCTTGAAACAGAGGTATCATGAGTTGATTGATTGGAATGTT  
TCGATTCAACATGGGTGAACTCAA-GAAATCTTGAAACAGAGGTATCATGAGTTGATTGATTGGAATGTT  
TCGATTCAACATGGGTGAACTCAA-GAAATCTTGAAACAGAGGTATCATGAGTTGATTGATTGGAATGTT  
TCGATTCAACATGGGTGAACTCAA-GAAATCTTGAAACAGAGGTATCATGAGTTGATTGATTGGAATGTT  
TCGATTCAACATGGGTGAACTCAA-GAAATCTTGAAACAGAGGTATCATGAGTTGATTGATTGGAATGTT

4526276 4526345  
AAAGCTCCTCATGTTCCCTTAGTAAACGATTAAGCATTTTACATGGTCTTGTTTTCGCTGTACTATGG  
AAAGCTCCTCATGTTCCCTTAGTAAACGATTAAGCATTTTACATGGTCTTGTTTTCGCTGTACTATGG  
AAAGCTCCTCATGTTCCCTTAGTAAACGATTAAGCATTTTACATGGTCTTGTTTTCGCTGTACTATGG  
AAAGCTCCTCATGTTCCCTTAGTAAACGATTAAGCATTTTACATGGTCTTGTTTTCGCTGTACTATGG  
AAAGCTCCTCATGTTCCCTTAGTAAACGATTAAGCATTTTACATGGTCTTGTTTTCGCTGTACTATGG

4526346 4526415  
CAACTGGTGGTGTGGCTTGATCATTGGTCTTTTCCCTTTCGTTTCTATGGTCTTAATACAATTGGCAA  
CAACTGGTGGTGTGGCTTGATCATTGGTCTTTTCCCTTTCGTTTCTATGGTCTTAATACAATTGGCAA  
CAACTGGTGGTGTGGCTTGATCATTGGTCTTTTCCCTTTCGTTTCTATGGTCTTAATACAATTGGCAA  
CAACTGGTGGTGTGGCTTGATCATTGGTCTTTTCCCTTTCGTTTCTATGGTCTTAATACAATTGGCAA  
CAACTGGTGGTGTGGCTTGATCATTGGTCTTTTCCCTTTCGTTTCTATGGTCTTAATACAATTGGCAA

4526416 4526485  
AATTGTTTACATTCTTCAAATCGTTTTATTAACCTCTCTTTGGATCGTGTATGCTTTTTCGTTTTATTTAAA  
AATTGTTTACATTCTTCAAATCGTTTTATTAACCTCTCTTTGGATCGTGTATGCTTTTTCGTTTTATTTAAA  
AATTGTTTACATTCTTCAAATCGTTTTATTAACCTCTCTTTGGATCGTGTATGCTTTTTCGTTTTATTTAAA  
AATTGTTTACATTCTTCAAATCGTTTTATTAACCTCTCTTTGGATCGTGTATGCTTTTTCGTTTTATTTAAA

4526486 4526555  
TATCCTTCAACTATTAAAGATTCATGGAACCATCATTGGAAAAGCTTTTCATTGCTACTTGTCTTCTTTT  
TATCCTTCAACTATTAAAGATTCATGGAACCATCATTGGAAAAGCTTTTCATTGCTACTTGTCTTCTTTT  
TATCCTTCAACTATTAAAGATTCATGGAACCATCATTGGAAAAGCTTTTCATTGCTACTTGTCTTCTTTT  
TATCCTTCAACTATTAAAGATTCATGGAACCATCATTGGAAAAGCTTTTCATTGCTACTTGTCTTCTTTT

4526556 4526625  
CGTTATCCACTTTCATCGACATGCTTGCCATATACGCCTATGCTGATACGGGCGAGTGGATGGTATGGGT  
CGTTATCCACTTTCATCGACATGCTTGCCATATACGCCTATGCTGATACGGGCGAGTGGATGGTATGGGT  
CGTTATCCACTTTCATCGACATGCTTGCCATATACGCCTATGCTGATACGGGCGAGTGGATGGTATGGGT  
CGTTATCCACTTTCATCGACATGCTTGCCATATACGCCTATGCTGATACGGGCGAGTGGATGGTATGGGT

4526626 4526695  
GATTCGAATTCCTTATTACATTTTTGTTGCGTAGCTTTTATATACTGTGTAAGTGCTTTTTTTCACAATT  
GATTCGAATTCCTTATTACATTTTTGTTGCGTAGCTTTTATATACTGTGTAAGTGCTTTTTTTCACAATT  
GATTCGAATTCCTTATTACATTTTTGTTGCGTAGCTTTTATATACTGTGTAAGTGCTTTTTTTCACAATT  
GATTCGAATTCCTTATTACATTTTTGTTGCGTAGCTTTTATATACTGTGTAAGTGCTTTTTTTCACAATT

4526696 452765  
TTCAACAATCATGTATATACCATTGAAACCGCATCTCCTGCTTGGATTCTTCCATTTTTTCTCTCATGA  
TTCAACAATCATGTATATACCATTGAAACCGCATCTCCTGCTTGGATTCTTCCATTTTTTCTCTCATGA  
TTCAACAATCATGTATATACCATTGAAACCGCATCTCCTGCTTGGATTCTTCCATTTTTTCTCTCATGA  
TTCAACAATCATGTATATACCATTGAAACCGCATCTCCTGCTTGGATTCTTCCATTTTTTCTCTCATGA

4526766 4526835  
TTTGTGGTGTATTGCTGGCGCTGTCAATGCTACACAACCTGCTCGTCAATTAATAAATATGGTTATCTT  
TTTGTGGTGTATTGCTGGCGCTGTCAATGCTACACAACCTGCTCGTCAATTAATAAATATGGTTATCTT  
TTTGTGGTGTATTGCTGGCGCTGTCAATGCTACACAACCTGCTCGTCAATTAATAAATATGGTTATCTT  
TTTGTGGTGTATTGCTGGCGCTGTCAATGCTACACAACCTGCTCGTCAATTAATAAATATGGTTATCTT

4526836 4526905  
TGGTATCCTTTTTTTTTTTTTTTTTTTTTTTTTTTTTTTTTCACATTTCTACTGCCATGGTCGTCGCTTCAGAAATT  
TGGTATCCTTTTTTTTTTTTTTTTTTTTTTTTTTTT---CACATTTCTACTGCCATGGTCGTCGCTTCAGAAATT  
TGGTATCCTTTTTTTTTTTTTTTTTTTTTTTTTTTT---CACATTTCTACTGCCATGGTCGTCGCTTCAGAAATT  
TGGTATCCTTTTTTTTTTTTTTTTTTTTTTTTTTTT---CACATTTCTACTGCCATGGTCGTCGCTTCAGAAATT

4526906 4526975  
GCTAAAGTCGCTTCAAAAACCTGCTAGAGATATCGCCGGATGCTTTACTTGTCAATGTGGAACCTCAATTTG  
GCTAAAGTCGCTTCAAAAACCTGCTAGAGATATCGCCGGATGCTTTACTTGTCAATGTGGAACCTCAATTTG  
GCTAAAGTCGCTTCAAAAACCTGCTAGAGATATCGCCGGATGCTTTACTTGTCAATGTGGAACCTCAATTTG  
GCTAAAGTCGCTTCAAAAACCTGCTAGAGATATCGCCGGATGCTTTACTTGTCAATGTGGAACCTCAATTTG

4526976 4527045  
ATAATGTAGAAAGGATCGTTCAACATTTCAAGGAATGTCGATACAGAGACGAACTTGTAAAGACGATGA  
ATAATGTAGAAAGGATCGTTCAACATTTCAAGGAATGTCGATACAGAGACGAACTTGTAAAGACGATGA  
ATAATGTAGAAAGGATCGTTCAACATTTCAAGGAATGTCGATACAGAGACGAACTTGTAAAGACGATGA  
ATAATGTAGAAAGGATCGTTCAACATTTCAAGGAATGTCGATACAGAGACGAACTTGTAAAGACGATGA

4527046 4527115  
TATCGTCGTCTATGAACCCAGCTCTTTTCGTTTCAGGACGAGAAAAGGATAAGCCAATCATCGTTGAGGCT  
TATCGTCGTCTATGAACCCAGCTCTTTTCGTTTCAGGACGAGAAAAGGATAAGCCAATCATCGTTGAGGCT  
TATCGTCGTCTATGAACCCAGCTCTTTTCGTTTCAGGACGAGAAAAGGATAAGCCAATCATCGTTGAGGCT  
TATCGTCGTCTATGAACCCAGCTCTTTTCGTTTCAGGACGAGAAAAGGATAAGCCAATCATCGTTGAGGCT

4527116 4527185  
GCCAGTGAGGCTACCAGTGAGGAGGCTTGAATTCTTCCAAGGAGCGTCAACTACCCGCTCTCTCTGCTC  
GCCAGTGAGGCTACCAGTGAGGAGGCTTGAATTCTTCCAAGGAGCGTCAACTACCCGCTCTCTCTGCTC  
GCCAGTGAGGCTACCAGTGAGGAGGCTTGAATTCTTCCAAGGAGCGTCAACTACCCGCTCTCTCTGCTC  
GCCAGTGAGGCTACCAGTGAGGAGGCTTGAATTCTTCCAAGGAGCGTCAACTACCCGCTCTCTCTGCTC

4527186 4527255  
TTCTGCTCTCTACTCTCACTACGAGTGCAAATGACGACTTGTGGACTGCACGGCTAATTTGGCAAAG  
TCTCTGCTCTCTACTCTCACTACGAGTGCAAATGACGACTTGTGGACTGCACGGCTAATTTGGCAAAG  
TTCTGCTCTCTACTCTCACTACGAGTGCAAATGACGACTTGTGGACTGCACGGCTAATTTGGCAAAG  
TCTCTGCTCTCTACTCTCACTACGAGTGCAAATGACGACTTGTGGACTGCACGGCTAATTTGGCAAAG  
TCTCTGCTCTCTACTCTCACTACGAGTGCAAATGACGACTTGTGGACTGCACGGCTAATTTGGCAAAG

4527256 4527325  
TACAAATGACACCAAATTTGGACAACAGCCCATCATCAAATTATACTGACTTGAATCACAAGTTGGCTAAT  
TACAAATGACACCAAATTTGGACAACAGCCCATCATCAAATTATACTGACTTGAATCACAAGTTGGCTAAT  
TACAAATGACACCAAATTTGGACAACAGCCCATCATCAAATTATACTGACTTGAATCACAAGTTGGCTAAT  
TACAAATGACACCAAATTTGGACAACAGCCCATCATCAAATTATACTGACTTGAATCACAAGTTGGCTAAT

4527326 4527395  
TATGGACTCTCCATTTTGTCTATTATCATGCTTTGATGTGCGTAGAATGTGAATGCTTGTAAACGTGATTC  
TATGGACTCTCCATTTTGTCTATTATCATGCTTTGATGTGCGTAGAATGTGAATGCTTGTAAACGTGATTC  
TATGGACTCTCCATTTTGTCTATTATCATGCTTTGATGTGCGTAGAATGTGAATGCTTGTAAACGTGATTC  
TATGGACTCTCCATTTTGTCTATTATCATGCTTTGATGTGCGTAGAATGTGAATGCTTGTAAACGTGATTC

4527396 4527465  
ACACTGCGCAACATATGCAAATTTGTCATAAAC TAGAGTTAAACGAAGATCTTTTGTGGTTTCAAGAACT  
ACACTGCGCAACATATGCAAATTTGTCATAAAC TAGAGTTAAACGAAGATCTTTTGTGGTTTCAAGAACT  
ACACTGCGCAACATATGCAAATTTGTCATAAAC TAGAGTTAAACGAAGATCTTTTGTGGTTTCAAGAACT  
ACACTGCGCAACATATGCAAATTTGTCATAAAC TAGAGTTAAACGAAGATCTTTTGTGGTTTCAAGAACT

4527466 4527535  
AAGGACTTTAAAGTTAAAAAGTCCAACAAATGTTTTACAACTCATTCTTCTCAAACCCATGTATACCCA  
AAGGACTTTAAAGTTAAAAAGTCCAACAAATGTTTTACAACTCATTCTTCTCAAACCCATGTATACCCA  
AAGGACTTTAAAGTTAAAAAGTCCAACAAATGTTTTACAACTCATTCTTCTCAAACCCATGTATACCCA  
AAGGACTTTAAAGTTAAAAAGTCCAACAAATGTTTTACAACTCATTCTTCTCAAACCCATGTATACCCA

4527536 4527605  
TACATCAGAGGACTACCAGTACTTTTAAATGGATATGAGTGTGTGCCGTGCACAAAAACGGAACAGGAT  
TACATCAGAGGACTACCAGTACTTTTAAATGGATATGAGTGTGTGCCGTGCACAAAAACGGAACAGGAT  
TACATCAGAGGACTACCAGTACTTTTAAATGGATATGAGTGTGTGCCGTGCACAAAAACGGAACAGGAT  
TACATCAGAGGACTACCAGTACTTTTAAATGGATATGAGTGTGTGCCGTGCACAAAAACGGAACAGGAT

4527606 4527675  
TCGTACATGCAATCATGGATACCTTTTCGCCATCATGTTTCGACGTACTCATGGAAAAGTTATAAAAATGGGA  
TCGTACATGCAATCATGGATACCTTTTCGCCATCATGTTTCGACGTACTCATGGAAAAGTTATAAAAATGGGA  
TCGTACATGCAATCATGGATACCTTTTCGCCATCATGTTTCGACGTACTCATGGAAAAGTTATAAAAATGGGA  
TCGTACATGCAATCATGGATACCTTTTCGCCATCATGTTTCGACGTACTCATGGAAAAGTTATAAAAATGGGA

4527676 4527745  
AAATTGTATACGTCGAACAGCTTTTGCAAACGGTTAAGAACAAGTATGCTCAACGATGTCAGTTCCTTCAAAA  
AAATTGTATACGTCGAACAGCTTTTGCAAACGGTTAAGAACAAGTATGCTCAACGATGTCAGTTCCTTCAAAA  
AAATTGTATACGTCGAACAGCTTTTGCAAACGGTTAAGAACAAGTATGCTCAACGATGTCAGTTCCTTCAAAA  
AAATTGTATACGTCGAACAGCTTTTGCAAACGGTTAAGAACAAGTATGCTCAACGATGTCAGTTCCTTCAAAA

4527746 4527815  
GTCGATTATGTACCTTTGAATGGAGGAGAAGAAGAAGAGAGGAGGAGGGGGAGGAGAAAGAAGATGCAC  
GTCGATTATGTACCTTTGAATGGAGGAGAAGAAGAAGAGAGGAGGAGGGGGAGGAGAAAGAAGATGCAC  
GTCGATTATGTACCTTTGAATGGAGGAGAAGAAGAAGAGAGGAGGAGGGGGAGGAGAAAGAAGATGCAC  
GTCGATTATGTACCTTTGAATGGAGGAGAAGAAGAAGAGAGGAGGAGGGGGAGGAGAAAGAAGATGCAC

4527816 4527885  
AAAACATCAAGGAAAGAATGGTGGACTTTTGCCTTTTCAAATTTATGGAGAAGAATCAACAGCGCGGGG  
AAAACATCAAGGAAAGAATGGTGGACTTTTGCCTTTTCAAATTTATGGAGAAGAATCAACAGCGCGGGG  
AAAACATCAAGGAAAGAATGGTGGACTTTTGCCTTTTCAAATTTATGGAGAAGAATCAACAGCGCGGGG  
AAAACATCAAGGAAAGAATGGTGGACTTTTGCCTTTTCAAATTTATGGAGAAGAATCAACAGCGCGGGG

4527886 4527955  
GCAGCAAGACAAAGGTGAAAAATAAAAAACGACAAGATGATGTTGACCAAGCAACAGACAACAACACTAAC  
GCAGCAAGACAAAGGTGAAAAATAAAAAACGACAAGATGATGTTGACCAAGCAACAGACAACAACACTAAC  
GCAGCAAGACAAAGGTGAAAAATAAAAAACGACAAGATGATGTTGACCAAGCAACAGACAACAACACTAAC  
GCAGCAAGACAAAGGTGAAAAATAAAAAACGACAAGATGATGTTGACCAAGCAACAGACAACAACACTAAC

4527956 4528025  
ACTATTCTTGAAGATGATGAAAAAGATAACGATGAAGAGGAAGAGGAGAGATTGTCAATGCACGAGAGA  
ACTATTCTTGAAGATGATGAAAAAGATAACGATGAAGAGGAAGAGGAGAGATTGTCAATGCACGAGAGA  
ACTATTCTTGAAGATGATGAAAAAGATAACGATGAAGAGGAAGAGGAGAGATTGTCAATGCACGAGAGA  
ACTATTCTTGAAGATGATGAAAAAGATAACGATGAAGAGGAAGAGGAGAGATTGTCAATGCACGAGAGA

4528026 4528095  
AAAATCTTTTAAATCAACAATTC AATGGACGGCAATTGTGAAAAAATTTGGAGAAAATTTGGGATCAGCT  
AAAATCTTTTAAATCAACAATTC AATGGACGGCAATTGTGAAAAAATTTGGAGAAAATTTGGGATCAGCT  
AAAATCTTTTAAATCAACAATTC AATGGACGGCAATTGTGAAAAAATTTGGAGAAAATTTGGGATCAGCT  
AAAATCTTTTAAATCAACAATTC AATGGACGGCAATTGTGAAAAAATTTGGAGAAAATTTGGGATCAGCT

4528096 4528165  
GGTTCGATTTCGAATATACGAATGGAATGTAACTTTGGATACCATTGTAAACCAGTTGATTCGTTATTAC  
GGTTCGATTTCGAATATACGAATGGAATGTAACTTTGGATACCATTGTAAACCAGTTGATTCGTTATTAC  
GGTTCGATTTCGAATATACGAATGGAATGTAACTTTGGATACCATTGTAAACCAGTTGATTCGTTATTAC  
GGTTCGATTTCGAATATACGAATGGAATGTAACTTTGGATACCATTGTAAACCAGTTGATTCGTTATTAC

4528166 452835  
TATCGAGGATTCGGTCATCTAAGTGAATGACCATGGGCATGAGACGAATGTTTACTCAAGGAGGAAGCT  
TATCGAGGATTCGGTCATCTAAGTGAATGACCATGGGCATGAGACGAATGTTTACTCAAGGAGGAAGCT  
TATCGAGGATTCGGTCATCTAAGTGAATGACCATGGGCATGAGACGAATGTTTACTCAAGGAGGAAGCT  
TATCGAGGATTCGGTCATCTAAGTGAATGACCATGGGCATGAGACGAATGTTTACTCAAGGAGGAAGCT

4528236 4528305  
ATAGTGCACAAGAGCGAGGACTTTGTGCTTAGAGCAAAAGGATACAGTTGTGAGATATGCTCAAAGTGC  
ATAGTGCACAAGAGCGAGGACTTTGTGCTTAGAGCAAAAGGATACAGTTGTGAGATATGCTCAAAGTGC  
ATAGTGCACAAGAGCGAGGACTTTGTGCTTAGAGCAAAAGGATACAGTTGTGAGATATGCTCAAAGTGC  
ATAGTGCACAAGAGCGAGGACTTTGTGCTTAGAGCAAAAGGATACAGTTGTGAGATATGCTCAAAGTGC

4528306 4528375  
AGCACTATACCTAATAATTTCTGTTACGTCGTCATCAGCGGACTCGGGGATAAGAAGACACTTTGGAAGCA  
AGCACTATACCTAATAATTTCTGTTACGTCGTCATCAGCGGACTCGGGGATAAGAAGACACTTTGGAAGCA  
AGCACTATACCTAATAATTTCTGTTACGTCGTCATCAGCGGACTCGGGGATAAGAAGACACTTTGGAAGCA  
AGCACTATACCTAATAATTTCTGTTACGTCGTCATCAGCGGACTCGGGGATAAGAAGACACTTTGGAAGCA

4528376 4528445  
ATGTGTGGAGCAACAGTGGAGAGAAAAGAAGGTGGCAGTAACAGCAGCAGTAACATCAGCAACGTCGCCA  
ATGTGTGGAGCAACAGTGGAGAGAAAAGAAGGTGGCAGTAACAGCAGCAGTAACATCAGCAACGTCGCCA  
ATGTGTGGAGCAACAGTGGAGAGAAAAGAAGGTGGCAGTAACAGCAGCAGTAACATCAGCAACGTCGCCA  
ATGTGTGGAGCAACAGTGGAGAGAAAAGAAGGTGGCAGTAACAGCAGCAGTAACATCAGCAACGTCGCCA

4528446 4528509  
ACTTTGATAGTGTGAAGACGACAATGACAATGACAATGACAATGACA-----GAGACAGTAACAATAA  
ACTTTGATAGTGTGAAGACGACAATGACAATGACAATGACAATGACAATGACA-----GAGACAGTAACAATAA  
ACTTTGATAGTGTGAAGACGACAATGACAATGACAATGACAATGACA-----GAGACAGTAACAATAA  
ACTTTGATAGTGTGAAGACGACAATGACAATGACAATGACAATGACA-----GAGACAGTAACAATAA

4528510 4528579  
CAATAACAATAACAACACCAATACTGACGATGATGATAAGCTGGCATACTTGGAACTGCACGAGGCATTA  
CAATAACAATAACAACACCAATACTGACGATGATGATAAGCTGGCATACTTGGAACTGCACGAGGCATTA  
CAATAACAATAACAACACCAATACTGACGATGATGATAAGCTGGCATACTTGGAACTGCACGAGGCATTA  
CAATAACAATAACAACACCAATACTGACGATGATGATAAGCTGGCATACTTGGAACTGCACGAGGCATTA  
CAATAACAATAACAACACCAATACTGACGATGATGATAAGCTGGCATACTTGGAACTGCACGAGGCATTA

4528580 4528649  
AAATTGGCTTTTCTGCAACAATACGATTTTTCTAAAAATGTTCAAGACTTGGAAATCATGGAGTTTCTTG  
AAATTGGCTTTTCTGCAACAATACGATTTTTCTAAAAATGTTCAAGACTTGGAAATCATGGAGTTTCTTG  
AAATTGGCTTTTCTGCAACAATACGATTTTTCTAAAAATGTTCAAGACTTGGAAATCATGGAGTTTCTTG  
AAATTGGCTTTTCTGCAACAATACGATTTTTCTAAAAATGTTCAAGACTTGGAAATCATGGAGTTTCTTG  
AAATTGGCTTTTCTGCAACAATACGATTTTTCTAAAAATGTTCAAGACTTGGAAATCATGGAGTTTCTTG

4528650 4528719  
CATGCATGTCCTTGCATAAAGATGGTACTTCAAATATGCCTATGAAATCTCTGCCTGCTTTGCACCCCT  
CATGCATGTCCTTGCATAAAGATGGTACTTCAAATATGCCTATGAAATCTCTGCCTGCTTTGCACCCCT  
CATGCATGTCCTTGCATAAAGATGGTACTTCAAATATGCCTATGAAATCTCTGCCTGCTTTGCACCCCT  
CATGCATGTCCTTGCATAAAGATGGTACTTCAAATATGCCTATGAAATCTCTGCCTGCTTTGCACCCCT  
CATGCATGTCCTTGCATAAAGATGGTACTTCAAATATGCCTATGAAATCTCTGCCTGCTTTGCACCCCT

4528720 4528789  
AATATACACGTGTCGTCTTGTAGCAGCATGTGAGTTACAACGATTGATCGATGAAAAACAATCGACTTG  
AATATACACGTGTCGTCTTGTAGCAGCATGTGAGTTACAACGATTGATCGATGAAAAACAATCGACTTG  
AATATACACGTGTCGTCTTGTAGCAGCATGTGAGTTACAACGATTGATCGATGAAAAACAATCGACTTG  
AATATACACGTGTCGTCTTGTAGCAGCATGTGAGTTACAACGATTGATCGATGAAAAACAATCGACTTG  
AATATACACGTGTCGTCTTGTAGCAGCATGTGAGTTACAACGATTGATCGATGAAAAACAATCGACTTG

4528790 4528859  
TTGTCCATTCCATCGTTTCAAACCGCTGGTTCATTGCTTATGCTCATGTGTTTTGCTTTATCACGCTTG  
TTGTCCATTCCATCGTTTCAAACCGCTGGTTCATTGCTTATGCTCATGTGTTTTGCTTTATCACGCTTG  
TTGTCCATTCCATCGTTTCAAACCGCTGGTTCATTGCTTATGCTCATGTGTTTTGCTTTATCACGCTTG  
TTGTCCATTCCATCGTTTCAAACCGCTGGTTCATTGCTTATGCTCATGTGTTTTGCTTTATCACGCTTG  
TTGTCCATTCCATCGTTTCAAACCGCTGGTTCATTGCTTATGCTCATGTGTTTTGCTTTATCACGCTTG

4528860 4528929  
GTCAAAGAAATTTATATGATGTTCTTTACGAAACCCAAAAAGTCGTTAGGGATATCATTGCAACGGAAGG  
GTCAAAGAAATTTATATGATGTTCTTTACGAAACCCAAAAAGTCGTTAGGGATATCATTGCAACGGAAGG  
GTCAAAGAAATTTATATGATGTTCTTTACGAAACCCAAAAAGTCGTTAGGGATATCATTGCAACGGAAGG  
GTCAAAGAAATTTATATGATGTTCTTTACGAAACCCAAAAAGTCGTTAGGGATATCATTGCAACGGAAGG  
GTCAAAGAAATTTATATGATGTTCTTTACGAAACCCAAAAAGTCGTTAGGGATATCATTGCAACGGAAGG

4528930 4528999  
GTATGCAAAATACACTGCAAGGACTAAGCCCAAGTACCGTATTGTTTCAGCCACGAAGTAATTCATGTAC  
GTATGCAAAATACACTGCAAGGACTAAGCCCAAGTACCGTATTGTTTCAGCCACGAAGTAATTCATGTAC  
GTATGCAAAATACACTGCAAGGACTAAGCCCAAGTACCGTATTGTTTCAGCCACGAAGTAATTCATGTAC  
GTATGCAAAATACACTGCAAGGACTAAGCCCAAGTACCGTATTGTTTCAGCCACGAAGTAATTCATGTAC  
GTATGCAAAATACACTGCAAGGACTAAGCCCAAGTACCGTATTGTTTCAGCCACGAAGTAATTCATGTAC

4529000 4529069  
CCGTGCATTGGAGATGCATTCAATAACATGGTGCATTGGACTTGAGTGAGCTGACAGCTCTGTATGAGG  
CCGTGCATTGGAGATGCATTCAATAACATGGTGCATTGGACTTGAGTGAGCTGACAGCTCTGTATGAGG  
CCGTGCATTGGAGATGCATTCAATAACATGGTGCATTGGACTTGAGTGAGCTGACAGCTCTGTATGAGG  
CCGTGCATTGGAGATGCATTCAATAACATGGTGCATTGGACTTGAGTGAGCTGACAGCTCTGTATGAGG  
CCGTGCATTGGAGATGCATTCAATAACATGGTGCATTGGACTTGAGTGAGCTGACAGCTCTGTATGAGG

4529070 4529139  
GGATGTTTGCCAAAGTTCAGGACTTGTAAAAGAGCTATGTTTTGATATGAATGTGGAAAACTATTACC  
GGATGTTTGCCAAAGTTCAGGACTTGTAAAAGAGCTATGTTTTGATATGAATGTGGAAAACTATTACC  
GGATGTTTGCCAAAGTTCAGGACTTGTAAAAGAGCTATGTTTTGATATGAATGTGGAAAACTATTACC  
GGATGTTTGCCAAAGTTCAGGACTTGTAAAAGAGCTATGTTTTGATATGAATGTGGAAAACTATTACC  
GGATGTTTGCCAAAGTTCAGGACTTGTAAAAGAGCTATGTTTTGATATGAATGTGGAAAACTATTACC

4529140 4529209  
CATTTTCGTTACTAAGGTCAATTGGAGATGACATAAACAAATAGTAAATGGGATATTCATTCTTTAAAGAG  
CATTTTCGTTACTAAGGTCAATTGGAGATGACATAAACAAATAGTAAATGGGATATTCATTCTTTAAAGAG  
CATTTTCGTTACTAAGGTCAATTGGAGATGACATAAACAAATAGTAAATGGGATATTCATTCTTTAAAGAG  
CATTTTCGTTACTAAGGTCAATTGGAGATGACATAAACAAATAGTAAATGGGATATTCATTCTTTAAAGAG  
CATTTTCGTTACTAAGGTCAATTGGAGATGACATAAACAAATAGTAAATGGGATATTCATTCTTTAAAGAG

4529210 4529279  
TCGATAGAGATACGTTTCATCTCATAGTGTGCTGTTACGAACAATACTTAAGAACAGTGAACCTTTGTTCATC  
TCGATAGAGATACGTTTCATCTCATAGTGTGCTGTTACGAACAATACTTAAGAACAGTGAACCTTTGTTCATC  
TCGATAGAGATACGTTTCATCTCATAGTGTGCTGTTACGAACAATACTTAAGAACAGTGAACCTTTGTTCATC  
TCGATAGAGATACGTTTCATCTCATAGTGTGCTGTTACGAACAATACTTAAGAACAGTGAACCTTTGTTCATC

4529280 4529349  
GGTTTTTCCCATCGATGTCTAAGAAGGATCTGACAAAAGTTGTTTGGTGGAGTAAGTGATCAGCAAAGAAA  
GGTTTTTCCCATCGATGTCTAAGAAGGATCTGACAAAAGTTGTTTGGTGGAGTAAGTGATCAGCAAAGAAA  
GGTTTTTCCCATCGATGTCTAAGAAGGATCTGACAAAAGTTGTTTGGTGGAGTAAGTGATCAGCAAAGAAA  
GGTTTTTCCCATCGATGTCTAAGAAGGATCTGACAAAAGTTGTTTGGTGGAGTAAGTGATCAGCAAAGAAA

4529350 4529355  
TGAGTGGCACAACCTATAGCAACCCTACAACGACAA-----CTCTAATGAT  
TGAGTGGCACAACCTATAGCAACCCTACAACGACAA-----CTCTAATGAT  
TGAGTGGCACAACCTATAGCAACCCTACAACGACAA**CGACAACGACAACGACAA**-----CTCTAATGAT  
TGAGTGGCACAACCTATAGCAACCCTACAACGACAA**CGACAACGACAACGACAACGACAAC**CTCTAATGAT  
TGAGTGGCACAACCTATAGCAACCCTACAACGACAA**CGACAACGACAACGACAACGACAAC**CTCTAATGAT

4529396 4529465  
AATGACAATGATGTGTTTCTCAAATTACATTGGTCTAAATCTGCTATTAAAAAGTATGAGACAAAGGCAT  
AATGACAATGATGTGTTTCTCAAATTACATTGGTCTAAATCTGCTATTAAAAAGTATGAGACAAAGGCAT  
AATGACAATGATGTGTTTCTCAAATTACATTGGTCTAAATCTGCTATTAAAAAGTATGAGACAAAGGCAT  
AATGACAATGATGTGTTTCTCAAATTACATTGGTCTAAATCTGCTATTAAAAAGTATGAGACAAAGGCAT

4529466 4529535  
CTATCTTCAATGAGTTATTGTTTTGTCTAGTGTACATATCTGCTGGACAACCAGCCAGAGCACAAGAGAT  
CTATCTTCAATGAGTTATTGTTTTGTCTAGTGTACATATCTGCTGGACAACCAGCCAGAGCACAAGAGAT  
CTATCTTCAATGAGTTATTGTTTTGTCTAGTGTACATATCTGCTGGACAACCAGCCAGAGCACAAGAGAT  
CTATCTTCAATGAGTTATTGTTTTGTCTAGTGTACATATCTGCTGGACAACCAGCCAGAGCACAAGAGAT  
CTATCTTCAATGAGTTATTGTTTTGTCTAGTGTACATATCTGCTGGACAACCAGCCAGAGCACAAGAGAT

4529536 4529605  
GGTGTATTGGACTTTGCGGAATGGCAAGTATAAGACTCGCGAATTGTATTGATGTTTGGAAAGGCTGATG  
GGTGTATTGGACTTTGCGGAATGGCAAGTATAAGACTCGCGAATTGTATTGATGTTTGGAAAGGCTGATG  
GGTGTATTGGACTTTGCGGAATGGCAAGTATAAGACTCGCGAATTGTATTGATGTTTGGAAAGGCTGATG  
GGTGTATTGGACTTTGCGGAATGGCAAGTATAAGACTCGCGAATTGTATTGATGTTTGGAAAGGCTGATG

4529606 4529675  
ATTTACAGCAGATACGATAAAGACTCGTAATATGAAGTTTGTGAAAAGCCAATCCCAGGTTTCTTTCTG  
ATTTACAGCAGATACGATAAAGACTCGTAATATGAAGTTTGTGAAAAGCCAATCCCAGGTTTCTTTCTG  
ATTTACAGCAGATACGATAAAGACTCGTAATATGAAGTTTGTGAAAAGCCAATCCCAGGTTTCTTTCTG  
ATTTACAGCAGATACGATAAAGACTCGTAATATGAAGTTTGTGAAAAGCCAATCCCAGGTTTCTTTCTG  
ATTTACAGCAGATACGATAAAGACTCGTAATATGAAGTTTGTGAAAAGCCAATCCCAGGTTTCTTTCTG

4529676 4529745  
AGCCGCTTTCATTTTAGCACTTCGGTACTATGTTTTGGTTCGACCATTGGAAGCATTGATGAAGTATGT  
AGCCGCTTTCATTTTAGCACTTCGGTACTATGTTTTGGTTCGACCATTGGAAGCATTGATGAAGTATGT  
AGCCGCTTTCATTTTAGCACTTCGGTACTATGTTTTGGTTCGACCATTGGAAGCATTGATGAAGTATGT  
AGCCGCTTTCATTTTAGCACTTCGGTACTATGTTTTGGTTCGACCATTGGAAGCATTGATGAAGTATGT

4529746 4529815  
GACAACCGCTGATAGGTCGAAAGTAGCTGTATACTTGGATTTTCATGTTTGTGATTGCTGGCGAACGATTG  
GACAACCGCTGATAGGTCGAAAGTAGCTGTATACTTGGATTTTCATGTTTGTGATTGCTGGCGAACGATTG  
GACAACCGCTGATAGGTCGAAAGTAGCTGTATACTTGGATTTTCATGTTTGTGATTGCTGGCGAACGATTG  
GACAACCGCTGATAGGTCGAAAGTAGCTGTATACTTGGATTTTCATGTTTGTGATTGCTGGCGAACGATTG

4529816 4529885  
CAAAGAGATTTACCGTATCGAATTTTTCCAAAGGCCACCTACCAATGCATTCAAAAACCGTTGGGATTTT  
CAAAGAGATTTACCGTATCGAATTTTTCCAAAGGCCACCTACCAATGCATTCAAAAACCGTTGGGATTTT  
CAAAGAGATTTACCGTATCGAATTTTTCCAAAGGCCACCTACCAATGCATTCAAAAACCGTTGGGATTTT  
CAAAGAGATTTACCGTATCGAATTTTTCCAAAGGCCACCTACCAATGCATTCAAAAACCGTTGGGATTTT

4529886 4529955  
GAAACTACAGGCACATTGCTCACTATTTTAAAGAAAAAACAATCGAGGAAGAAATGACGAGGGAATCATA  
GAAACTACAGGCACATTGCTCACTATTTTAAAGAAAAAACAATCGAGGAAGAAATGACGAGGGAATCATA  
GAAACTACAGGCACATTGCTCACTATTTTAAAGAAAAAACAATCGAGGAAGAAATGACGAGGGAATCATA  
GAAACTACAGGCACATTGCTCACTATTTTAAAGAAAAAACAATCGAGGAAGAAATGACGAGGGAATCATA  
GAAACTACAGGCACATTGCTCACTATTTTAAAGAAAAAACAATCGAGGAAGAAATGACGAGGGAATCATA

4529956 4530025  
TTTCGATTTACAGGCTGGACATACACGAAACACAGCGCTCTACATCTATGGGCGCACTATGGACAACCTG  
TTTCGATTTACAGGCTGGACATACACGAAACACAGCGCTCTACATCTATGGGCGCACTATGGACAACCTG  
TTTCGATTTACAGGCTGGACATACACGAAACACAGCGCTCTACATCTATGGGCGCACTATGGACAACCTG  
TTTCGATTTACAGGCTGGACATACACGAAACACAGCGCTCTACATCTATGGGCGCACTATGGACAACCTG  
TTTCGATTTACAGGCTGGACATACACGAAACACAGCGCTCTACATCTATGGGCGCACTATGGACAACCTG

4530026 4530095  
CATTATCTGCCGTCGGATTATTTTCGCCAACTTTTTTCGTGCAAGCTATAAGTGGCAGGAACATTACAGA  
CATTATCTGCCGTCGGATTATTTTCGCCAACTTTTTTCGTGCAAGCTATAAGTGGCAGGAACATTACAGA  
CATTATCTGCCGTCGGATTATTTTCGCCAACTTTTTTCGTGCAAGCTATAAGTGGCAGGAACATTACAGA  
CATTATCTGCCGTCGGATTATTTTCGCCAACTTTTTTCGTGCAAGCTATAAGTGGCAGGAACATTACAGA  
CATTATCTGCCGTCGGATTATTTTCGCCAACTTTTTTCGTGCAAGCTATAAGTGGCAGGAACATTACAGA

4530096 4530165  
TTTCGAGATAACCCGACCCATGGACTGTTGGTGGAAACAAAGCACCCATTCAAGCGAGTTGATCAATT  
TTTCGAGATAACCCGACCCATGGACTGTTGGTGGAAACAAAGCACCCATTCAAGCGAGTTGATCAATT  
TTTCGAGATAACCCGACCCATGGACTGTTGGTGGAAACAAAGCACCCATTCAAGCGAGTTGATCAATT  
TTTCGAGATAACCCGACCCATGGACTGTTGGTGGAAACAAAGCACCCATTCAAGCGAGTTGATCAATT  
TTTCGAGATAACCCGACCCATGGACTGTTGGTGGAAACAAAGCACCCATTCAAGCGAGTTGATCAATT

4530166 4530235  
GGAGGAAGCGCTGAATGAGAAGCTGGCAAGGTTGGTAGGTGAACAAATGGTGGAGGGGGACAAGGAAAAG  
GGAGGAAGCGCTGAATGAGAAGCTGGCAAGGTTGGTAGGTGAACAAATGGTGGAGGGGGACAAGGAAAAG  
GGAGGAAGCGCTGAATGAGAAGCTGGCAAGGTTGGTAGGTGAACAAATGGTGGAGGGGGACAAGGAAAAG  
GGAGGAAGCGCTGAATGAGAAGCTGGCAAGGTTGGTAGGTGAACAAATGGTGGAGGGGGACAAGGAAAAG  
GGAGGAAGCGCTGAATGAGAAGCTGGCAAGGTTGGTAGGTGAACAAATGGTGGAGGGGGACAAGGAAAAG

4530236 4530305  
GACAAGACAAATGAGGAGAAGAACAAGGACGAGGTAAAGGCTGAAATGACACAGCCCGTTGTAATCAAG  
GACAAGACAAATGAGGAGAAGAACAAGGACGAGGTAAAGGCTGAAATGACACAGCCCGTTGTAATCAAG  
GACAAGACAAATGAGGAGAAGAACAAGGACGAGGTAAAGGCTGAAATGACACAGCCCGTTGTAATCAAG  
GACAAGACAAATGAGGAGAAGAACAAGGACGAGGTAAAGGCTGAAATGACACAGCCCGTTGTAATCAAG  
GACAAGACAAATGAGGAGAAGAACAAGGACGAGGTAAAGGCTGAAATGACACAGCCCGTTGTAATCAAG

4530306 4530375  
ACTCTCATGACTTACAAGACCAATTGGCCACTACGCCACCACCGCCACCACCGCATTTCACTACCGCCAGG  
ACTCTCATGACTTACAAGACCAATTGGCCACTACGCCACCACCGCCACCACCGCATTTCACTACCGCCAGG  
ACTCTCATGACTTACAAGACCAATTGGCCACTACGCCACCACCGCCACCACCGCATTTCACTACCGCCAGG  
ACTCTCATGACTTACAAGACCAATTGGCCACTACGCCACCACCGCCACCACCGCATTTCACTACCGCCAGG  
ACTCTCATGACTTACAAGACCAATTGGCCACTACGCCACCACCGCCACCACCGCATTTCACTACCGCCAGG

4530376 4530445  
ACTTCTTCAACCATCTCAAACCTTCTGTTCAACATTGTTGTTGGGCATTGCTCAATATTATGGTCTCGAA  
ACTTCTTCAACCATCTCAAACCTTCTGTTCAACATTGTTGTTGGGCATTGCTCAATATTATGGTCTCGAA  
ACTTCTTCAACCATCTCAAACCTTCTGTTCAACATTGTTGTTGGGCATTGCTCAATATTATGGTCTCGAA  
ACTTCTTCAACCATCTCAAACCTTCTGTTCAACATTGTTGTTGGGCATTGCTCAATATTATGGTCTCGAA  
ACTTCTTCAACCATCTCAAACCTTCTGTTCAACATTGTTGTTGGGCATTGCTCAATATTATGGTCTCGAA

4530446 4530515  
GCGAAATCCGTTTCGCTGAAACAATTTCAATCGGTTTATTTTCTCTTTTAAATCGTATGAATTTGATTA  
GCGAAATCCGTTTCGCTGAAACAATTTCAATCGGTTTATTTTCTCTTTTAAATCGTATGAATTTGATTA  
GCGAAATCCGTTTCGCTGAAACAATTTCAATCGGTTTATTTTCTCTTTTAAATCGTATGAATTTGATTA  
GCGAAATCCGTTTCGCTGAAACAATTTCAATCGGTTTATTTTCTCTTTTAAATCGTATGAATTTGATTA  
GCGAAATCCGTTTCGCTGAAACAATTTCAATCGGTTTATTTTCTCTTTTAAATCGTATGAATTTGATTA

4530516 4530585  
CCGTACTCCAACCTGGAGGTGAAAGTCTTTGTCGTTTTTGATACCGGCGCTCATCGAAAAAAAAGACA  
CCGTACTCCAACCTGGAGGTGAAAGTCTTTGTCGTTTTTGATACCGGCGCTCATCGAAAAAAAAGACA  
CCGTACTCCAACCTGGAGGTGAAAGTCTTTGTCGTTTTTGATACCGGCGCTCATCGAAAAAAAAGACA  
CCGTACTCCAACCTGGAGGTGAAAGTCTTTGTCGTTTTTGATACCGGCGCTCATCGAAAAAAAAGACA  
CCGTACTCCAACCTGGAGGTGAAAGTCTTTGTCGTTTTTGATACCGGCGCTCATCGAAAAAAAAGACA

4530586 4530655  
AACCCCAGGAAAGGTGATGAATATGGTCACGCTGGTTCTAGTGCCCATGATGTCGTTACGGCAAGATATG  
AACCCCAGGAAAGGTGATGAATATGGTCACGCTGGTTCTAGTGCCCATGATGTCGTTACGGCAAGATATG  
AACCCCAGGAAAGGTGATGAATATGGTCACGCTGGTTCTAGTGCCCATGATGTCGTTACGGCAAGATATG  
AACCCCAGGAAAGGTGATGAATATGGTCACGCTGGTTCTAGTGCCCATGATGTCGTTACGGCAAGATATG  
AACCCCAGGAAAGGTGATGAATATGGTCACGCTGGTTCTAGTGCCCATGATGTCGTTACGGCAAGATATG

4530656 4530725  
ATGCTCAGAGTGAATGAAAAGGGACTGCTTGTGTTGTTCCGGGAAATGGACCGCATTCAAAGATGTACGAT  
ATGCTCAGAGTGAATGAAAAGGGACTGCTTGTGTTGTTCCGGGAAATGGACCGCATTCAAAGATGTACGAT  
ATGCTCAGAGTGAATGAAAAGGGACTGCTTGTGTTGTTCCGGGAAATGGACCGCATTCAAAGATGTACGAT  
ATGCTCAGAGTGAATGAAAAGGGACTGCTTGTGTTGTTCCGGGAAATGGACCGCATTCAAAGATGTACGAT  
ATGCTCAGAGTGAATGAAAAGGGACTGCTTGTGTTGTTCCGGGAAATGGACCGCATTCAAAGATGTACGAT

4530726 4530795  
TGACTTTAGAGACGCAACTTCCCGATTTGTTTATCTTGACATACGAGTCAGCATTAAACCAACAGTGGTCT  
TGACTTTAGAGACGCAACTTCCCGATTTGTTTATCTTGACATACGAGTCAGCATTAAACCAACAGTGGTCT  
TGACTTTAGAGACGCAACTTCCCGATTTGTTTATCTTGACATACGAGTCAGCATTAAACCAACAGTGGTCT  
TGACTTTAGAGACGCAACTTCCCGATTTGTTTATCTTGACATACGAGTCAGCATTAAACCAACAGTGGTCT  
TGACTTTAGAGACGCAACTTCCCGATTTGTTTATCTTGACATACGAGTCAGCATTAAACCAACAGTGGTCT

4530796 4530865  
TCGGTTTTTTGAAAGTTTGGCAACACTTGGTCGTTTGGCACGAGTGGTAATTGATGAAGCACATTTGTTA  
TCGGTTTTTTGAAAGTTTGGCAACACTTGGTCGTTTGGCACGAGTGGTAATTGATGAAGCACATTTGTTA  
TGGTTTTTTGAAAGTTTGGCAACACTTGGTCGTTTGGCACGAGTGGTAATTGATGAAGCACATTTGTTA  
TCGGTTTTTTGAAAGTTTGGCAACACTTGGTCGTTTGGCACGAGTGGTAATTGATGAAGCACATTTGTTA  
TCGGTTTTTTGAAAGTTTGGCAACACTTGGTCGTTTGGCACGAGTGGTAATTGATGAAGCACATTTGTTA

4530866 4530935  
CTCACCAGTGGAGCATGGAGAACGGCTTTGTTCGAGAGCATCGCGGTTGTCTGGCTTGTATGCACCATTGC  
CTCACCAGTGGAGCATGGAGAACGGCTTTGTTCGAGAGCATCGCGGTTGTCTGGCTTGTATGCACCATTGC  
CTCACCAGTGGAGCATGGAGAACGGCTTTGTTCGAGAGCATCGCGGTTGTCTGGCTTGTATGCACCATTGC  
CTCACCAGTGGAGCATGGAGAACGGCTTTGTTCGAGAGCATCGCGGTTGTCTGGCTTGTATGCACCATTGC  
CTCACCAGTGGAGCATGGAGAACGGCTTTGTTCGAGAGCATCGCGGTTGTCTGGCTTGTATGCACCATTGC

4530936 4531005  
ACTTGTGAGTGCCACCTTTCCAGGCAACTAGAGATGGTTGCCAGACAAACGTTTTGTACAAACTTTTA  
ACTTGTGAGTGCCACCTTTCCAGGCAACTAGAGATGGTTGCCAGACAAACGTTTTGTACAAACTTTTA  
ACTTGTGAGTGCCACCTTTCCAGGCAACTAGAGATGGTTGCCAGACAAACGTTTTGTACAAACTTTTA  
ACTTGTGAGTGCCACCTTTCCAGGCAACTAGAGATGGTTGCCAGACAAACGTTTTGTACAAACTTTTA  
ACTTGTGAGTGCCACCTTTCCAGGCAACTAGAGATGGTTGCCAGACAAACGTTTTGTACAAACTTTTA

4531006 4531075  
CGTTTTACGAGAAACGTTACTGCACGGGAAAACATCTTTTACTTTTTGCATCCCTATGATAAATACCGAG  
CGTTTTACGAGAAACGTTACTGCACGGGAAAACATCTTTTACTTTTTGCATCCCTATGATAAATACCGAG  
CGTTTTACGAGAAACGTTACTGCACGGGAAAACATCTTTTACTTTTTGCATCCCTATGATAAATACCGAG  
CGTTTTACGAGAAACGTTACTGCACGGGAAAACATCTTTTACTTTTTGCATCCCTATGATAAATACCGAG  
CGTTTTACGAGAAACGTTACTGCACGGGAAAACATCTTTTACTTTTTGCATCCCTATGATAAATACCGAG

4531076 4531145  
TTTTTGTGGACTTGCGAACGTTGATGAAACGAACAAAGGTCTTTGAAGGTGATGGACGTGCTATCATCT  
TTTTTGTGGACTTGCGAACGTTGATGAAACGAACAAAGGTCTTTGAAGGTGATGGACGTGCTATCATCT  
TTTTTGTGGACTTGCGAACGTTGATGAAACGAACAAAGGTCTTTGAAGGTGATGGACGTGCTATCATCT  
TTTTTGTGGACTTGCGAACGTTGATGAAACGAACAAAGGTCTTTGAAGGTGATGGACGTGCTATCATCT  
TTTTTGTGGACTTGCGAACGTTGATGAAACGAACAAAGGTCTTTGAAGGTGATGGACGTGCTATCATCT

4531146 4531215  
TTTGTGGAACCAAAAAGGATGTCGAATACATTTCATCGTCTTTCACCAGTCGGACTTGTTCGCTCACAC  
TTTGTGGAACCAAAAAGGATGTCGAATACATTTCATCGTCTTTCACCAGTCGGACTTGTTCGCTCACAC  
TTTGTGGAACCAAAAAGGATGTCGAATACATTTCATCGTCTTTCACCAGTCGGACTTGTTCGCTCACAC  
TTTGTGGAACCAAAAAGGATGTCGAATACATTTCATCGTCTTTCACCAGTCGGACTTGTTCGCTCACAC  
TTTGTGGAACCAAAAAGGATGTCGAATACATTTCATCGTCTTTCACCAGTCGGACTTGTTCGCTCACAC

4531216 4531285  
CCATGTAACCAATTTACACAGGAGATGTAAGCGACGAAGAACGACAAATGAACTTTGACGCGTTTCGAAAT  
CCATGTAACCAATTTACACAGGAGATGTAAGCGACGAAGAACGACAAATGAACTTTGACGCGTTTCGAAAT  
CCATGTAACCAATTTACACAGGAGATGTAAGCGACGAAGAACGACAAATGAACTTTGACGCGTTTCGAAAT  
CCATGTAACCAATTTACACAGGAGATGTAAGCGACGAAGAACGACAAATGAACTTTGACGCGTTTCGAAAT  
CCATGTAACCAATTTACACAGGAGATGTAAGCGACGAAGAACGACAAATGAACTTTGACGCGTTTCGAAAT



4531286 4531355  
GCAAAATGGGAAGACACGAATCATGATCGCTACCAAGGCATTTCGGACTCGGTATCAACTATATGGGAGTGC  
GCAAAATGGGAAGACACGAATCATGATCGCTACCAAGGCATTTCGGACTCGGTATCAACTATATGGGAGTGC  
GCAAAATGGGAAGACACGAATCATGATCGCTACCAAGGCATTTCGGACTCGGTATCAACTATATGGGAGTGC  
GCAAAATGGGAAGACACGAATCATGATCGCTACCAAGGCATTTCGGACTCGGTATCAACTATATGGGAGTGC

4531356 4531425  
GTTTAGTAGTACACTATGGATTACCAGCTTCATCTATGGATTATGTACAGGAGACAGGTCGAGCTGGAAAG  
GTTTAGTAGTACACTATGGATTACCAGCTTCATCTATGGATTATGTACAGGAGACAGGTCGAGCTGGAAAG  
GTTTAGTAGTACACTATGGATTACCAGCTTCATCTATGGATTATGTACAGGAGACAGGTCGAGCTGGAAAG  
GTTTAGTAGTACACTATGGATTACCAGCTTCATCTATGGATTATGTACAGGAGACAGGTCGAGCTGGAAAG

4531426 4531485  
AGATGGCAAGTATGCGATTGCAGCATTGTTTTACGAGAAATATGATTCTACATGGTCGAGCTACGTAGAG  
AGATGGCAAGTATGCGATTGCAGCATTGTTTTACGAGAAATATGATTCTACATGGTCGAGCTACGTAGAG  
AGATGGCAAGTATGCGATTGCAGCATTGTTTTACGAGAAATATGATTCTACATGGTCGAGCTACGTAGAG  
AGATGGCAAGTATGCGATTGCAGCATTGTTTTACGAGAAATATGATTCTACATGGTCGAGCTACGTAGAG

4531496 4531565  
GATTCGATGAAAACTTCTTAATGATAATACGATGTGTGTTTCGATCGTTTCTCGCAAGTAAAATGGATG  
GATTCGATGAAAACTTCTTAATGATAATACGATGTGTGTTTCGATCGTTTCTCGCAAGTAAAATGGATG  
GATTCGATGAAAACTTCTTAATGATAATACGATGTGTGTTTCGATCGTTTCTCGCAAGTAAAATGGATG  
GATTCGATGAAAACTTCTTAATGATAATACGATGTGTGTTTCGATCGTTTCTCGCAAGTAAAATGGATG

4531566 4531635  
GCGAATGTGTATGTTGTGCATCGTTTGTAACTGTGTTTACTGCTCAAGATGCTCAGATTCTGTTACTTGG  
GCGAATGTGTATGTTGTGCATCGTTTGTAACTGTGTTTACTGCTCAAGATGCTCAGATTCTGTTACTTGG  
GCGAATGTGTATGTTGTGCATCGTTTGTAACTGTGTTTACTGCTCAAGATGCTCAGATTCTGTTACTTGG  
GCGAATGTGTATGTTGTGCATCGTTTGTAACTGTGTTTACTGCTCAAGATGCTCAGATTCTGTTACTTGG

4531636 4531705  
TGAAGAATCAACTGTGTCTACGATGTATGGAGTAAAACCGACATTGCCAGAAAACCCGAAACCAGCCATT  
TGAAGAATCAACTGTGTCTACGATGTATGGAGTAAAACCGACATTGCCAGAAAACCCGAAACCAGCCATT  
TGAAGAATCAACTGTGTCTACGATGTATGGAGTAAAACCGACATTGCCAGAAAACCCGAAACCAGCCATT  
TGAAGAATCAACTGTGTCTACGATGTATGGAGTAAAACCGACATTGCCAGAAAACCCGAAACCAGCCATT

4531706 4531775  
GCAACACATTTCGCGTTATAATGCATCGTTTTTCGCTTCCCCCCACCACAGCCAGGGAATAGCAGTGGTA  
GCAACACATTTCGCGTTATAATGCATCGTTTTTCGCTTCCCCCCACCACAGCCAGGGAATAGCAGTGGTA  
GCAACACATTTCGCGTTATAATGCATCGTTTTTCGCTTCCCCCCACCACAGCCAGGGAATAGCAGTGGTA  
GCAACACATTTCGCGTTATAATGCATCGTTTTTCGCTTCCCCCCACCACAGCCAGGGAATAGCAGTGGTA

4531776 4531845  
TGAGTGTCTATGAACACTAACACTACTAGTACTACGCCAGTGTCTTTGTGCGGAATATATCGGAAATCACTTT  
TGAGTGTCTATGAACACTAACACTACTAGTACTACGCCAGTGTCTTTGTGCGGAATATATCGGAAATCACTTT  
TGAGTGTCTATGAACACTAACACTACTAGTACTACGCCAGTGTCTTTGTGCGGAATATATCGGAAATCACTTT  
TGAGTGTCTATGAACACTAACACTACTAGTACTACGCCAGTGTCTTTGTGCGGAATATATCGGAAATCACTTT

4531846 4531915  
GTTCCCTTCGCTGTATCGCCAACATGGAAGAAAAGCTTTGGCAATGCTAATACGAATCTAAAGTATGGT  
GTTCCCTTCGCTGTATCGCCAACATGGAAGAAAAGCTTTGGCAATGCTAATACGAATCTAAAGTATGGT  
GTTCCCTTCGCTGTATCGCCAACATGGAAGAAAAGCTTTGGCAATGCTAATACGAATCTAAAGTATGGT  
GTTCCCTTCGCTGTATCGCCAACATGGAAGAAAAGCTTTGGCAATGCTAATACGAATCTAAAGTATGGT

4531916 4531985  
TTGGAAGACATGTCGCTCAGCCATCGTCGTGGTCATAAACGCACATACGATGAACATTTGAACAATGTAC  
TTGGAAGACATGTCGCTCAGCCATCGTCGTGGTCATAAACGCACATACGATGAACATTTGAACAATGTAC  
TTGGAAGACATGTCGCTCAGCCATCGTCGTGGTCATAAACGCACATACGATGAACATTTGAACAATGTAC  
TTGGAAGACATGTCGCTCAGCCATCGTCGTGGTCATAAACGCACATACGATGAACATTTGAACAATGTAC

4531986 4532055  
AACAGGGCGTCAACCATGACATGAATCGTGTTCATGGTAGTGTGGAGGTATGAGTGGTATTGTTGGTAT  
AACAGGGCGTCAACCATGACATGAATCGTGTTCATGGTAGTGTGGAGGTATGAGTGGTATTGTTGGTAT  
AACAGGGCGTCAACCATGACATGAATCGTGTTCATGGTAGTGTGGAGGTATGAGTGGTATTGTTGGTAT  
AACAGGGCGTCAACCATGACATGAATCGTGTTCATGGTAGTGTGGAGGTATGAGTGGTATTGTTGGTAT  
AACAGGGCGTCAACCATGACATGAATCGTGTTCATGGTAGTGTGGAGGTATGAGTGGTATTGTTGGTAT

4532056 4532119  
TGGTATTGGTATTGGTGATGGTGATGGTGATGG-----TGATGTTGATTCTCGTACCATTCAATTCGCC  
TGGTATTGGTATTGGTGATGGTGATGGTGATGG-----TGATGTTGATTCTCGTACCATTCAATTCGCC  
TGGTATTGGTATTGGTGATGGTGATGGTGATGGTGATGGTGATGG-----TGATGTTGATTCTCGTACCATTCAATTCGCC  
TGGTATTGGTATTGGTGATGGTGATGGTGATGGTGATGG-----TGATGTTGATTCTCGTACCATTCAATTCGCC

4532120 4532189  
GAGTATAAAAGTCGTGTGCAAGCCGTCAAAAAACAATGGGTAGACTCAACTGACATTTCCAGCACAACCTCG  
GAGTATAAAAGTCGTGTGCAAGCCGTCAAAAAACAATGGGTAGACTCAACTGACATTTCCAGCACAACCTCG  
GAGTATAAAAGTCGTGTGCAAGCCGTCAAAAAACAATGGGTAGACTCAACTGACATTTCCAGCACAACCTCG  
GAGTATAAAAGTCGTGTGCAAGCCGTCAAAAAACAATGGGTAGACTCAACTGACATTTCCAGCACAACCTCG  
GAGTATAAAAGTCGTGTGCAAGCCGTCAAAAAACAATGGGTAGACTCAACTGACATTTCCAGCACAACCTCG

4532190 4532259  
AGCGATTCTTTTCGAGTGTATAAAGATGAATGTCTAAGTTGCACTCTGGTAAACCAGACACAGAAATTTCG  
AGCGATTCTTTTCGAGTGTATAAAGATGAATGTCTAAGTTGCACTCTGGTAAACCAGACACAGAAATTTCG  
AGCGATTCTTTTCGAGTGTATAAAGATGAATGTCTAAGTTGCACTCTGGTAAACCAGACACAGAAATTTCG  
AGCGATTCTTTTCGAGTGTATAAAGATGAATGTCTAAGTTGCACTCTGGTAAACCAGACACAGAAATTTCG

4532260 4532329  
TGCTCATAACGGGAAAGCATGCCCGTAGCCTTATCTACTTGTATAAAATGTTGGCAAGGCCGACCACAAC  
TGCTCATAACGGGAAAGCATGCCCGTAGCCTTATCTACTTGTATAAAATGTTGGCAAGGCCGACCACAAC  
TGCTCATAACGGGAAAGCATGCCCGTAGCCTTATCTACTTGTATAAAATGTTGGCAAGGCCGACCACAAC  
TGCTCATAACGGGAAAGCATGCCCGTAGCCTTATCTACTTGTATAAAATGTTGGCAAGGCCGACCACAAC

4532330 4532399  
TTGCGAGAATGTAACTACGATTCGATTTCAAGGACTTGTGTTTTTTTGTGGTTTTGACAAAGTTTGAAC  
TTGCGAGAATGTAACTACGATTCGATTTCAAGGACTTGTGTTTTTTTGTGGTTTTGACAAAGTTTGAAC  
TTGCGAGAATGTAACTACGATTCGATTTCAAGGACTTGTGTTTTTTTGTGGTTTTGACAAAGTTTGAAC  
TTGCGAGAATGTAACTACGATTTCAAGGACTTGTGTTTTTTTGTGGTTTTGACAAAGTTTGAAC

4532400 4532469  
ATGCCGACAGTGATATGGCTTACACTTCTGACTGTAGGTATAGGCTAGAAAGGCAAACCTTGATATCGTT  
ATGCCGACAGTGATATGGCTTACACTTCTGACTGTAGGTATAGGCTAGAAAGGCAAACCTTGATATCGTT  
ATGCCGACAGTGATATGGCTTACACTTCTGACTGTAGGTATAGGCTAGAAAGGCAAACCTTGATATCGTT  
ATGCCGACAGTGATATGGCTTACACTTCTGACTGTAGGTATAGGCTAGAAAGGCAAACCTTGATATCGTT

4532470 4532539  
AGTTTACTATGCTTGGAACAATGTACAATACCGAAGGACTATTGCAGATAAATTTTACAAGGTGATGTA  
AGTTTACTATGCTTGGAACAATGTACAATACCGAAGGACTATTGCAGATAAATTTTACAAGGTGATGTA  
AGTTTACTATGCTTGGAACAATGTACAATACCGAAGGACTATTGCAGATAAATTTTACAAGGTGATGTA  
AGTTTACTATGCTTGGAACAATGTACAATACCGAAGGACTATTGCAGATAAATTTTACAAGGTGATGTA

4532540 4532609  
CGTGATCAAGCTTTTTATGGATTGTGTGTTGCTCTACAACCTACGAATTCGCATTTGTTCTAGTTATTC  
CGTGATCAAGCTTTTTATGGATTGTGTGTTGCTCTACAACCTACGAATTCGCATTTGTTCTAGTTATTC  
CGTGATCAAGCTTTTTATGGATTGTGTGTTGCTCTACAACCTACGAATTCGCATTTGTTCTAGTTATTC  
CGTGATCAAGCTTTTTATGGATTGTGTGTTGCTCTACAACCTACGAATTCGCATTTGTTCTAGTTATTC

4532610 4532679  
ATTACTTGTGCTGATGTTTTGCAAATCATGTAATTTTTTACTGATGCAAGACAACGTTTTCATATCGTG  
ATTACTTGTGCTGATGTTTTGCAAATCATGTAATTTTTTACTGATGCAAGACAACGTTTTCATATCGTG  
ATTACTTGTGCTGATGTTTTGCAAATCATGTAATTTTTTACTGATGCAAGACAACGTTTTCATATCGTG  
ATTACTTGTGCTGATGTTTTGCAAATCATGTAATTTTTTACTGATGCAAGACAACGTTTTCATATCGTG

4532680 4532749  
**TTGCACAAAAGTAAGGGAGAGGCAGAAAAAGTCAGAGTGCTTTTCATTGTTAAAGTTACCATCCCCACC**  
**TTGCACAAAAGTAAGGGAGAGGCAGAAAAAGTCAGAGTGCTTTTCATTGTTAAAGTTACCATCCCCACC**  
**TTGCACAAAAGTAAGGGAGAGGCAGAAAAAGTCAGAGTGCTTTTCATTGTTAAAGTTACCATCCCCACC**  
**TTGCACAAAAGTAAGGGAGAGGCAGAAAAAGTCAGAGTGCTTTTCATTGTTAAAGTTACCATCCCCACC**

4532750 4532819  
**CCACCCAACGGATGTTGATGCAAAAGTACGAGTAAAATATAACAAGTTGGTGGAGATGATTGAATATGTT**  
**CCACCCAACGGATGTTGATGCAAAAGTACGAGTAAAATATAACAAGTTGGTGGAGATGATTGAATATGTT**  
**CCACCCAACGGATGTTGATGCAAAAGTACGAGTAAAATATAACAAGTTGGTGGAGATGATTGAATATGTT**  
**CCACCCAACGGATGTTGATGCAAAAGTACGAGTAAAATATAACAAGTTGGTGGAGATGATTGAATATGTT**

4532820 4532889  
**AGTAAATGTTGTTAAATAGGATAAAATTAACGAATGAAATGAAAATAAAGCTGAAATATGCATCAATGATTT**  
**AGTAAATGTTGTTAAATAGGATAAAATTAACGAATGAAATGAAAATAAAGCTGAAATATGCATCAATGATTT**  
**AGTAAATGTTGTTAAATAGGATAAAATTAACGAATGAAATGAAAATAAAGCTGAAATATGCATCAATGATTT**  
**AGTAAATGTTGTTAAATAGGATAAAATTAACGAATGAAATGAAAATAAAGCTGAAATATGCATCAATGATTT**

4532890 4532959  
**TGAAATGAATGAAAATAATGTTTTTCGCAAAATAATTATTGAAATAGCTTGCATATTATATTATTAATTC**  
**TGAAATGAATGAAAATAATGTTTTTCGCAAAATAATTATTGAAATAGCTTGCATATTATATTATTAATTC**  
**TGAAATGAATGAAAATAATGTTTTTCGCAAAATAATTATTGAAATAGCTTGCATATTATATTATTAATTC**  
**TGAAATGAATGAAAATAATGTTTTTCGCAAAATAATTATTGAAATAGCTTGCATATTATATTATTAATTC**

4532960 4533029  
**AATCAACTATTTACAAAGACAAGTTTTTATAACTTTTCGAAAATCAAAGTATTCAAAATTTTGGTTTGCT**  
**AATCAACTATTTACAAAGACAAGTTTTTATAACTTTTCGAAAATCAAAGTATTCAAAATTTTGGTTTGCT**  
**AATCAACTATTTACAAAGACAAGTTTTTATAACTTTTCGAAAATCAAAGTATTCAAAATTTTGGTTTGCT**  
**AATCAACTATTTACAAAGACAAGTTTTTATAACTTTTCGAAAATCAAAGTATTCAAAATTTTGGTTTGCT**

4533030 4533099  
**TAGTATAAATGATATTCGTTGGCAAATTTATCTTATCTTTTGTATTTCGCTTACAAGTAAATTTGATAGA**  
**TAGTATAAATGATATTCGTTGGCAAATTTATCTTATCTTTTGTATTTCGCTTACAAGTAAATTTGATAGA**  
**TAGTATAAATGATATTCGTTGGCAAATTTATCTTATCTTTTGTATTTCGCTTACAAGTAAATTTGATAGA**  
**TAGTATAAATGATATTCGTTGGCAAATTTATCTTATCTTTTGTATTTCGCTTACAAGTAAATTTGATAGA**

4533100 4533144  
**CTTGTATGTTGTTTTTCATATCGGAACATTCATGAAGGAGAAGGCA**  
**CTTGTATGTTGTTTTTCATATCGGAACATTCATGAAGGAGAAGGCA**  
**CTTGTATGTTGTTTTTCATATCGGAACATTCATGAAGGAGAAGGCA**  
**CTTGTATGTTGTTTTTCATATCGGAACATTCATGAAGGAGAAGGCA**

**Supplementary Fig. 9 Sequence alignment of the *tlh1–4* genes in *972SD4* with the PomBase-*tlh2* gene.**

These sequences cover the same region as shown in Fig. 8b. Differences in sequences between PomBase-*tlh2* and the others are highlighted in yellow. Putative first Met codons, uM, uM', dM, and dM', and termination codons, T, are indicated in red and blue, respectively (also see Fig. 8b).

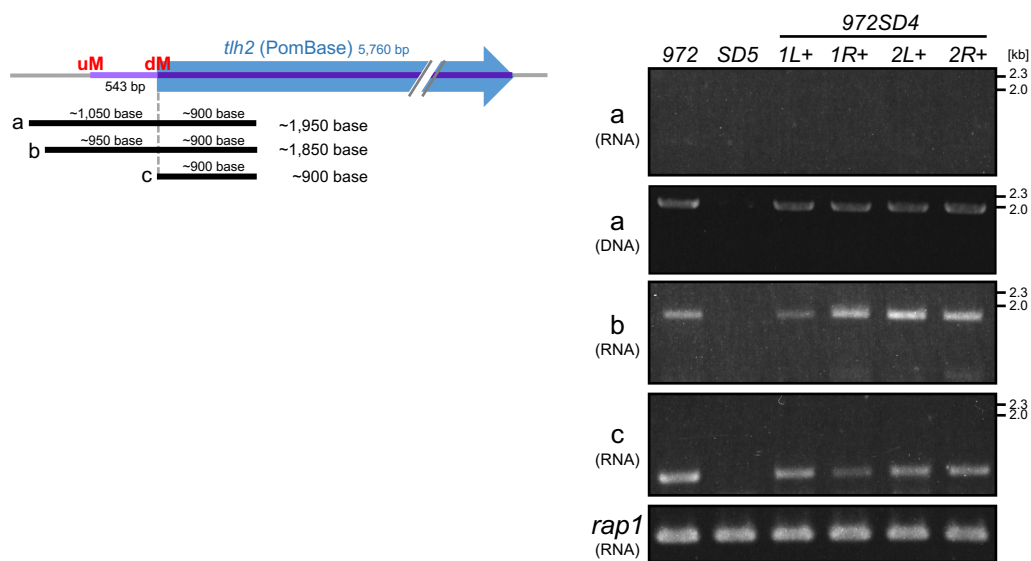

**Supplementary Fig. 10 RNA expression from the upstream region of the *tlh* genes.**

Expression of RNA from various regions (a–c) of the *tlh* loci and the *rap1* locus (control) was analyzed by RT-PCR in strains 972, SD5, and 972SD4. The PCR products were analyzed by gel electrophoresis. Genomic DNA of region (a) was also analyzed as a control of PCR (the second row). Note that primers used in PCRs for the a–c regions recognize all of the *tlh1–4* genes. These data were reproduced twice.

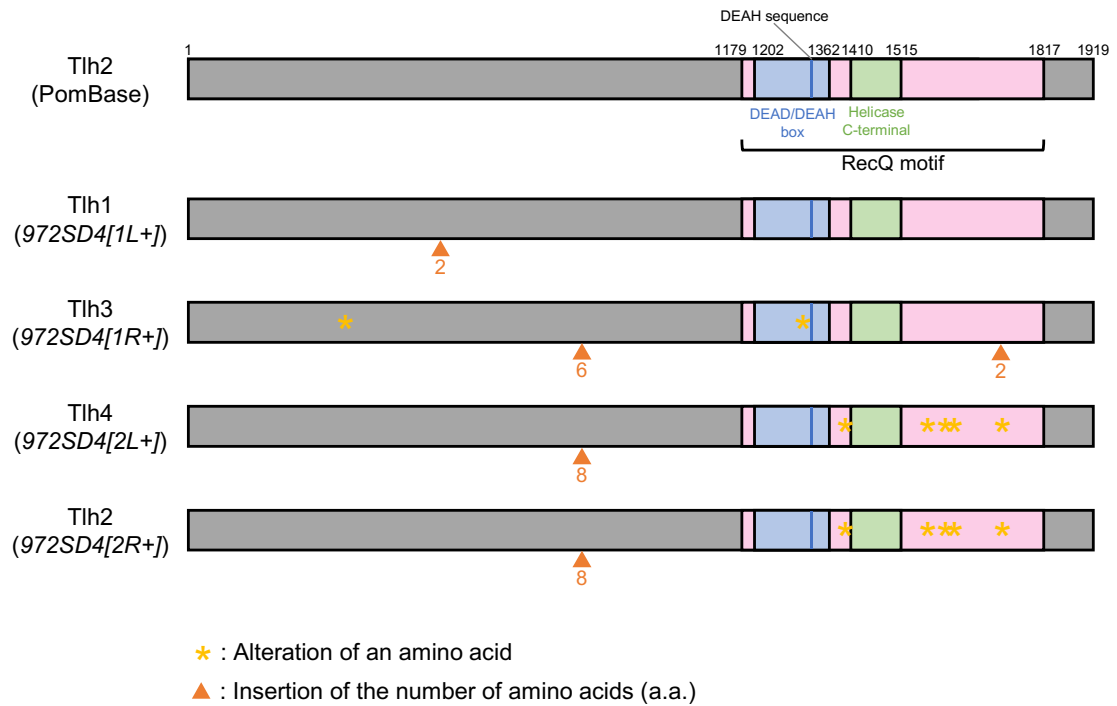

**Supplementary Fig. 11 Variation of amino acid sequences among Tlh1–4 in 972SD4.**

Comparison of amino acid sequences of Tlh1–4 proteins in 972SD4 with that of Tlh2 in PomBase. Yellow asterisk, alteration of an amino acid; orange triangle, insertion of the number of amino acids. Conserved domains in RecQ-type helicases are indicated<sup>9</sup>.

**Supplementary Table 1 Definitions of homologous block and box sequences in *SH-D* regions.**

Length and position of each sequence corresponding to PomBase are shown.

| Block or box      | Length (bp) | Position in PomBase |                       |
|-------------------|-------------|---------------------|-----------------------|
|                   |             | Ch                  | bp                    |
| I                 | 4,629       | 2                   | 4,532,900 – 4,537,528 |
| II ( <i>tlh</i> ) | 6,015       | 2                   | 4,526,885 – 4,532,899 |
| III               | 6,471       | 2                   | 4,520,414 – 4,526,884 |
| $\Psi$ SH1L-L     | 560         | 1                   | 12,136 – 12,695       |
| IV                | 3,137       | 1                   | 12,696 – 15,832       |
| $\Psi$ SH2R       | 550         | 2                   | 4,519,864 – 4,520,413 |
| V                 | 5,027       | 2                   | 4,514,837 – 4,519,863 |
| $\Omega$ SH1L-L   | 1,279       | 1                   | 21,352 – 22,630       |
| $\Omega$ SH2R-L   | 1,258       | 2                   | 4,513,579 – 4,514,836 |
| VI                | 5,868       | 2                   | 4,507,711 – 4,513,578 |
| $\Omega$ SH2R-R   | 1,227       | 2                   | 4,506,484 – 4,507,710 |
| VII               | 6,173       | 2                   | 4,500,311 – 4,506,483 |
| VIII              | 1,872       | 2                   | 4,498,439 – 4,500,310 |
| IX                | 1,347       | 2                   | 4,497,092 – 4,498,438 |
| X                 | 4,962       | 2                   | 4,492,130 – 4,497,091 |
| XI                | 8,659       | 1                   | 40,622 – 49,280       |
| $\epsilon$        | 11,504      | 1                   | 49,281 – 60,784       |
| $\zeta$           | 12,489      | 1                   | 5,545,205 – 5,557,693 |
| $\eta$            | 507         | 2                   | 29,493 – 29,999       |

**Supplementary Table 2 Identities between genome sequences of *S. pombe* strains and those in PomBase.**

|                      |              |                       |                       | vs. PomBase    |                   |                |                   |              |        |
|----------------------|--------------|-----------------------|-----------------------|----------------|-------------------|----------------|-------------------|--------------|--------|
| Positions in PomBase |              |                       |                       | 972SD4[2R+] #1 |                   | 972SD4[2R+] #2 |                   | JB22 (972)   |        |
| Locus                | Ch           | bp                    | Match /Total (bp)     | Identity (%)   | Match /Total (bp) | Identity (%)   | Match /Total (bp) | Identity (%) |        |
| Subtelomere          | <i>tlh2</i>  | 4,525,719 – 4,533,144 | 7,410/7,452           | 99.44          | 7,408/7,452       | 99.41          |                   |              |        |
|                      |              | 4,521,826 – 4,524,375 | 2,549/2,550           | 99.96          | 2,549/2,550       | 99.96          |                   |              |        |
|                      |              | 4,510,792 – 4,512,641 | 1,850/1,850           | 100.00         | 1,850/1,850       | 100.00         |                   |              |        |
|                      |              | 4,504,812 – 4,506,754 | 1,943/1,943           | 100.00         | 1,943/1,943       | 100.00         |                   |              |        |
|                      | <i>SH-D</i>  | 4,489,185 – 4,490,293 | 1,109/1,109           | 100.00         | 1,109/1,109       | 100.00         | 1,109/1,109       | 100.00       |        |
|                      |              | 4,484,916 – 4,486,915 | 2,000/2,000           | 100.00         | 2,000/2,000       | 100.00         | 2,000/2,000       | 100.00       |        |
|                      |              | 4,469,756 – 4,472,805 | 3,050/3,050           | 100.00         | 3,050/3,050       | 100.00         | 3,050/3,050       | 100.00       |        |
|                      |              | 4,454,962 – 4,458,161 | 3,200/3,200           | 100.00         | 3,200/3,200       | 100.00         | 3,200/3,200       | 100.00       |        |
|                      |              | 4,439,149 – 4,443,731 | 4,583/4,583           | 100.00         | 4,583/4,583       | 100.00         | 4,583/4,583       | 100.00       |        |
| Boundary             | SA           | 4,431,856 – 4,435,505 | 3,650/3,650           | 100.00         | 3,650/3,650       | 100.00         | 3,650/3,650       | 100.00       |        |
|                      |              | 3,098,366 – 3,100,576 | 2,211/2,211           | 100.00         | 2,211/2,211       | 100.00         | 2,211/2,211       | 100.00       |        |
| Shelterin complex    | <i>rap1</i>  | 2                     | 3,091,237 – 3,093,228 | 1,992/1,992    | 100.00            | 1,992/1,992    | 100.00            | 1,992/1,992  | 100.00 |
|                      | <i>taz1</i>  | 1                     | 4,129,529 – 4,131,314 | 1,786/1,786    | 100.00            | 1,786/1,786    | 100.00            | 1,786/1,786  | 100.00 |
|                      | <i>pot1</i>  | 1                     | 4,974,116 – 4,975,480 | 1,365/1,365    | 100.00            | 1,365/1,365    | 100.00            | 1,365/1,365  | 100.00 |
| Non-essential genes  | <i>gcn5</i>  | 1                     | 456,575 – 458,047     | 1,473/1,473    | 100.00            | 1,473/1,473    | 100.00            | 1,473/1,473  | 100.00 |
|                      | <i>clr4</i>  | 2                     | 206,864 – 207,913     | 1,050/1,050    | 100.00            | 1,050/1,050    | 100.00            | 1,050/1,050  | 100.00 |
|                      | <i>sty1</i>  | 1                     | 3,483,454 – 3,484,668 | 1,215/1,215    | 100.00            | 1,215/1,215    | 100.00            | 1,215/1,215  | 100.00 |
|                      | <i>zfs1</i>  | 2                     | 421,123 – 422,571     | 1,449/1,449    | 100.00            | 1,449/1,449    | 100.00            | 1,449/1,449  | 100.00 |
| Essential genes      | <i>cdc13</i> | 2                     | 1,476,149 – 1,477,276 | 1,128/1,128    | 100.00            | 1,128/1,128    | 100.00            | 1,128/1,128  | 100.00 |
|                      | <i>act1</i>  | 2                     |                       |                |                   |                |                   |              |        |

|                      |              |                       |                       | vs. PomBase  |                   |              |                   |              |        |
|----------------------|--------------|-----------------------|-----------------------|--------------|-------------------|--------------|-------------------|--------------|--------|
| Positions in PomBase |              |                       |                       | JB760        |                   | JB1174       |                   | JB934        |        |
| Locus                | Ch           | bp                    | Match /Total (bp)     | Identity (%) | Match /Total (bp) | Identity (%) | Match /Total (bp) | Identity (%) |        |
| Subtelomere          | <i>tlh2</i>  | 4,525,719 – 4,533,144 |                       |              |                   |              |                   |              |        |
|                      |              | 4,521,826 – 4,524,375 |                       |              |                   |              |                   |              |        |
|                      |              | 4,510,792 – 4,512,641 |                       |              |                   |              |                   |              |        |
|                      |              | 4,504,812 – 4,506,754 |                       |              |                   |              |                   |              |        |
|                      | <i>SH-D</i>  | 4,489,185 – 4,490,293 | 1,109/1,109           | 100.00       | 1,109/1,109       | 100.00       |                   |              |        |
|                      |              | 4,484,916 – 4,486,915 | 2,000/2,000           | 100.00       | 2,000/2,000       | 100.00       |                   |              |        |
|                      |              | 4,469,756 – 4,472,805 | 3,050/3,050           | 100.00       | 3,049/3,050       | 99.97        | 3,024/3,058       | 98.89        |        |
|                      |              | 4,454,962 – 4,458,161 | 3,200/3,200           | 100.00       | 3,200/3,200       | 100.00       | 3,154/3,209       | 98.29        |        |
|                      |              | 4,439,149 – 4,443,731 | 4,583/4,583           | 100.00       | 4,582/4,583       | 99.98        | 4,533/4,599       | 98.56        |        |
| Boundary             | SA           | 4,431,856 – 4,435,505 | 3,650/3,650           | 100.00       | 3,650/3,650       | 100.00       | 3,630/3,655       | 99.32        |        |
|                      |              | 3,098,366 – 3,100,576 | 2,209/2,212           | 99.86        | 2,209/2,212       | 99.86        | 2,191/2,211       | 99.10        |        |
| Shelterin complex    | <i>rap1</i>  | 2                     | 3,091,237 – 3,093,228 | 1,991/1,992  | 99.95             | 1,992/1,992  | 100.00            | 1,991/1,992  | 99.95  |
|                      | <i>taz1</i>  | 1                     | 4,129,529 – 4,131,314 | 1,785/1,786  | 99.94             | 1,786/1,786  | 100.00            | 1,786/1,786  | 100.00 |
|                      | <i>pot1</i>  | 1                     | 4,974,116 – 4,975,480 | 1,365/1,365  | 100.00            | 1,365/1,365  | 100.00            | 1,365/1,365  | 100.00 |
| Non-essential genes  | <i>gcn5</i>  | 1                     | 456,575 – 458,047     | 1,473/1,473  | 100.00            | 1,473/1,473  | 100.00            | 1,472/1,473  | 99.93  |
|                      | <i>clr4</i>  | 2                     | 206,864 – 207,913     | 1,050/1,050  | 100.00            | 1,050/1,050  | 100.00            | 1,048/1,050  | 99.81  |
|                      | <i>sty1</i>  | 1                     | 3,483,454 – 3,484,668 | 1,215/1,215  | 100.00            | 1,215/1,215  | 100.00            | 1,215/1,215  | 100.00 |
|                      | <i>zfs1</i>  | 2                     | 421,123 – 422,571     | 1,449/1,449  | 100.00            | 1,449/1,449  | 100.00            | 1,448/1,449  | 99.93  |
| Essential genes      | <i>cdc13</i> | 2                     | 1,476,149 – 1,477,276 | 1,127/1,128  | 99.91             | 1,128/1,128  | 100.00            | 1,128/1,128  | 100.00 |
|                      | <i>act1</i>  | 2                     |                       |              |                   |              |                   |              |        |

|                      |              |                       |                       | vs. PomBase  |                   |              |                   |              |       |
|----------------------|--------------|-----------------------|-----------------------|--------------|-------------------|--------------|-------------------|--------------|-------|
| Positions in PomBase |              |                       |                       | JB858        |                   | JB873        |                   | JB1197       |       |
| Locus                | Ch           | bp                    | Match /Total (bp)     | Identity (%) | Match /Total (bp) | Identity (%) | Match /Total (bp) | Identity (%) |       |
| Subtelomere          | <i>tlh2</i>  | 4,525,719 – 4,533,144 |                       |              |                   |              |                   |              |       |
|                      |              | 4,521,826 – 4,524,375 |                       |              |                   |              |                   |              |       |
|                      |              | 4,510,792 – 4,512,641 |                       |              |                   |              |                   |              |       |
|                      |              | 4,504,812 – 4,506,754 |                       |              |                   |              |                   |              |       |
|                      | <i>SH-D</i>  | 4,489,185 – 4,490,293 | 1,098/1,109           | 99.01        | 1,098/1,109       | 99.01        | 1,098/1,109       | 99.01        |       |
|                      |              | 4,484,916 – 4,486,915 | 1,984/2,000           | 99.20        | 1,985/2,000       | 99.25        | 1,984/2,000       | 99.20        |       |
|                      |              | 4,469,756 – 4,472,805 | 3,021/3,058           | 98.79        | 3,023/3,058       | 98.86        | 3,022/3,057       | 98.86        |       |
|                      |              | 4,454,962 – 4,458,161 | 3,153/3,217           | 98.01        | 3,151/3,221       | 97.83        | 3,153/3,219       | 97.95        |       |
|                      |              | 4,439,149 – 4,443,731 | 4,528/4,603           | 98.37        | 4,529/4,602       | 98.41        | 4,522/4,607       | 98.15        |       |
| Boundary             | SA           | 4,431,856 – 4,435,505 | 3,631/3,655           | 99.34        | 3,631/3,655       | 99.34        | 3,630/3,655       | 99.32        |       |
|                      |              | 3,098,366 – 3,100,576 | 2,192/2,211           | 99.14        | 2,192/2,211       | 99.14        | 2,183/2,211       | 98.73        |       |
| Shelterin complex    | <i>rap1</i>  | 2                     | 3,091,237 – 3,093,228 | 1,982/1,992  | 99.50             | 1,982/1,992  | 99.50             | 1,983/1,992  | 99.55 |
|                      | <i>taz1</i>  | 1                     | 4,129,529 – 4,131,314 | 1,786/1,786  | 100.00            | 1,786/1,786  | 100.00            | 1,785/1,786  | 99.94 |
|                      | <i>pot1</i>  | 1                     | 4,974,116 – 4,975,480 | 1,364/1,365  | 99.93             | 1,365/1,365  | 100.00            | 1,362/1,365  | 99.78 |
| Non-essential genes  | <i>gcn5</i>  | 1                     | 456,575 – 458,047     | 1,472/1,473  | 99.93             | 1,472/1,473  | 99.93             | 1,464/1,473  | 99.39 |
|                      | <i>clr4</i>  | 2                     | 206,864 – 207,913     | 1,049/1,050  | 99.90             | 1,048/1,050  | 99.81             | 1,049/1,050  | 99.90 |
|                      | <i>sty1</i>  | 1                     | 3,483,454 – 3,484,668 | 1,215/1,215  | 100.00            | 1,215/1,215  | 100.00            | 1,213/1,215  | 99.84 |
|                      | <i>zfs1</i>  | 2                     | 421,123 – 422,571     | 1,448/1,449  | 99.93             | 1,448/1,449  | 99.93             | 1,448/1,449  | 99.93 |
| Essential genes      | <i>cdc13</i> | 2                     | 1,476,149 – 1,477,276 | 1,128/1,128  | 100.00            | 1,128/1,128  | 100.00            | 1,127/1,128  | 99.91 |
|                      | <i>act1</i>  | 2                     |                       |              |                   |              |                   |              |       |

### Supplementary Table 3 Fission yeast strains used in this study.

---

|                         |                                                                                                                                                                                 |
|-------------------------|---------------------------------------------------------------------------------------------------------------------------------------------------------------------------------|
| 972/JK107               | <i>h<sup>-</sup></i>                                                                                                                                                            |
| JP1225                  | <i>h<sup>-</sup> ade6-M216 leu1-32 ura4-D18 his7-366</i> (CHP429 from C. Hoffman)                                                                                               |
| ST3524 (SD5)            | <i>h<sup>+</sup> ade6-M210 leu1-32 ura4-D18 his7-366 SH1L::ura4<sup>+</sup> SH1R::his7<sup>+</sup><br/>SH2L::his7<sup>+</sup> SH2R::his7<sup>+</sup> SH3L::ura4<sup>+</sup></i> |
| ST3479 (SD5)            | <i>h<sup>-</sup> ade6-M216 leu1-32 ura4-D18 his7-366 SH1L::ura4<sup>+</sup> SH1R::his7<sup>+</sup><br/>SH2L::his7<sup>+</sup> SH2R::his7<sup>+</sup> SH3L::ura4<sup>+</sup></i> |
| ST5057 (972SD4[1L+] #1) | <i>h<sup>+</sup> ade6-M216 leu1-32 ura4-D18 his7-366 SH1R::his7<sup>+</sup> SH2L::his7<sup>+</sup><br/>SH2R::his7<sup>+</sup> SH3L::ura4<sup>+</sup></i>                        |
| ST5058 (972SD4[1L+] #2) | <i>h<sup>-</sup> ade6-M216 leu1-32 ura4-D18 his7-366 SH1R::his7<sup>+</sup> SH2L::his7<sup>+</sup><br/>SH2R::his7<sup>+</sup> SH3L::ura4<sup>+</sup></i>                        |
| ST5345 (972SD4[1L+] #3) | <i>h<sup>-</sup> ade6-M210 leu1-32 ura4-D18 SH1R::his7<sup>+</sup> SH2L::his7<sup>+</sup><br/>SH2R::his7<sup>+</sup> SH3L::ura4<sup>+</sup></i>                                 |
| ST5059 (972SD4[1R+] #1) | <i>h<sup>-</sup> ura4-D18 SH1L::ura4<sup>+</sup> SH2L::his7<sup>+</sup> SH2R::his7<sup>+</sup> SH3L::ura4<sup>+</sup></i>                                                       |
| ST5346 (972SD4[1R+] #2) | <i>h<sup>+</sup> ade6-M216 leu1-32 ura4-D18 his7-366 SH1L::ura4<sup>+</sup> SH2L::his7<sup>+</sup><br/>SH2R::his7<sup>+</sup> SH3L::ura4<sup>+</sup></i>                        |
| ST5347 (972SD4[1R+] #3) | <i>h<sup>+</sup> ade6-M210 leu1-32 his7-366 SH1L::ura4<sup>+</sup> SH2L::his7<sup>+</sup><br/>SH2R::his7<sup>+</sup> SH3L::ura4<sup>+</sup></i>                                 |
| ST4932 (972SD4[2L+] #1) | <i>h<sup>-</sup> ura4-D18 SH1L::ura4<sup>+</sup> SH1R::his7<sup>+</sup> SH2R::his7<sup>+</sup> SH3L::ura4<sup>+</sup></i>                                                       |
| ST5060 (972SD4[2L+] #2) |                                                                                                                                                                                 |



*h<sup>-</sup> ade6-M210 ura4-D18 SH1L::ura4<sup>+</sup> SH1R::his7<sup>+</sup>*  
*SH2R::his7<sup>+</sup> SH3L::ura4<sup>+</sup>*

ST5348 (972SD4[2L+] #3)

*h<sup>+</sup> ade6-M210 leu1-32 ura4-D18 his7-366 SH1L::ura4<sup>+</sup> SH1R::his7<sup>+</sup>*  
*SH2R::his7<sup>+</sup> SH3L::ura4<sup>+</sup>*

ST5349 (972SD4[2R+] #1)

*h<sup>-</sup> ade6-M216 leu1-32 ura4-D18 his7-366 SH1L::ura4<sup>+</sup> SH1R::his7<sup>+</sup>*  
*SH2L::his7<sup>+</sup> SH3L::ura4<sup>+</sup>*

ST5350 (972SD4[2R+] #2)

*h<sup>+</sup> ade6-M210 leu1-32 ura4-D18 his7-366 SH1L::ura4<sup>+</sup> SH1R::his7<sup>+</sup>*  
*SH2L::his7<sup>+</sup> SH3L::ura4<sup>+</sup>*

ST5351 (972SD4[2R+] #3)

*h<sup>-</sup> ade6-M210 SH1L::ura4<sup>+</sup> SH1R::his7<sup>+</sup> SH2L::his7<sup>+</sup> SH3L::ura4<sup>+</sup>*

**For Fig. 8c**

JP3827 (972 *clr4*Δ) *h<sup>-</sup> clr4::kanMX6*

ST3499 (SD5 *clr4*Δ) *h<sup>-</sup> ade6-M216 leu1-32 ura4-D18 his7-366 SH1L::ura4<sup>+</sup> SH1R::his7<sup>+</sup>*  
*SH2L::his7<sup>+</sup> SH2R::his7<sup>+</sup> SH3L::ura4<sup>+</sup> clr4::hphMX6*

JP5831 (972SD4[1L+] *clr4*Δ #1)

*h<sup>+</sup> ade6-M216 leu1-32 ura4-D18 his7-366 SH1R::his7<sup>+</sup> SH2L::his7<sup>+</sup>*  
*SH2R::his7<sup>+</sup> SH3L::ura4<sup>+</sup> clr4::hphMX6*

JP5833 (972SD4[1R+] *clr4*Δ #1)

*h<sup>-</sup> ura4-D18 SH1L::ura4<sup>+</sup> SH2L::his7<sup>+</sup> SH2R::his7<sup>+</sup> SH3L::ura4<sup>+</sup>*  
*clr4::hphMX6*

JP5835 (972SD4[2L+] *clr4*Δ #1)

*h<sup>-</sup> ura4-D18 SH1L::ura4<sup>+</sup> SH1R::his7<sup>+</sup> SH2R::his7<sup>+</sup> SH3L::ura4<sup>+</sup>*  
*clr4::hphMX6*

JP5837 (972SD4[2R+] *clr4*Δ #1)

*h<sup>-</sup> ade6-M216 leu1-32 ura4-D18 his7-366 SH1L::ura4<sup>+</sup> SH1R::his7<sup>+</sup>*  
*SH2L::his7<sup>+</sup> SH3L::ura4<sup>+</sup> clr4::hphMX6*

## Supplementary Table 4 PCR primers used in this study.

### For amplification of the *SPBCPT2R1.03* ORF

|       |                                   |
|-------|-----------------------------------|
| st498 | 5'- ATGAGTATTGAATTCGATGACAG-3'    |
| st499 | 5'- ACCATTCAAATTGTATTTCAAGTATG-3' |

### For amplification of *SH-D* regions

#### *subtel-5.2-7.9 kb*

|       |                                    |
|-------|------------------------------------|
| jk618 | 5'-GCCTACCGCTTGCAGTTGTT-3'         |
| jk621 | 5'-ACAGTAAACTATGATCGCTTTTGAAGAC-3' |

#### *subtel-7.9-9.3 kb*

|       |                                      |
|-------|--------------------------------------|
| jk620 | 5'-TTCTTAATCATTATCAAGTATTCATTGCAA-3' |
| jk452 | 5'-CAACTTGCGAGAATGTAAACTACGTATTC-3'  |

#### *subtel-9.1-10.8 kb*

|       |                                 |
|-------|---------------------------------|
| jk451 | 5'-TGCCTTTCTAGCCCATGACCTA-3'    |
| jk385 | 5'-CAGCATTAAACCAACAGTGGTCTTC-3' |

#### *subtel-10.7-13.2 kb*

|       |                            |
|-------|----------------------------|
| jk384 | 5'-GCTCTCGACAAAGCCGTTCT-3' |
| jk387 | 5'-CATCAGCAACGTCGCCAACT-3' |

#### *subtel-13.0-15.1 kb*

|       |                                 |
|-------|---------------------------------|
| jk386 | 5'-TTCCAAGTATGCCAGCTTATCATC-3'  |
| jk454 | 5'-TAAAGATTCATGGAACCATCATTTG-3' |

#### *subtel-14.9-17.2 kb*

|       |                                |
|-------|--------------------------------|
| jk453 | 5'-AAAGAATTCGAATCACCCATACCA-3' |
| jk683 | 5'-GGGTCAAAACCTGCGCATAA-3'     |

#### *subtel-17.1-19.0 kb*

|       |                              |
|-------|------------------------------|
| jk682 | 5'-AATTTTCAGTTGCCAAGGGACA-3' |
| jk456 | 5'-GACCGCTACGCAACCATAAAG-3'  |

#### *subtel-18.9-21.3 kb*

|       |                                  |
|-------|----------------------------------|
| jk455 | 5'-AACGAGTTGTGCAATGTTAGTAAGGT-3' |
| jk561 | 5'-TGACCACCCTCATAAGCCTGT-3'      |

#### *subtel-21.3-23.3 kb*

jk560            5'-TGTTACGTGGCAAGGCAGACT-3'  
 jk559            5'-AACTCGCTTGATGAATGGGTG-3'  
**subtel-23.3-26.2 kb**  
 jk558            5'-GACAACCCGACCCATGGAT-3'  
 jk555            5'-GACCCCAATGGCCGAGAT-3'  
**subtel-26.2-27.7 kb**  
 jk554            5'-GCTGCATGTTTATATCCTTGGCT-3'  
 jk689            5'-GAGCCCAATGACCAAATAACAAA-3'  
**subtel-27.7-29.0 kb**  
 jk688            5'-CAGCCCTGGGTGCAACTATAA-3'  
 jk389            5'-TGTTACTCATACTTCAAATACAATTTGAATG-3'  
**subtel-34.9-36.9 kb**  
 tk74             5'-ACATTCAGAAACAACAGTTGG-3'  
 jk691            5'-GCTCCATCCATTGTCATTGGT-3'

**For detection of lengths of SH-D regions**

**subtel2R-4.2-11.1 kb (i)**

tk121            5'-ATTCTTTTCACTTTCTTTTCCTCG-3'  
 tk66             5'-CCATGATGTCGTTACGGC-3'

**subtel2R-9.3-15.7 kb (ii)**

jk451            5'-TGCCTTTCTAGCCCATGACCTA-3'  
 tk79             5'-CATTCATTTTCTACACGCTCTATTATTTC-3'

**subtel2R-14.8-20.7 kb (iii)**

jk1611           5'-CATCCGGCGATATCTCTAGCAG-3'  
 tk44             5'-CAAAGTTGTATTCATGCTTGTTAC-3'

**subtel2R-20.6-22.1 kb (iv)**

tk114            5'-TCATTACCAAAGTTTAAAACGC-3'  
 tk113            5'-AGTCTGAATGTGCCAACTC-3'

**subtel2R-22.1-26.7 kb (v)**

tk122            5'-GAGTTGGCACATTCAGACT-3'  
 tk123            5'-GGTATCGGTCACCGATATAGC-3'

**subtel2R-26.7-35.4 kb (vi)**

tk102 5'-GCTATATCGGTGACCGATAACC-3'

tk130 5'-GGGAGTCCAAATTGGTTCAA-3'

**subtel2R-35.4-40.9 kb (vii)**

tk76 5'-TTGAACCAATTTGGACTCCC-3'

tk144 5'-GGTGTTCGCGGATCTTCA-3'

**subtel2R-40.7-44.1 kb (viii)**

jk692 5'-CGCGCACTTTTCGGACATA-3'

tk115 5'-GTATGATTTTCAAAGTGTCCC-3'

**subtel2R-44.1-47.5 kb (ix)**

tk124 5'-GGGACAGTTTGAAAAATCATAAC-3'

tk125 5'-CAACGACTAAGTCTATACATCGG-3'

**rap1 (control)**

jk900 5'-AATTGTAAAGCCTTACTCGGCCCAAAGGATTATACACAA-  
AG-3'

jk1219 5'-ATGAAGAATCTGGAGTTGACGTAG-3'

**For Ch2R sequencing**

**subtel2R-17.1-19.8 kb**

jk682 5'-AATTTTCAGTTGCCAAGGGACA-3'

tk52 5'-GGAATTGATTATCAACTCATTGGAC-3'

**subtel2R-29.0-30.9 kb**

jk388 5'-GGCACAATTTTCATTTTCGTTTAGTTTAC-3'

jk685 5'-TGCCGGTATTTAAGATGCACAT-3'

**subtel2R-34.6-36.9 kb**

jk688 5'-CAGCCCTGGGTGCAACTATAA-3'

jk691 5'-GCTCCATCCATTGTCATTGGT-3'

**subtel2R-50.8-52.3 kb**

jk700 5'-TCCGCAAATTTTGTAGCCAT-3'

jk703 5'-ACGGGCGGTATGGATCAAT-3'

**subtel2R-54.8-57.0 kb**

jk704 5'-TTCCAATCCCAGAGTCGTGTC-3'

jk707 5'-AATAGACTTGGTCTGGATGAAGCAG-3'

**subtel2R-69.0-72.2 kb**

jk710 5'-GCTTTTATGCAATGTCTTGACGA-3'  
tk131 5'-CCTTGATACATGGAACCTCG-3'

***subtel2R-83.6-86.4 kb***

tk133 5'-AGTCCTTGTCGGCAGAATCT-3'  
tk132 5'-AAGCTATCTGGGAAGCCG-3'

***subtel2R-98.0-102.7 kb***

km38 5'-TTCAGGATTAAGGTAACGCGGT-3'  
st104 5'-TTTATGCATCCAACCGTTTCA-3'

***2R-106.2-110.0 kb***

st214 5'-GCTTTACTCCTTTCAGGCGTATG-3'  
km41 5'-CGATCGTCCACTACTTCACGTTT-3'

**For sequencing of control gene loci**

***rap1***

jk926 5'-CACTCCACTTACTCATCCAGC-3'  
jk1219 5'-ATGAAGAATCTGGAGTTGACGTAG-3'

***taz1***

jk1918 5'-TGGTATTCTTACATTGTTCTAAGGGATTATG-3'  
jk1222 5'-TAACAAAACCTATCCGAGTCTTGTC-3'

***pot1***

jk1916 5'-CTTTTACCAATTCCATTTAGGTTTCTGAG-3'  
jk1917 5'-CTTTATAAAATTCTCCAATATAGAGCTTTCC-3'

***gcn5***

jk1914 5'-TGCTCGTTTCATCTTGTATCGTTCTT-3'  
jk1915 5'-TTTGGGAAGGCACAAAAGATATTCGTG-3'

***clr4***

jk1908 5'-AAATTCG TTCAGGCATCATTTGG-3'  
jk1909 5'-TGCTTAGAAAATGAATGACCTTTTTTCAG-3'

***sty1***

jk1912 5'-AGTTACTTTTCGATATAGACGAAGGAC-3'  
jk1913 5'-CTAAAATTCCATGGAACCGAGATGAT-3'

***zfs1***

jk1906 5'-TTCTTTGTTTCGTTTATAACTAATC-3'  
 jk1907 5'-AAGGAGGATAGGAAAGTAAGCGTCATA-3'  
***cdc13***  
 jk1904 5'-CTCTTTTTTATCATTCTGTTACCTGAACC-3'  
 jk1905 5'-AACTAATACACATATAAAGAGCGCTTG-3'  
***act1***  
 jk1910 5'-ACCTCAGCCAGCCGTGTTATAACTTA-3'  
 jk1911 5'-AAAGTTCCTCATGAGATGTTAAGAGC-3'

**For detection of RNA and DNA from upstream of the *tlh* ORFs**

jk567 (a) 5'-TTGCTGCTGCACAAAGCTTTTTG-3'  
 tk79 (b) 5'-CATTCATTTTCTACACGCTCTATTATTC-3'  
 jk1612 (c) 5'-TGGTCGTCGCTTCAGAAATTG-3'  
 tk41 5'-ATGTTTTGTGCATCTTCTTTCTCC-3'

***rap1* (control)**

jk1300 5'-TATAAAGAATTCTCTAAATGAAGTTTCACGCAAGGT-3'  
 jk1206 5'-TATAAACCCGGGGTATCCTCAACATTCTTTGAATC-3'

**For detection of RNA from *dh*-homologous regions in the *tlh* genes**

***dh*-homologous region**

jk458 5'-TCGATAGAGATACGTTTCATCTCATAGTGT-3'  
 jk457 5'-CACTCATTTCTTTGCTGATCACTTACT-3'

***his1* (control)**

jk1335 5'-CGAAGACGTGCTTCAGCGA-3'  
 jk1336 5'-TGTCCACCTCGGAATCACTG-3'

### Supplementary references

- 1 Ohno, Y., Ogiyama, Y., Kubota, Y., Kubo, T. & Ishii, K. Acentric chromosome ends are prone to fusion with functional chromosome ends through a homology-directed rearrangement. *Nucleic Acids Res.* **44**, 232-244 (2016).
- 2 Tashiro, S., Nishihara, Y., Kugou, K., Ohta, K. & Kanoh, J. Subtelomeres constitute a safeguard for gene expression and chromosome homeostasis. *Nucleic Acids Res.* **45**, 10333-10349 (2017).
- 3 Chen, Y. *et al.* A conserved motif within RAP1 has diversified roles in telomere protection and regulation in different organisms. *Nat. Struct. Mol. Biol.* **18**, 213-221 (2011).
- 4 Deng, W. *et al.* Fission yeast telomere-binding protein Taz1 is a functional but not a structural counterpart of human TRF1 and TRF2. *Cell Res.* **25**, 881-884 (2015).
- 5 Kanoh, J. & Ishikawa, F. spRap1 and spRif1, recruited to telomeres by Taz1, are essential for telomere function in fission yeast. *Curr. Biol.* **11**, 1624-1630 (2001).
- 6 Fujita, I., Tanaka, M. & Kanoh, J. Identification of the functional domains of the telomere protein Rap1 in *Schizosaccharomyces pombe*. *PLoS One* **7**, e49151 (2012).
- 7 Xue, J. *et al.* Structure of the fission yeast *S. pombe* telomeric Tpz1-Poz1-Rap1 complex. *Cell Res.* **27**, 1503-1520 (2017).
- 8 Hu, C. *et al.* The inner nuclear membrane protein Bqt4 in fission yeast contains a DNA-binding domain essential for telomere association with the nuclear envelope. *Structure* **27**, 335-343 (2019).
- 9 Mandell, J. G., Goodrich, K. J., Bahler, J. & Cech, T. R. Expression of a RecQ helicase homolog affects progression through crisis in fission yeast lacking telomerase. *J. Biol. Chem.* **280**, 5249-5257 (2005).
